# Supplementary material for: Effect of mid-term drought on Quercus pubescens BVOCs' emission seasonality and their dependency on light and/or temperature
Source: Copernicus journal article supplement (doi:10.5194/acp-17-7555-2017), 2017-06-22
Supplement: Supplementary file 1 [file acp-17-7555-2017-supplement.zip]

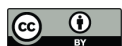

## *Supplement of*

# **Effect of mid-term drought on *Quercus pubescens* BVOCs' emission seasonality and their dependency on light and/or temperature**

**Amélie Saunier et al.**

*Correspondence to:* Amélie Saunier ([amelie.saunier@imbe.fr](mailto:amelie.saunier@imbe.fr))

- [acp-17-7555-2017-supplement-title-page.pdf](#)
- [Supplement.pdf](#)
- [data set Saunier et al. 2017.xlsx](#)

The copyright of individual parts of the supplement might differ from the CC BY 3.0 License.
