# Supplementary material for: Effect of mid-term drought on Quercus pubescens BVOCs' emission seasonality and their dependency on light and/or temperature
Source: Copernicus journal article supplement (doi:10.5194/acp-17-7555-2017), 2017-06-22
Supplement: Supplementary file 2 [file acp-17-7555-2017-supplement.zip]

Archive with 3 entries (3 files):
- acp-17-7555-2017-supplement-title-page.pdf
- data set Saunier et al. 2017.xlsx
- Supplement.pdf
