# Supplementary material for: Effect of mid-term drought on Quercus pubescens BVOCs' emission seasonality and their dependency on light and/or temperature
Source: Copernicus journal article supplement (doi:10.5194/acp-17-7555-2017), 2017-06-22
Supplement: Supplementary file 2 [file acp-17-7555-2017-supplement.zip › data set Saunier et al. 2017.xlsx]

## Sheet: isoprene spring
date	treatement	trees code	PAR	TEMP (°C)	TEMP (K)	Emissions Rate isoprene (µgC.g(MS)-1.h-1)
12/05/2014 20h	natural drought	C2	72.8861	22.0939	295.244	0.807712
12/05/2014 21h	natural drought	C2	10.7855	21.2159	294.366	0.136313
12/05/2014 22h	natural drought	C2	0.00285425	20.6017	293.752	0.064468
12/05/2014 23h	natural drought	C2	0.00137445	20.4121	293.562	0.0554061
13/05/2014 00h	natural drought	C2	0.00165702	19.7439	292.894	0.0482152
13/05/2014 01h	natural drought	C2	0.00201519	19.1374	292.287	0.0366248
13/05/2014 02h	natural drought	C2	0.00104849	18.991	292.141	0.0260689
13/05/2014 03h	natural drought	C2	0.00130132	18.5595	291.71	0.0230725
13/05/2014 04h	natural drought	C2	0.000975496	18.286	291.436	0.0181398
13/05/2014 05h	natural drought	C2	0.00275369	18.1874	291.337	0.0190231
13/05/2014 06h	natural drought	C2	0.15613	18.1829	291.333	0.0185344
13/05/2014 07h	natural drought	C2	47.1451	18.4127	291.563	0.0729608
13/05/2014 08h	natural drought	C2	111.549	19.6496	292.8	0.610104
13/05/2014 09h	natural drought	C2	146.192	20.8553	294.005	1.37123
13/05/2014 10h	natural drought	C2	233.505	22.0209	295.171	3.36413
13/05/2014 11h	natural drought	C2	661.713	24.0583	297.208	3.22852
13/05/2014 12h	natural drought	C2	1086.46	26.1197	299.27	8.17987
13/05/2014 13h	natural drought	C2	1193.67	26.1605	299.311	17.6641
13/05/2014 14h	natural drought	C2	1659.61	24.8671	298.017	16.2746
13/05/2014 15h	natural drought	C2	1913.93	24.7149	297.865	20.2734
13/05/2014 16h	natural drought	C2	2003.56	25.7397	298.89	15.5653
13/05/2014 17h	natural drought	C2	1951.54	24.2279	297.378	11.5582
13/05/2014 18h	natural drought	C2	286.744	23.5522	296.702	11.4739
11/05/2014 17h	natural drought	C3	367.993	25.6111	298.761	4.70943
11/05/2014 18h	natural drought	C3	212.502	25.5295	298.679	3.4458
11/05/2014 19h	natural drought	C3	154.645	24.8677	298.018	2.00569
11/05/2014 20h	natural drought	C3	39.939	23.7669	296.917	0.452049
11/05/2014 21h	natural drought	C3	0.138401	22.803	295.953	0.097316
11/05/2014 22h	natural drought	C3	0.00124183	22.4022	295.552	0.0769488
11/05/2014 23h	natural drought	C3	0.00120093	21.959	295.109	0.0587839
12/05/2014 00h	natural drought	C3	0.000506895	21.5081	294.658	0.0568054
12/05/2014 01h	natural drought	C3	0.000576298	21.2261	294.376	0.060741
12/05/2014 02h	natural drought	C3	0.000581256	21.1539	294.304	0.0563298
12/05/2014 03h	natural drought	C3	0.0005354	20.995	294.145	0.0513548
12/05/2014 04h	natural drought	C3	0.000546553	20.8498	294	0.0568823
12/05/2014 05h	natural drought	C3	0.00107451	20.8068	293.957	0.0371206
12/05/2014 06h	natural drought	C3	6.05503	20.495	293.645	0.0479465
12/05/2014 07h	natural drought	C3	83.0046	20.6259	293.776	0.234501
12/05/2014 08h	natural drought	C3	540.153	24.6913	297.841	6.08997
12/05/2014 09h	natural drought	C3	1066.53	27.1683	300.318	14.9035
12/05/2014 10h	natural drought	C3	623.052	26.0099	299.16	10.5406
12/05/2014 11h	natural drought	C3	1039.4	25.8337	298.984	11.0409
12/05/2014 12h	natural drought	C3	1271.92	26.7602	299.91	10.7903
12/05/2014 13h	natural drought	C3	1528.05	27.2701	300.42	18.2612
12/05/2014 14h	natural drought	C3	1296.55	27.6894	300.839	12.4718
12/05/2014 15h	natural drought	C3	1197.77	26.6286	299.779	8.28492
12/05/2014 16h	natural drought	C3	719.045	24.9384	298.088	4.47665
13/05/2014 21h	natural drought	C4	0.146195	19.0509	292.201	0.0752563
13/05/2014 22h	natural drought	C4	0.00124679	18.8006	291.951	0.0645367
13/05/2014 23h	natural drought	C4	0.00261875	18.6969	291.847	0.0603157
14/05/2014 00h	natural drought	C4	0.00247994	18.3504	291.5	0.0404135
14/05/2014 01h	natural drought	C4	0.00171154	17.8185	290.969	0.0404159
14/05/2014 02h	natural drought	C4	0.00200156	18.1334	291.283	0.0383232
14/05/2014 03h	natural drought	C4	0.00161983	18.0721	291.222	0.0369025
14/05/2014 04h	natural drought	C4	0.0015839	18.1438	291.294	0.0395952
14/05/2014 05h	natural drought	C4	0.00767281	17.7725	290.922	0.0306524
14/05/2014 06h	natural drought	C4	25.0549	18.4876	291.638	0.0572276
14/05/2014 07h	natural drought	C4	415.187	20.3607	293.511	0.616205
14/05/2014 08h	natural drought	C4	837.637	22.4225	295.573	3.32431
14/05/2014 09h	natural drought	C4	819.089	23.8532	297.003	8.22728
14/05/2014 10h	natural drought	C4	1520.56	24.4471	297.597	4.51723
14/05/2014 11h	natural drought	C4	1741.6	25.2146	298.365	20.505
14/05/2014 12h	natural drought	C4	1864.46	26.1035	299.253	23.9252
14/05/2014 13h	natural drought	C4	1887.5	25.6408	298.791	29.5388
14/05/2014 14h	natural drought	C4	1814.39	25.9459	299.096	31.0531
14/05/2014 15h	natural drought	C4	1647.61	26.058	299.208	32.3596
14/05/2014 16h	natural drought	C4	1386.24	26.4832	299.633	27.7254
14/05/2014 17h	natural drought	C4	145.96	25.0099	298.16	14.8536
14/05/2014 18h	natural drought	C4	695.787	24.9911	298.141	14.1674
15/05/2014 21h	natural drought	C5	0.293926	20.0924	293.242	0.037941
15/05/2014 22h	natural drought	C5	0.00320373	19.4445	292.594	0.023666
15/05/2014 23h	natural drought	C5	0.00252469	19.0412	292.191	0.0207401
16/05/2014 00h	natural drought	C5	0.00212736	18.9035	292.054	0.0208495
16/05/2014 01h	natural drought	C5	0.0031777	18.5835	291.734	0.016199
16/05/2014 02h	natural drought	C5	0.00287157	18.3404	291.49	0.016046
16/05/2014 03h	natural drought	C5	0.00267205	18.189	291.339	0.0135789
16/05/2014 04h	natural drought	C5	0.00170411	17.9337	291.084	0.0122135
16/05/2014 05h	natural drought	C5	0.00515819	17.8614	291.011	0.0115024
16/05/2014 06h	natural drought	C5	17.5472	17.6235	290.773	0.0179482
16/05/2014 07h	natural drought	C5	163.628	18.3512	291.501	0.357564
16/05/2014 08h	natural drought	C5	735.62	21.0637	294.214	6.10083
16/05/2014 09h	natural drought	C5	1153.72	22.9052	296.055	8.56067
16/05/2014 10h	natural drought	C5	1531.35	23.8077	296.958	9.63174
16/05/2014 11h	natural drought	C5	1790.47	24.5369	297.687	15.1349
16/05/2014 12h	natural drought	C5	1950.85	25.2351	298.385	25.4004
16/05/2014 13h	natural drought	C5	2031.28	26.755	299.905	33.5988
16/05/2014 14h	natural drought	C5	1249.23	26.0836	299.234	20.0726
16/05/2014 15h	natural drought	C5	1822.53	26.6421	299.792	16.4599
16/05/2014 16h	natural drought	C5	600.377	24.8551	298.005	16.4711
16/05/2014 17h	natural drought	C5	334.3	23.5133	296.663	3.51443
16/05/2014 18h	natural drought	C5	198.047	22.8557	296.006	1.63953
16/05/2014 19h	natural drought	C5	186.545	21.696	294.846	1.25731
16/05/2014 20h	natural drought	C5	54.294	20.903	294.053	0.375778
13/05/2014 21h	amplified drought	S1	18.1734	19.6037	292.754	0.167818
13/05/2014 22h	amplified drought	S1	0.00597783	18.7341	291.884	0.0638549
13/05/2014 23h	amplified drought	S1	0.00612478	18.7199	291.87	0.064096
14/05/2014 00h	amplified drought	S1	0.00533129	18.338	291.488	0.0527427
14/05/2014 01h	amplified drought	S1	0.00382083	18.1348	291.285	0.0441467
14/05/2014 02h	amplified drought	S1	0.00484689	18.0769	291.227	0.0397896
14/05/2014 03h	amplified drought	S1	0.00629457	18.0828	291.233	0.0363483
14/05/2014 04h	amplified drought	S1	0.00481663	18.4043	291.554	0.0530161
14/05/2014 05h	amplified drought	S1	0.00260997	17.9523	291.102	0.0374589
14/05/2014 06h	amplified drought	S1	0.782193	18.0018	291.152	0.044872
14/05/2014 07h	amplified drought	S1	61.8257	19.2968	292.447	0.436143
14/05/2014 08h	amplified drought	S1	126.839	20.7329	293.883	1.07056
14/05/2014 09h	amplified drought	S1	126.451	22.2416	295.392	2.36744
14/05/2014 10h	amplified drought	S1	140.886	23.049	296.199	3.72897
14/05/2014 11h	amplified drought	S1	1504.18	23.553	296.703	5.00834
14/05/2014 12h	amplified drought	S1	761.491	22.7978	295.948	1.96719
14/05/2014 13h	amplified drought	S1	608.01	24.3081	297.458	5.29831
14/05/2014 14h	amplified drought	S1	1797.09	23.7574	296.907	2.80374
14/05/2014 15h	amplified drought	S1	1722.97	24.7065	297.857	4.98905
14/05/2014 16h	amplified drought	S1	1548.15	24.8995	298.05	7.99633
14/05/2014 17h	amplified drought	S1	1284.7	24.0153	297.165	9.74188
14/05/2014 18h	amplified drought	S1	510.905	24.6209	297.771	8.53217
11/05/2014 17h	amplified drought	S3	124.95	26.5358	299.686	14.2555
11/05/2014 18h	amplified drought	S3	101.984	26.473	299.623	15.9208
11/05/2014 19h	amplified drought	S3	88.2173	26.1391	299.289	8.62299
11/05/2014 20h	amplified drought	S3	55.6785	25.6542	298.804	6.55772
11/05/2014 21h	amplified drought	S3	3.10915	23.4911	296.641	0.149935
11/05/2014 22h	amplified drought	S3	0.00161957	22.6847	295.835	0.0661221
11/05/2014 23h	amplified drought	S3	0.00207152	22.1328	295.283	0.0508582
12/05/2014 00h	amplified drought	S3	0.000551394	21.8081	294.958	0.0526
12/05/2014 01h	amplified drought	S3	0.000930884	21.2631	294.413	0.0458172
12/05/2014 02h	amplified drought	S3	0.00110387	21.2249	294.375	0.04985
12/05/2014 03h	amplified drought	S3	0.00103576	21.078	294.228	0.0461479
12/05/2014 04h	amplified drought	S3	0.00150283	20.8415	293.992	0.0481161
12/05/2014 05h	amplified drought	S3	0.00280133	20.8328	293.983	0.0439455
12/05/2014 06h	amplified drought	S3	0.0632907	20.6879	293.838	0.0405157
12/05/2014 07h	amplified drought	S3	26.991	20.3964	293.546	0.100183
12/05/2014 08h	amplified drought	S3	460.247	22.2979	295.448	1.27713
12/05/2014 09h	amplified drought	S3	472.853	23.4673	296.617	1.51996
12/05/2014 10h	amplified drought	S3	545.86	24.767	297.917	6.99132
12/05/2014 11h	amplified drought	S3	692.863	23.7073	296.857	6.33957
12/05/2014 12h	amplified drought	S3	652.154	24.3942	297.544	6.1983
12/05/2014 13h	amplified drought	S3	615.436	25.305	298.455	9.57334
12/05/2014 14h	amplified drought	S3	427.454	25.2411	298.391	9.49423
12/05/2014 15h	amplified drought	S3	244.06	25.1271	298.277	7.56375
12/05/2014 16h	amplified drought	S3	170.881	25.4654	298.615	9.11659
12/05/2014 19h	amplified drought	S4	152.85	22.7832	295.933	0.901694
12/05/2014 20h	amplified drought	S4	40.9111	21.4062	294.556	0.205959
12/05/2014 21h	amplified drought	S4	0.25507	20.7736	293.924	0.0702522
12/05/2014 22h	amplified drought	S4	0.00398301	20.432	293.582	0.0309548
12/05/2014 23h	amplified drought	S4	0.0055345	20.0109	293.161	0.0309548
13/05/2014 00h	amplified drought	S4	0.00439394	19.4626	292.613	0.0245994
13/05/2014 01h	amplified drought	S4	0.00360568	19.0605	292.211	0.030198
13/05/2014 02h	amplified drought	S4	0.00510304	18.837	291.987	0.0265251
13/05/2014 03h	amplified drought	S4	0.00549773	18.4489	291.599	0.0230072
13/05/2014 04h	amplified drought	S4	0.00472477	18.2017	291.352	0.0182178
13/05/2014 05h	amplified drought	S4	0.00415921	18.1889	291.339	0.0179764
13/05/2014 06h	amplified drought	S4	9.81637	18.1669	291.317	0.0277844
13/05/2014 07h	amplified drought	S4	108.032	19.4352	292.585	0.908926
13/05/2014 08h	amplified drought	S4	423.736	20.5493	293.699	2.25538
13/05/2014 09h	amplified drought	S4	159.735	21.2283	294.378	1.40224
13/05/2014 10h	amplified drought	S4	1146.08	23.6127	296.763	8.36809
13/05/2014 11h	amplified drought	S4	1446.25	24.7065	297.857	10.7097
13/05/2014 12h	amplified drought	S4	1669.47	24.3297	297.48	15.7015
13/05/2014 13h	amplified drought	S4	1671.75	25.0129	298.163	13.3938
13/05/2014 14h	amplified drought	S4	1697.52	24.4363	297.586	13.7205
13/05/2014 15h	amplified drought	S4	1914.67	25.2437	298.394	14.8838
13/05/2014 16h	amplified drought	S4	1793.33	25.1401	298.29	10.2808
13/05/2014 17h	amplified drought	S4	800.739	22.5477	295.698	2.94079
18/05/2014 20h	amplified drought	S5	70.3115	22.3515	295.501	0.466104
18/05/2014 21h	amplified drought	S5	7.09532	21.5733	294.723	0.0796673
18/05/2014 22h	amplified drought	S5	0.00377574	20.5392	293.689	0.0372269
18/05/2014 23h	amplified drought	S5	0.00259264	19.8281	292.978	0.0301109
19/05/2014 00h	amplified drought	S5	0.00145015	19.585	292.735	0.0325712
19/05/2014 01h	amplified drought	S5	0.00291052	19.506	292.656	0.0286348
19/05/2014 02h	amplified drought	S5	0.00298535	19.6059	292.756	0.0268641
19/05/2014 03h	amplified drought	S5	0.00357931	19.45	292.6	0.0286298
19/05/2014 04h	amplified drought	S5	0.00480833	19.357	292.507	0.0182458
19/05/2014 05h	amplified drought	S5	0.00359662	19.1309	292.281	0.0252293
19/05/2014 06h	amplified drought	S5	1.6014	18.9743	292.124	0.0286284
19/05/2014 07h	amplified drought	S5	65.9189	19.3562	292.506	0.211574
19/05/2014 08h	amplified drought	S5	301.48	20.8394	293.989	1.4121
19/05/2014 09h	amplified drought	S5	531.383	22.322	295.472	6.30232
19/05/2014 10h	amplified drought	S5	690.282	23.2402	296.39	6.4241
19/05/2014 11h	amplified drought	S5	1365.07	24.7016	297.852	19.2432
19/05/2014 12h	amplified drought	S5	1587.99	25.1126	298.263	24.3146
19/05/2014 13h	amplified drought	S5	1724.13	26.0299	299.18	6.21095
19/05/2014 14h	amplified drought	S5	1769.37	26.8106	299.961	25.2461
19/05/2014 15h	amplified drought	S5	1289.7	26.0123	299.162	10.2705
19/05/2014 16h	amplified drought	S5	609.884	25.0377	298.188	6.29294
19/05/2014 17h	amplified drought	S5	690.4	24.9172	298.067	7.35904
19/05/2014 18h	amplified drought	S5	506.313	23.9888	297.139	3.93907
19/05/2014 19h	amplified drought	S5	87.3436	22.883	296.033	0.865026
15/05/2014 21h	amplified drought	S6	6.6394	20.4114	293.561	0.103292
15/05/2014 22h	amplified drought	S6	0.0134141	19.6535	292.803	0.0588406
15/05/2014 23h	amplified drought	S6	0.00739899	19.3196	292.47	0.0492576
16/05/2014 00h	amplified drought	S6	0.00436252	19.1599	292.31	0.050503
16/05/2014 01h	amplified drought	S6	0.004549	18.7845	291.934	0.0388836
16/05/2014 02h	amplified drought	S6	0.00595505	18.5441	291.694	0.0355384
16/05/2014 03h	amplified drought	S6	0.0075882	18.3295	291.479	0.0323374
16/05/2014 04h	amplified drought	S6	0.00764175	18.1799	291.33	0.0274768
16/05/2014 05h	amplified drought	S6	0.00661244	17.9877	291.138	0.0319692
16/05/2014 06h	amplified drought	S6	1.00029	17.8937	291.044	0.0275605
16/05/2014 07h	amplified drought	S6	82.9825	18.5675	291.717	0.372037
16/05/2014 08h	amplified drought	S6	89.7516	19.8807	293.031	0.596093
16/05/2014 09h	amplified drought	S6	213.843	21.656	294.806	3.53949
16/05/2014 10h	amplified drought	S6	171.394	22.941	296.091	5.12819
16/05/2014 11h	amplified drought	S6	1761.76	24.2106	297.361	6.00571
16/05/2014 12h	amplified drought	S6	1853.71	24.8318	297.982	8.30181
16/05/2014 14h	amplified drought	S6	1444.83	24.9565	298.107	8.48394
16/05/2014 15h	amplified drought	S6	1141.95	24.5388	297.689	7.27893
16/05/2014 16h	amplified drought	S6	659.31	24.2176	297.368	5.48124
16/05/2014 17h	amplified drought	S6	319.925	23.7399	296.89	3.42771
16/05/2014 18h	amplified drought	S6	112.302	22.9481	296.098	1.52207
16/05/2014 19h	amplified drought	S6	121.505	21.9461	295.096	0.80501
16/05/2014 20h	amplified drought	S6	116.751	21.2036	294.354	0.760341

## Sheet: isoprene summer
date	treament	trees code	PAR	TEMP (°C)	TEMP (K)	Emissions Rate isoprene (µgC.g(MS)-1.h-1)
18/07/2014 21h	natural drought	C1	50.7306	25.3427	298.493	2.22843
18/07/2014 22h	natural drought	C1	4.85124	24.4338	297.584	0.135779
18/07/2014 23h	natural drought	C1	0.000606047	23.6442	296.794	0.178613
19/07/2014 00h	natural drought	C1	0.000496981	23.6437	296.794	0.174565
19/07/2014 01h	natural drought	C1	0.000549035	23.2512	296.401	0.172548
19/07/2014 02h	natural drought	C1	0.000544139	23.0447	296.195	0.100646
19/07/2014 03h	natural drought	C1	0.000581257	22.943	296.093	0.037136
19/07/2014 04h	natural drought	C1	0.000815492	22.7637	295.914	0.101482
19/07/2014 05h	natural drought	C1	0.00096918	22.9457	296.096	0.0837902
19/07/2014 06h	natural drought	C1	0.611574	22.7926	295.943	0.0790843
19/07/2014 07h	natural drought	C1	51.5035	23.3957	296.546	1.36376
19/07/2014 08h	natural drought	C1	370.871	24.137	297.287	25.2571
19/07/2014 09h	natural drought	C1	355.977	24.9293	298.079	17.2406
19/07/2014 10h	natural drought	C1	774.427	25.7037	298.854	49.3143
19/07/2014 11h	natural drought	C1	694.26	26.5338	299.684	50.3757
19/07/2014 12h	natural drought	C1	1328.75	27.517	300.667	119.233
19/07/2014 13h	natural drought	C1	872.419	28.1009	301.251	83.7132
19/07/2014 14h	natural drought	C1	763.107	27.7481	300.898	63.2979
19/07/2014 15h	natural drought	C1	1068.94	27.6564	300.806	103.688
19/07/2014 16h	natural drought	C1	1609.95	29.1126	302.263	172.765
19/07/2014 17h	natural drought	C1	1120.63	28.2481	301.398	101.036
19/07/2014 18h	natural drought	C1	354.601	26.8757	300.026	23.258
19/07/2014 19h	natural drought	C1	386.22	26.4752	299.625	20.4748
15/07/2014 19h	natural drought	C2	290.237	27.2609	300.411	55.4879
15/07/2014 20h	natural drought	C2	72.8629	25.3011	298.451	3.68086
15/07/2014 21h	natural drought	C2	0.349464	24.0139	297.164	0.294402
15/07/2014 22h	natural drought	C2	0.00124803	23.5188	296.669	0.15088
15/07/2014 23h	natural drought	C2	0.000861349	23.2408	296.391	0.141586
16/07/2014 00h	natural drought	C2	0.00107949	22.7736	295.924	0.217167
16/07/2014 01h	natural drought	C2	0.00147001	22.2925	295.442	0.102357
16/07/2014 02h	natural drought	C2	0.00165825	22.0682	295.218	0.136393
16/07/2014 03h	natural drought	C2	0.00183175	22.0428	295.193	0.14541
16/07/2014 04h	natural drought	C2	0.00181441	21.8475	294.998	0.625939
16/07/2014 05h	natural drought	C2	0.530105	21.7107	294.861	0.633547
16/07/2014 06h	natural drought	C2	88.0713	22.2517	295.402	5.99925
16/07/2014 07h	natural drought	C2	416.761	25.1258	298.276
16/07/2014 08h	natural drought	C2	800.631	26.4107	299.561	34.109
16/07/2014 09h	natural drought	C2	1166.51	27.8603	301.01	81.3263
16/07/2014 10h	natural drought	C2	1479.95	28.5153	301.665	95.6284
16/07/2014 11h	natural drought	C2	1709.2	29.5897	302.74	110.009
16/07/2014 12h	natural drought	C2	1860.83	30.8081	303.958	133.315
16/07/2014 13h	natural drought	C2	1923.35	31.1159	304.266	142.995
16/07/2014 14h	natural drought	C2	1870.08	31.5441	304.694	139.046
16/07/2014 15h	natural drought	C2	1729.64	30.9769	304.127	149.504
16/07/2014 16h	natural drought	C2	1482.07	30.1989	303.349	141.233
16/07/2014 17h	natural drought	C2	1165.65	28.5463	301.696	114.257
16/07/2014 18h	natural drought	C2	805.961	28.0769	301.227	99.7392
14/07/2014 18h	natural drought	C3	784.863	25.3803	298.53	14.9416
14/07/2014 19h	natural drought	C3	230.205	24.3588	297.509	6.64477
14/07/2014 20h	natural drought	C3	168.503	23.8583	297.008	4.72045
14/07/2014 21h	natural drought	C3	24.2952	23.0933	296.243	0.473528
14/07/2014 22h	natural drought	C3	0.0098491	22.401	295.551	0.0684402
14/07/2014 23h	natural drought	C3	0.00201767	22.0873	295.237	0.0402606
15/07/2014 00h	natural drought	C3	0.00238203	21.9027	295.053	0.00191362
15/07/2014 01h	natural drought	C3	0.00255927	21.6217	294.772	0.0570454
15/07/2014 02h	natural drought	C3	0.00201147	21.4368	294.587	0.0293174
15/07/2014 03h	natural drought	C3	0.0027805	21.1037	294.254	0.0361116
15/07/2014 04h	natural drought	C3	0.00140046	20.9222	294.072	0.124575
15/07/2014 05h	natural drought	C3	0.00252765	20.8382	293.988	0.176616
15/07/2014 06h	natural drought	C3	7.87772	20.7457	293.896	0.170287
15/07/2014 07h	natural drought	C3	130.089	21.3465	294.496	7.12905
15/07/2014 08h	natural drought	C3	477.177	22.5882	295.738	40.5732
15/07/2014 09h	natural drought	C3	775.622	23.8825	297.032	128.482
15/07/2014 10h	natural drought	C3	1036.68	24.9495	298.099	41.4687
15/07/2014 11h	natural drought	C3	1634.17	27.0867	300.237	120.387
15/07/2014 12h	natural drought	C3	1792.37	27.7228	300.873	124.514
15/07/2014 13h	natural drought	C3	1777.95	27.7167	300.867	131.744
15/07/2014 14h	natural drought	C3	1865.62	29.0686	302.219	145.412
15/07/2014 15h	natural drought	C3	1790.4	29.2034	302.353	159.923
15/07/2014 16h	natural drought	C3	1178.05	28.452	301.602	47.5143
15/07/2014 17h	natural drought	C3	587.013	28.2055	301.356	40.6958
16/07/2014 22h	natural drought	C4	0.18993	23.4945	296.644	0.38084
16/07/2014 23h	natural drought	C4	0.000638269	23.2782	296.428	0.194586
17/07/2014 00h	natural drought	C4	0.000369327	22.7181	295.868	0.203466
17/07/2014 01h	natural drought	C4	0.000416486	22.7514	295.901	0.15576
17/07/2014 02h	natural drought	C4	0.000603567	22.3216	295.472	0.166641
17/07/2014 03h	natural drought	C4	0.0011303	21.8123	294.962	0.210315
17/07/2014 04h	natural drought	C4	0.00111171	21.8881	295.038	0.0913815
17/07/2014 05h	natural drought	C4	0.00128272	22.0096	295.16	0.186504
17/07/2014 06h	natural drought	C4	0.470487	21.5642	294.714	0.10646
17/07/2014 07h	natural drought	C4	48.5345	21.5441	294.694	1.12249
17/07/2014 08h	natural drought	C4	99.1863	22.9493	296.099	6.59344
17/07/2014 09h	natural drought	C4	707.982	24.941	298.091	27.0626
17/07/2014 10h	natural drought	C4	563.22	25.8725	299.022	29.1037
17/07/2014 11h	natural drought	C4	144.669	26.9155	300.065	70.1209
17/07/2014 12h	natural drought	C4	1703.97	29.1153	302.265	149.963
17/07/2014 13h	natural drought	C4	1858.93	29.8663	303.016	100.122
17/07/2014 14h	natural drought	C4	1909.15	30.1382	303.288	93.5984
17/07/2014 15h	natural drought	C4	1884.12	29.8261	302.976	87.2585
17/07/2014 16h	natural drought	C4	1750.72	29.6498	302.8	99.4895
17/07/2014 17h	natural drought	C4	892.679	28.5962	301.746	27.4286
17/07/2014 18h	natural drought	C4	1155.03	29.2343	302.384	59.8629
17/07/2014 19h	natural drought	C4	735.133	28.5197	301.67	36.6784
17/07/2014 21h	natural drought	C5	41.0157	25.5991	298.749	1.89331
17/07/2014 22h	natural drought	C5	0.0892037	24.4787	297.629	0.164161
17/07/2014 23h	natural drought	C5	0.00116872	23.9899	297.14	0.121595
18/07/2014 00h	natural drought	C5	0.000927033	23.4014	296.551	0.102556
18/07/2014 01h	natural drought	C5	0.000789473	23.2761	296.426	0.0522037
18/07/2014 02h	natural drought	C5	0.000679193	22.8899	296.04	0.00783156
18/07/2014 03h	natural drought	C5	0.000845245	22.6437	295.794	0.120243
18/07/2014 04h	natural drought	C5	0.000767159	22.5667	295.717	0.0556953
18/07/2014 05h	natural drought	C5	0.00134223	22.5623	295.712	0.0614786
18/07/2014 06h	natural drought	C5	0.646544	22.4961	295.646	0.0600766
18/07/2014 07h	natural drought	C5	90.7809	22.6913	295.841	2.53877
18/07/2014 08h	natural drought	C5	436.22	24.6028	297.753	19.3767
18/07/2014 09h	natural drought	C5	846.66	26.2485	299.398	85.4916
18/07/2014 10h	natural drought	C5	1213.55	27.8686	301.019	133.092
18/07/2014 11h	natural drought	C5	1517.56	28.4459	301.596	130.585
18/07/2014 12h	natural drought	C5	1737.59	29.5733	302.723	152.589
18/07/2014 13h	natural drought	C5	1875.47	30.1661	303.316	143.725
18/07/2014 14h	natural drought	C5	1872.59	30.3236	303.474	146.172
18/07/2014 15h	natural drought	C5	1757.01	30.7451	303.895	116.205
18/07/2014 16h	natural drought	C5	1558.72	30.8241	303.974	69.3883
18/07/2014 17h	natural drought	C5	1254.81	28.9029	302.053	51.9946
18/07/2014 18h	natural drought	C5	828.342	28.0477	301.198	41.5281
18/07/2014 19h	natural drought	C5	162.38	28.2439	301.394	86.8292
16/07/2014 21h	amplified drought	S1	5.10434	24.1844	297.334	0.511375
16/07/2014 22h	amplified drought	S1	0.00759303	23.4237	296.574	0.256095
16/07/2014 23h	amplified drought	S1	0.00331919	23.0707	296.221	0.244394
17/07/2014 00h	amplified drought	S1	0.00446521	22.7842	295.934	0.188279
17/07/2014 01h	amplified drought	S1	0.00446521	22.7842	295.934	0.162924
17/07/2014 02h	amplified drought	S1	0.0014185	22.1639	295.314	0.181397
17/07/2014 03h	amplified drought	S1	0.00320023	22.1201	295.27	0.114088
17/07/2014 04h	amplified drought	S1	0.00133957	22.1744	295.324	0.165623
17/07/2014 05h	amplified drought	S1	0.0113339	21.9945	295.145	0.097989
17/07/2014 06h	amplified drought	S1	22.8381	21.7319	294.882	0.333656
17/07/2014 07h	amplified drought	S1	152.101	22.9593	296.109	2.50556
17/07/2014 08h	amplified drought	S1	648.005	25.1908	298.341	7.30529
17/07/2014 09h	amplified drought	S1	151.331	25.6313	298.781	8.03392
17/07/2014 10h	amplified drought	S1	1355.85	27.0447	300.195	28.233
17/07/2014 11h	amplified drought	S1	1606.87	27.7334	300.883	35.9393
17/07/2014 12h	amplified drought	S1	1771.01	29.4008	302.551	53.0136
17/07/2014 13h	amplified drought	S1	1773.85	29.5815	302.732	63.149
17/07/2014 14h	amplified drought	S1	1762.33	29.0395	302.19	31.4394
17/07/2014 15h	amplified drought	S1	1717.95	29.6655	302.815	84.0971
17/07/2014 16h	amplified drought	S1	1414.69	30.5719	303.722	73.8173
17/07/2014 17h	amplified drought	S1	1229.43	30.5985	303.748	82.2212
17/07/2014 18h	amplified drought	S1	764.585	29.9151	303.065	79.3513
14/07/2014 17h	amplified drought	S3	384.93	28.0592	301.209	82.7918
14/07/2014 18h	amplified drought	S3	134.555	27.7103	300.86	56.9809
14/07/2014 19h	amplified drought	S3	80.0103	24.7439	297.894	9.14263
14/07/2014 20h	amplified drought	S3	41.0832	24.3989	297.549	2.85598
14/07/2014 21h	amplified drought	S3	0.946492	23.1452	296.295	0.139597
14/07/2014 22h	amplified drought	S3	0.00437489	22.5782	295.728	0.0819759
14/07/2014 23h	amplified drought	S3	0.00180376	22.38	295.53	0.0925198
15/07/2014 00h	amplified drought	S3	0.00475432	22.1354	295.285	0.0447621
15/07/2014 01h	amplified drought	S3	0.00495783	21.766	294.916	0.0437623
15/07/2014 02h	amplified drought	S3	0.0017796	21.4701	294.62	0.0685269
15/07/2014 03h	amplified drought	S3	0.000466707	21.2452	294.395	0.287964
15/07/2014 04h	amplified drought	S3	0.0046504	21.1426	294.293	0.194593
15/07/2014 05h	amplified drought	S3	0.0200795	21.0258	294.176	0.230724
15/07/2014 06h	amplified drought	S3	15.9175	21.0273	294.177	0.787692
15/07/2014 07h	amplified drought	S3	77.7159	21.4669	294.617	5.11598
15/07/2014 08h	amplified drought	S3	113.013	22.6108	295.761	16.5097
15/07/2014 09h	amplified drought	S3	164.046	23.4208	296.571	7.47191
15/07/2014 10h	amplified drought	S3	549.037	25.4925	298.642	23.6189
15/07/2014 11h	amplified drought	S3	347.935	25.818	298.968	15.5465
15/07/2014 12h	amplified drought	S3	1322.34	27.4723	300.622	48.9455
15/07/2014 13h	amplified drought	S3	1659.33	27.3464	300.496	46.6182
15/07/2014 14h	amplified drought	S3	1219.18	28.9446	302.095	75.7219
15/07/2014 15h	amplified drought	S3	1536.54	28.2425	301.392	43.2143
15/07/2014 16h	amplified drought	S3	782.156	28.3668	301.517	39.1374
16/07/2014 09h	amplified drought	S4	992.32	26.534	299.684	17.1828
16/07/2014 10h	amplified drought	S4	285.168	25.8486	298.999	4.88784
16/07/2014 11h	amplified drought	S4	157.82	26.3701	299.52	15.1774
16/07/2014 12h	amplified drought	S4	1136.51	29.6102	302.76	79.6858
16/07/2014 13h	amplified drought	S4	561.959	29.8966	303.047	110.266
16/07/2014 14h	amplified drought	S4	1789.97	30.9226	304.073	119.321
16/07/2014 15h	amplified drought	S4	1689.91	31.6481	304.798	99.3842
16/07/2014 16h	amplified drought	S4	1488.34	31.1851	304.335	92.4028
16/07/2014 17h	amplified drought	S4	1074.29	28.5398	301.69	44.2223
16/07/2014 18h	amplified drought	S4	844.566	29.3615	302.512	82.7771
16/07/2014 19h	amplified drought	S4	357.927	28.3077	301.458	51.5536
18/07/2014 20h	amplified drought	S5	33.7129	26.1643	299.314	1.54979
18/07/2014 21h	amplified drought	S5	1.85088	25.0201	298.17	0.245107
18/07/2014 22h	amplified drought	S5	0.00325973	24.1883	297.338	0.16954
18/07/2014 23h	amplified drought	S5	0.0061162	23.9073	297.057	0.106218
19/07/2014 00h	amplified drought	S5	0.00231151	23.7893	296.939	0.091348
19/07/2014 01h	amplified drought	S5	0.00423733	23.3954	296.545	0.126675
19/07/2014 02h	amplified drought	S5	0.00834625	23.3437	296.494	0.0585392
19/07/2014 03h	amplified drought	S5	0.0100295	23.1526	296.303	0.125163
19/07/2014 04h	amplified drought	S5	0.0111311	23.3399	296.49	0.0787958
19/07/2014 05h	amplified drought	S5	0.6593	23.2472	296.397	0.107725
19/07/2014 06h	amplified drought	S5	13.6969	23.5469	296.697	0.485623
19/07/2014 07h	amplified drought	S5	131.062	23.8708	297.021	3.04949
19/07/2014 08h	amplified drought	S5	318.309	25.6626	298.813	14.1149
19/07/2014 09h	amplified drought	S5	700.248	26.1611	299.311	37.5075
19/07/2014 10h	amplified drought	S5	679.664	26.7661	299.916	38.7036
19/07/2014 11h	amplified drought	S5	603.096	27.0822	300.232	50.4362
19/07/2014 12h	amplified drought	S5	728.372	28.2086	301.359	105.593
19/07/2014 13h	amplified drought	S5	427.196	27.7456	300.896	70.6065
19/07/2014 14h	amplified drought	S5	479.386	27.3827	300.533	46.3431
19/07/2014 15h	amplified drought	S5	1136.78	29.3925	302.542	115.312
19/07/2014 16h	amplified drought	S5	601.119	29.6149	302.765	65.9829
19/07/2014 17h	amplified drought	S5	357.733	27.9469	301.097	25.6303
19/07/2014 18h	amplified drought	S5	248.632	26.8017	299.952	19.3954
17/07/2014 20h	amplified drought	S6	73.4635	26.4111	299.561	2.93675
17/07/2014 21h	amplified drought	S6	3.39551	24.9922	298.142	0.323155
17/07/2014 22h	amplified drought	S6	0.0155429	24.2253	297.375	0.253618
17/07/2014 23h	amplified drought	S6	0.0054307	23.6868	296.837	0.157697
18/07/2014 00h	amplified drought	S6	0.00673777	23.4698	296.62	0.155056
18/07/2014 01h	amplified drought	S6	0.00517555	23.173	296.323	0.123294
18/07/2014 02h	amplified drought	S6	0.0154012	22.8097	295.96	0.244274
18/07/2014 03h	amplified drought	S6	0.0146305	22.679	295.829	0.188446
18/07/2014 04h	amplified drought	S6	0.0133028	22.5685	295.718	0.123139
18/07/2014 05h	amplified drought	S6	0.00894783	22.5039	295.654	0.139569
18/07/2014 06h	amplified drought	S6	21.6028	22.5285	295.679	0.681737
18/07/2014 07h	amplified drought	S6	142.2	24.7504	297.9	21.9206
18/07/2014 08h	amplified drought	S6	247.791	25.8919	299.042	47.7998
18/07/2014 09h	amplified drought	S6	437.807	27.4847	300.635	55.5411
18/07/2014 10h	amplified drought	S6	1395.97	28.0313	301.181	53.7009
18/07/2014 11h	amplified drought	S6	1605.3	28.9002	302.05	52.331
18/07/2014 12h	amplified drought	S6	1709.18	29.5982	302.748	94.6086
18/07/2014 13h	amplified drought	S6	1728.18	30.2944	303.444	126.669
18/07/2014 14h	amplified drought	S6	1848.82	30.751	303.901	94.286
18/07/2014 15h	amplified drought	S6	305.109	30.3271	303.477	113.997
18/07/2014 16h	amplified drought	S6	1250.59	29.1152	302.265	32.7642
18/07/2014 17h	amplified drought	S6	986.92	30.1312	303.281	62.0019
18/07/2014 18h	amplified drought	S6	668.793	29.9903	303.14	58.2702
18/07/2014 19h	amplified drought	S6	215.766	28.0747	301.225	6.65999

## Sheet: isoprene autumn
date	treatment	trees code	PAR	TEMP (°C)	TEMP (K)	Emissions Rate isoprene (µgC.g(MS)-1.h-1)
26/10/2013 19h	natural drought	C1	0.0459538	22.3075	295.458	0.00642303
26/10/2013 20h	natural drought	C1	0.00513676	21.8153	294.965	0.00721717
26/10/2013 21h	natural drought	C1	0.00339211	21.4997	294.65	0.00735533
26/10/2013 22h	natural drought	C1	0.00744189	trees code+G:N	294.513	0.00352977
26/10/2013 23h	natural drought	C1	0.00704861	21.2819	294.432	0.00566136
27/10/2013 00h	natural drought	C1	0.0031554	21.05	294.2	0.00370934
27/10/2013 01h	natural drought	C1	0.00784299	20.9689	294.119	0.00472674
27/10/2013 02h	natural drought	C1	0.00912455	20.8649	294.015	0.00364671
27/10/2013 03h	natural drought	C1	0.00693572	20.8796	294.03	0.00239585
27/10/2013 04h	natural drought	C1	0.0112585	21.0113	294.161	0.00321001
27/10/2013 05h	natural drought	C1	0.0107643	21.2223	294.372	0.00334809
27/10/2013 06h	natural drought	C1	0.00872731	21.2334	294.383	0.00189088
27/10/2013 07h	natural drought	C1	0.00873984	21.1651	294.315	0.00251912
27/10/2013 08h	natural drought	C1	13.4458	21.0856	294.236	0.00483344
27/10/2013 09h	natural drought	C1	248.222	22.3484	295.498	0.886358
27/10/2013 10h	natural drought	C1	138.832	23.2606	296.411	5.33409
27/10/2013 11h	natural drought	C1	191.777	23.6609	296.811	2.23696
27/10/2013 12h	natural drought	C1	439.234	23.5896	296.74	1.16142
27/10/2013 13h	natural drought	C1	850.223	24.8491	297.999	3.85651
27/10/2013 14h	natural drought	C1	878.376	25.4939	298.644	4.51789
27/10/2013 15h	natural drought	C1	1058.53	26.3407	299.491	4.00376
27/10/2013 16h	natural drought	C1	385.053	25.2028	298.353	3.01544
27/10/2013 17h	natural drought	C1	270.138	25.1451	298.295	1.86895
27/10/2013 18h	natural drought	C1	52.7722	23.3831	296.533	0.189346
18/10/2013 20h	natural drought	C2	0.00776519	21.3177	294.468	0.0193493
18/10/2013 21h	natural drought	C2	0.00641513	20.9045	294.055	0.014886
18/10/2013 22h	natural drought	C2	0.00604657	21.1145	294.264	0.0144329
18/10/2013 23h	natural drought	C2	0.00500963	21.1181	294.268	0.0123192
19/10/2013 00h	natural drought	C2	0.0071727	21.1912	294.341	0.0149385
19/10/2013 01h	natural drought	C2	0.00899787	21.0764	294.226	0.0196122
19/10/2013 02h	natural drought	C2	0.00563119	20.9176	294.068	0.0151332
19/10/2013 03h	natural drought	C2	0.0112295	20.9832	294.133	0.0162687
19/10/2013 04h	natural drought	C2	0.00516012	20.8831	294.033	0.0145719
19/10/2013 05h	natural drought	C2	0.0057474	20.6621	293.812	0.0119547
19/10/2013 06h	natural drought	C2	0.00713241	20.4356	293.586	0.00804965
19/10/2013 07h	natural drought	C2	0.0299808	20.3693	293.519	0.0107068
19/10/2013 08h	natural drought	C2	48.6386	20.7672	293.917	0.045211
19/10/2013 09h	natural drought	C2	231.125	22.5376	295.688	0.856392
19/10/2013 10h	natural drought	C2	617.838	23.7388	296.889	5.41161
19/10/2013 11h	natural drought	C2	819.845	24.2588	297.409	5.13176
19/10/2013 12h	natural drought	C2	1236.89	25.2212	298.371	7.26566
19/10/2013 13h	natural drought	C2	923.578	25.4438	298.594	4.11372
19/10/2013 14h	natural drought	C2	1006.93	25.2313	298.381	4.42912
19/10/2013 15h	natural drought	C2	341.708	25.0296	298.18	3.83544
19/10/2013 16h	natural drought	C2	548.282	24.6682	297.818	2.78557
19/10/2013 17h	natural drought	C2	183.087	23.5131	296.663	0.559126
19/10/2013 18h	natural drought	C2	81.0206	22.9055	296.056	0.28199
19/10/2013 19h	natural drought	C2	0.171913	21.3395	294.49	0.0194097
16/10/2013 01h	natural drought	C3	0.00778381	20.0394	293.189	0.0351917
16/10/2013 02h	natural drought	C3	0.0117082	20.3262	293.476	0.0290026
16/10/2013 03h	natural drought	C3	0.0147983	20.4023	293.552	0.026107
16/10/2013 04h	natural drought	C3	0.0160551	20.3245	293.475	0.0213845
16/10/2013 05h	natural drought	C3	0.0205077	20.187	293.337	0.0200903
16/10/2013 06h	natural drought	C3	0.00612985	20.3009	293.451	0.029566
16/10/2013 07h	natural drought	C3	0.0037749	20.2166	293.367	0.0241633
16/10/2013 08h	natural drought	C3	4.34017	20.3663	293.516	0.0221239
16/10/2013 09h	natural drought	C3	198.331	21.1501	294.3	0.740064
16/10/2013 10h	natural drought	C3	436.816	22.525	295.675	2.8294
16/10/2013 11h	natural drought	C3	656.967	23.3899	296.54	4.34224
16/10/2013 12h	natural drought	C3	919.178	24.2205	297.37	3.84246
16/10/2013 13h	natural drought	C3	947.797	23.8048	296.955	4.34247
16/10/2013 14h	natural drought	C3	973.234	24.063	297.213	1.92874
16/10/2013 15h	natural drought	C3	190.735	23.5335	296.683	2.71552
16/10/2013 16h	natural drought	C3	744.942	23.9472	297.097	2.0859
16/10/2013 17h	natural drought	C3	177.997	22.7603	295.91	0.699641
16/10/2013 18h	natural drought	C3	40.9235	21.2231	294.373	0.0847422
16/10/2013 19h	natural drought	C3	9.03071	20.906	294.056	0.0138451
16/10/2013 20h	natural drought	C3	0.00343126	20.6258	293.776	0.0124957
16/10/2013 21h	natural drought	C3	0.00245336	20.513	293.663	0.00941518
16/10/2013 22h	natural drought	C3	0.0043577	20.1745	293.325	0.00367496
16/10/2013 23h	natural drought	C3	0.0125584	20.1488	293.299	0.0427664
15/10/2013 00h	natural drought	C3	0.00608258	20.0167	293.167	0.0393124
20/10/2013 21h	natural drought	C4	0.0259938	21.0124	294.162	0.00498096
20/10/2013 22h	natural drought	C4	0.0211484	20.7849	293.935	0.00572939
20/10/2013 23h	natural drought	C4	0.067014	20.7731	293.923	0.00552611
21/10/2013 00h	natural drought	C4	0.00485588	21.0261	294.176	0.0142332
21/10/2013 01h	natural drought	C4	0.0378152	20.9055	294.055	0.00849876
21/10/2013 02h	natural drought	C4	0.0187045	20.8885	294.039	0.0112728
21/10/2013 03h	natural drought	C4	0.0434124	20.7664	293.916	0.00606814
21/10/2013 04h	natural drought	C4	0.186227	20.7867	293.937	0.00442485
21/10/2013 05h	natural drought	C4	0.15785	20.6128	293.763	0.00571818
21/10/2013 06h	natural drought	C4	0.171815	20.8444	293.994	0.00428901
21/10/2013 07h	natural drought	C4	0.0619379	20.8752	294.025	0.00370441
21/10/2013 08h	natural drought	C4	1.34823	20.5461	293.696	0.00664285
21/10/2013 09h	natural drought	C4	66.5843	21.0515	294.201	0.0292835
21/10/2013 10h	natural drought	C4	120.184	21.6466	294.797	0.0592182
21/10/2013 11h	natural drought	C4	498.154	23.188	296.338	0.835107
21/10/2013 12h	natural drought	C4	261.859	23.3206	296.471	0.721942
21/10/2013 13h	natural drought	C4	438.466	23.8916	297.042	1.46648
21/10/2013 14h	natural drought	C4	851.675	25.2277	298.378	3.8594
21/10/2013 15h	natural drought	C4	461.249	25.3413	298.491	1.53979
21/10/2013 16h	natural drought	C4	163.083	24.0333	297.183	0.666778
21/10/2013 17h	natural drought	C4	130.22	23.5987	296.749	0.353558
21/10/2013 18h	natural drought	C4	39.956	22.4732	295.623	0.0483804
21/10/2013 19h	natural drought	C4	0.682787	21.6943	294.844	0.00711721
21/10/2013 20h	natural drought	C4	0.129465	21.1618	294.312	0.00530418
23/10/2013 19h	natural drought	C5	0.0112044	22.3839	295.534	0.0184832
23/10/2013 20h	natural drought	C5	0.00266057	21.8761	295.026	0.0101232
23/10/2013 21h	natural drought	C5	0.00766627	21.4741	294.624	0.00748308
23/10/2013 22h	natural drought	C5	0.00409372	21.3003	294.45	0.0108232
23/10/2013 23h	natural drought	C5	0.0194091	21.1806	294.331	0.0356453
24/10/2013 00h	natural drought	C5	0.00958644	21.0193	294.169	0.0254783
24/10/2013 01h	natural drought	C5	0.0117415	20.9373	294.087	0.0247338
24/10/2013 02h	natural drought	C5	0.0164027	20.9068	294.057	0.018037
24/10/2013 03h	natural drought	C5	0.0157257	20.8795	294.029	0.019817
24/10/2013 04h	natural drought	C5	0.00975805	21.1323	294.282	0.0192272
24/10/2013 05h	natural drought	C5	0.0182055	21.3482	294.498	0.0106795
24/10/2013 06h	natural drought	C5	0.0137541	21.4406	294.591	0.0105491
24/10/2013 07h	natural drought	C5	0.0107943	21.6056	294.756	0.0104728
24/10/2013 08h	natural drought	C5	17.8341	20.9793	294.129	0.0109132
24/10/2013 09h	natural drought	C5	95.7984	21.4562	294.606	0.0385747
24/10/2013 10h	natural drought	C5	167.394	22.1345	295.284	0.478034
24/10/2013 11h	natural drought	C5	198.331	22.4886	295.639	0.947733
24/10/2013 12h	natural drought	C5	360.313	23.4566	296.607	1.17659
24/10/2013 13h	natural drought	C5	646.177	24.0563	297.206	1.4264
24/10/2013 14h	natural drought	C5	336.601	24.0297	297.18	1.1675
24/10/2013 15h	natural drought	C5	336.159	24.6895	297.839	1.65725
24/10/2013 16h	natural drought	C5	164.635	23.8672	297.017	0.514201
24/10/2013 17h	natural drought	C5	187.046	23.8589	297.009	0.60924
24/10/2013 18h	natural drought	C5	13.4974	23.3325	296.482	0.0310629
20/10/2013 09h	amplified drought	S1	86.7415	21.4948	294.645	0.125293
20/10/2013 10h	amplified drought	S1	329.654	22.5858	295.736	0.658671
20/10/2013 11h	amplified drought	S1	425.259	23.5462	296.696	2.74374
20/10/2013 12h	amplified drought	S1	632.531	24.3306	297.481	4.75954
20/10/2013 13h	amplified drought	S1	720.336	25.9735	299.124	8.28798
20/10/2013 14h	amplified drought	S1	554.956	25.2846	298.435	5.7907
20/10/2013 15h	amplified drought	S1	181.663	24.0009	297.151	2.09825
20/10/2013 16h	amplified drought	S1	184.476	23.5981	296.748	1.34417
20/10/2013 17h	amplified drought	S1	87.5907	22.7856	295.936	0.188531
20/10/2013 18h	amplified drought	S1	5.28489	21.9607	295.111	0.0281205
20/10/2013 19h	amplified drought	S1	0.0168252	21.4744	294.624	0.00789858
20/10/2013 20h	amplified drought	S1	0.00827091	21.1725	294.322	0.00920712
20/10/2013 21h	amplified drought	S1	0.00898234	20.991	294.141	0.00817811
20/10/2013 22h	amplified drought	S1	0.00492042	20.3956	293.546	0.00494118
20/10/2013 23h	amplified drought	S1	0.00771627	21.4179	294.568	0.00633808
21/10/2013 00h	amplified drought	S1	0.00569345	21.5088	294.659	0.00966938
21/10/2013 01h	amplified drought	S1	0.0108786	21.1274	294.277	0.00727234
21/10/2013 02h	amplified drought	S1	0.00844719	21.4234	294.573	0.00746687
21/10/2013 03h	amplified drought	S1	0.00723518	21.1457	294.296	0.00522189
21/10/2013 04h	amplified drought	S1	0.00756609	20.8887	294.039	0.00524289
21/10/2013 05h	amplified drought	S1	0.00204125	20.8576	294.008	0.00563744
21/10/2013 06h	amplified drought	S1	0.00473875	21.0921	294.242	0.00448385
21/10/2013 07h	amplified drought	S1	0.00625891	21.0267	294.177	0.00906822
21/10/2013 08h	amplified drought	S1	26.6267	20.8889	294.039	0.0159806
16/10/2013 00h	amplified drought	S3	0.0065037	20.2156	293.366	0.0301572
16/10/2013 01h	amplified drought	S3	0.00474819	20.2952	293.445	0.0172423
16/10/2013 02h	amplified drought	S3	0.00762576	20.4426	293.593	0.024563
16/10/2013 03h	amplified drought	S3	0.010862	20.466	293.616	0.0218209
16/10/2013 04h	amplified drought	S3	0.00913649	20.3345	293.485	0.0181925
16/10/2013 05h	amplified drought	S3	0.00787998	20.3507	293.501	0.0209441
16/10/2013 06h	amplified drought	S3	0.00536298	20.4409	293.591	0.0412976
16/10/2013 07h	amplified drought	S3	0.00628588	20.452	293.602	0.0162499
16/10/2013 08h	amplified drought	S3	15.7163	20.503	293.653	0.0483706
16/10/2013 09h	amplified drought	S3	56.6324	21.0008	294.151	0.194679
16/10/2013 10h	amplified drought	S3	296.996	21.8139	294.964	0.96465
16/10/2013 11h	amplified drought	S3	597.413	23.1752	296.325	7.47661
16/10/2013 12h	amplified drought	S3	638.018	23.4259	296.576	7.8026
16/10/2013 13h	amplified drought	S3	678.787	23.8632	297.013	12.1815
16/10/2013 14h	amplified drought	S3	421.906	24.6794	297.829	13.3629
16/10/2013 15h	amplified drought	S3	272.964	24.3981	297.548	10.7982
16/10/2013 16h	amplified drought	S3	522.91	25.7129	298.863	6.50628
16/10/2013 17h	amplified drought	S3	63.0551	24.0752	297.225	0.890951
16/10/2013 18h	amplified drought	S3	12.7898	21.2417	294.392	0.0452463
16/10/2013 19h	amplified drought	S3	0.193234	20.9747	294.125	0.00999594
16/10/2013 20h	amplified drought	S3	0.00775914	20.7813	293.931	0.0277315
16/10/2013 21h	amplified drought	S3	0.0104417	20.5395	293.69	0.0230766
16/10/2013 22h	amplified drought	S3	0.00904663	20.2461	293.396	0.0240147
16/10/2013 23h	amplified drought	S3	0.00287238	20.2157	293.366	0.0216093
18/10/2013 21h	amplified drought	S4	0.00726202	21.3151	294.465	0.0126453
18/10/2013 22h	amplified drought	S4	0.00480429	21.2036	294.354	0.0124914
18/10/2013 23h	amplified drought	S4	0.00785356	21.3794	294.529	0.0132293
19/10/2013 00h	amplified drought	S4	0.00671882	21.3768	294.527	0.0127736
19/10/2013 01h	amplified drought	S4	0.0040652	21.4153	294.565	0.0114483
19/10/2013 02h	amplified drought	S4	0.00542593	21.2039	294.354	0.0143961
19/10/2013 03h	amplified drought	S4	0.00355658	21.0833	294.233	0.010406
19/10/2013 04h	amplified drought	S4	0.00579281	21.1205	294.27	0.00621671
19/10/2013 05h	amplified drought	S4	0.00922424	21.0445	294.195	0.00683535
19/10/2013 06h	amplified drought	S4	0.00606859	20.7632	293.913	0.00439082
19/10/2013 07h	amplified drought	S4	0.00308703	20.6101	293.76	0.00835735
19/10/2013 08h	amplified drought	S4	2.41506	20.5499	293.7	0.00959038
19/10/2013 09h	amplified drought	S4	104.498	21.6687	294.819	0.106599
19/10/2013 10h	amplified drought	S4	340.855	22.6199	295.77	0.293858
19/10/2013 11h	amplified drought	S4	599.247	23.1652	296.315	0.753869
19/10/2013 12h	amplified drought	S4	579.066	23.4654	296.615	1.68138
19/10/2013 13h	amplified drought	S4	382.807	24.0182	297.168	1.91267
19/10/2013 14h	amplified drought	S4	613.01	24.4633	297.613	1.84688
19/10/2013 15h	amplified drought	S4	761.928	25.7938	298.944	3.42761
19/10/2013 16h	amplified drought	S4	396.896	25.9984	299.148	4.27819
19/10/2013 17h	amplified drought	S4	423.103	24.7127	297.863	1.93386
19/10/2013 18h	amplified drought	S4	95.2377	23.5533	296.703	0.717437
19/10/2013 19h	amplified drought	S4	12.6899	22.1904	295.34	0.120455
19/10/2013 20h	amplified drought	S4	0.00649623	21.3164	294.466	0.0130576
26/10/2013 20h	amplified drought	S5	0.0116298	21.8309	294.981	0.0103646
26/10/2013 21h	amplified drought	S5	0.0118287	21.4378	294.588	0.0146754
26/10/2013 22h	amplified drought	S5	0.00508113	21.2509	294.401	0.00930877
26/10/2013 23h	amplified drought	S5	0.00313209	21.2157	294.366	0.019672
27/10/2013 00h	amplified drought	S5	0.00939107	21.1226	294.273	0.0109028
27/10/2013 01h	amplified drought	S5	0.00299051	20.9596	294.11	0.00534319
27/10/2013 02h	amplified drought	S5	0.0088475	20.8188	293.969	0.00938867
27/10/2013 03h	amplified drought	S5	0.00977434	20.8136	293.964	0.00435344
27/10/2013 04h	amplified drought	S5	0.00639835	20.9138	294.064	0.00809621
27/10/2013 05h	amplified drought	S5	0.018596	21.0196	294.17	0.00865576
27/10/2013 06h	amplified drought	S5	0.0178523	21.3033	294.453	0.00601095
27/10/2013 07h	amplified drought	S5	0.00594966	21.0735	294.224	0.00546033
27/10/2013 08h	amplified drought	S5	0.0463342	21.081	294.231	0.00545187
27/10/2013 09h	amplified drought	S5	44.9171	21.0317	294.182	0.0343115
27/10/2013 10h	amplified drought	S5	172.43	21.7337	294.884	0.0763679
27/10/2013 11h	amplified drought	S5	409.488	22.4131	295.563	0.15373
27/10/2013 12h	amplified drought	S5	567.575	24.1693	297.319	1.34474
27/10/2013 13h	amplified drought	S5	453.326	24.6696	297.82	2.87564
27/10/2013 14h	amplified drought	S5	564.466	24.6175	297.767	2.39893
27/10/2013 15h	amplified drought	S5	880.155	26.8859	300.036	8.94018
27/10/2013 16h	amplified drought	S5	538.829	26.6376	299.788	8.09517
27/10/2013 17h	amplified drought	S5	182.531	24.9431	298.093	2.63549
27/10/2013 18h	amplified drought	S5	111.512	24.2343	297.384	4.43741
27/10/2013 19h	amplified drought	S5	3.20673	22.365	295.515	0.0588149
23/10/2013 20h	amplified drought	S6	0.00607828	21.9299	295.08	0.0181519
23/10/2013 21h	amplified drought	S6	0.00207041	21.5763	294.726	0.00962891
23/10/2013 22h	amplified drought	S6	0.00479831	21.6403	294.79	0.0091441
23/10/2013 23h	amplified drought	S6	0.00950348	21.5529	294.703	0.0344915
24/10/2013 00h	amplified drought	S6	0.00228666	21.4343	294.584	0.0116043
24/10/2013 01h	amplified drought	S6	0.00367061	21.4337	294.584	0.0108307
24/10/2013 02h	amplified drought	S6	0.0115782	21.3783	294.528	0.0102164
24/10/2013 03h	amplified drought	S6	0.00724714	21.3808	294.531	0.0120703
24/10/2013 04h	amplified drought	S6	0.00957811	21.403	294.553	0.0115089
24/10/2013 05h	amplified drought	S6	0.00589888	21.5995	294.749	0.0174411
24/10/2013 06h	amplified drought	S6	0.00684384	21.703	294.853	0.00667278
24/10/2013 07h	amplified drought	S6	0.00761248	21.5351	294.685	0.0165126
24/10/2013 08h	amplified drought	S6	10.9306	20.9702	294.12	0.00817726
24/10/2013 09h	amplified drought	S6	128.582	21.7017	294.852	0.0619277
24/10/2013 10h	amplified drought	S6	175.332	22.2175	295.367	0.643768
24/10/2013 11h	amplified drought	S6	188.113	22.6036	295.754	1.08524
24/10/2013 12h	amplified drought	S6	348.376	23.39	296.54	2.38902
24/10/2013 13h	amplified drought	S6	369.783	24.1279	297.278	3.95539
24/10/2013 14h	amplified drought	S6	247.301	24.5032	297.653	3.49228
24/10/2013 15h	amplified drought	S6	210.451	24.4331	297.583	4.7217
24/10/2013 16h	amplified drought	S6	169.074	24.8597	298.01	5.38984
24/10/2013 17h	amplified drought	S6	114.388	24.0299	297.18	0.709752
24/10/2013 18h	amplified drought	S6	61.5407	23.7295	296.879	0.31911
24/10/2013 19h	amplified drought	S6	2.09856	23.2309	296.381	0.0273082

## Sheet: methanol spring
date	treatment	trees code	PAR	TEMP (°C)	TEMP (K)	Emissions Rate methanol (µgC.g(MS)-1.h-1)
12/05/2014 20h	natural drought	C2	72.8861	22.0939	295.244	0.122023
12/05/2014 21h	natural drought	C2	10.7855	21.2159	294.366	0.0506729
12/05/2014 22h	natural drought	C2	0.00285425	20.6017	293.752	0.0449103
12/05/2014 23h	natural drought	C2	0.00137445	20.4121	293.562	0.0474578
13/05/2014 00h	natural drought	C2	0.00165702	19.7439	292.894	0.0457465
13/05/2014 01h	natural drought	C2	0.00201519	19.1374	292.287	0.0456119
13/05/2014 02h	natural drought	C2	0.00104849	18.991	292.141	0.0472804
13/05/2014 03h	natural drought	C2	0.00130132	18.5595	291.71	0.044505
13/05/2014 04h	natural drought	C2	0.000975496	18.286	291.436	0.0465956
13/05/2014 05h	natural drought	C2	0.00275369	18.1874	291.337	0.054893
13/05/2014 06h	natural drought	C2	0.15613	18.1829	291.333	0.0430193
13/05/2014 07h	natural drought	C2	47.1451	18.4127	291.563	0.0579816
13/05/2014 08h	natural drought	C2	111.549	19.6496	292.8	0.557098
13/05/2014 09h	natural drought	C2	146.192	20.8553	294.005	0.382137
13/05/2014 10h	natural drought	C2	233.505	22.0209	295.171	0.282647
13/05/2014 11h	natural drought	C2	661.713	24.0583	297.208	0.23039
13/05/2014 12h	natural drought	C2	1086.46	26.1197	299.27	0.314927
13/05/2014 13h	natural drought	C2	1193.67	26.1605	299.311	0.520685
13/05/2014 14h	natural drought	C2	1659.61	24.8671	298.017	0.558927
13/05/2014 15h	natural drought	C2	1913.93	24.7149	297.865	0.643151
13/05/2014 16h	natural drought	C2	2003.56	25.7397	298.89	0.538002
13/05/2014 17h	natural drought	C2	1951.54	24.2279	297.378	0.420546
13/05/2014 18h	natural drought	C2	286.744	23.5522	296.702	0.389764
11/05/2014 17h	natural drought	C3	367.993	25.6111	298.761	0.599741
11/05/2014 18h	natural drought	C3	212.502	25.5295	298.679	0.572447
11/05/2014 19h	natural drought	C3	154.645	24.8677	298.018	0.480275
11/05/2014 20h	natural drought	C3	39.939	23.7669	296.917	0.220003
11/05/2014 21h	natural drought	C3	0.138401	22.803	295.953	0.0804895
11/05/2014 22h	natural drought	C3	0.00124183	22.4022	295.552	0.0787716
11/05/2014 23h	natural drought	C3	0.00120093	21.959	295.109	0.115421
12/05/2014 00h	natural drought	C3	0.000506895	21.5081	294.658	0.144929
12/05/2014 01h	natural drought	C3	0.000576298	21.2261	294.376	0.14944
12/05/2014 02h	natural drought	C3	0.000581256	21.1539	294.304	0.156996
12/05/2014 03h	natural drought	C3	0.0005354	20.995	294.145	0.191073
12/05/2014 04h	natural drought	C3	0.000546553	20.8498	294	0.20949
12/05/2014 05h	natural drought	C3	0.00107451	20.8068	293.957	0.228163
12/05/2014 06h	natural drought	C3	6.05503	20.495	293.645	0.271548
12/05/2014 07h	natural drought	C3	83.0046	20.6259	293.776	1.45847
12/05/2014 08h	natural drought	C3	540.153	24.6913	297.841	0.742059
12/05/2014 09h	natural drought	C3	1066.53	27.1683	300.318	0.853986
12/05/2014 10h	natural drought	C3	623.052	26.0099	299.16	0.794722
12/05/2014 11h	natural drought	C3	1039.4	25.8337	298.984	0.772688
12/05/2014 12h	natural drought	C3	1271.92	26.7602	299.91	0.685217
12/05/2014 13h	natural drought	C3	1528.05	27.2701	300.42	0.776261
12/05/2014 14h	natural drought	C3	1296.55	27.6894	300.839	0.692315
12/05/2014 15h	natural drought	C3	1197.77	26.6286	299.779	0.591544
12/05/2014 16h	natural drought	C3	719.045	24.9384	298.088	0.433212
13/05/2014 21h	natural drought	C4	0.146195	19.0509	292.201	0.0296024
13/05/2014 22h	natural drought	C4	0.00124679	18.8006	291.951	0.0260759
13/05/2014 23h	natural drought	C4	0.00261875	18.6969	291.847	0.0196132
14/05/2014 00h	natural drought	C4	0.00247994	18.3504	291.5	0.0256185
14/05/2014 01h	natural drought	C4	0.00171154	17.8185	290.969	0.0315855
14/05/2014 02h	natural drought	C4	0.00200156	18.1334	291.283	0.0311711
14/05/2014 03h	natural drought	C4	0.00161983	18.0721	291.222	0.0319199
14/05/2014 04h	natural drought	C4	0.0015839	18.1438	291.294	0.0415037
14/05/2014 05h	natural drought	C4	0.00767281	17.7725	290.922	0.0371965
14/05/2014 06h	natural drought	C4	25.0549	18.4876	291.638	0.0551605
14/05/2014 07h	natural drought	C4	415.187	20.3607	293.511	0.738001
14/05/2014 08h	natural drought	C4	837.637	22.4225	295.573	0.95582
14/05/2014 09h	natural drought	C4	819.089	23.8532	297.003	0.676312
14/05/2014 10h	natural drought	C4	1520.56	24.4471	297.597	0.452687
14/05/2014 11h	natural drought	C4	1741.6	25.2146	298.365	1.0058
14/05/2014 12h	natural drought	C4	1864.46	26.1035	299.253	0.965543
14/05/2014 13h	natural drought	C4	1887.5	25.6408	298.791	1.15195
14/05/2014 14h	natural drought	C4	1814.39	25.9459	299.096	1.20818
14/05/2014 15h	natural drought	C4	1647.61	26.058	299.208	1.10487
14/05/2014 16h	natural drought	C4	1386.24	26.4832	299.633	0.97185
14/05/2014 17h	natural drought	C4	145.96	25.0099	298.16	0.618117
14/05/2014 18h	natural drought	C4	695.787	24.9911	298.141	0.623502
15/05/2014 21h	natural drought	C5	0.293926	20.0924	293.242	0.0361298
15/05/2014 22h	natural drought	C5	0.00320373	19.4445	292.594	0.0234382
15/05/2014 23h	natural drought	C5	0.00252469	19.0412	292.191	0.0294948
16/05/2014 00h	natural drought	C5	0.00212736	18.9035	292.054	0.0352427
16/05/2014 01h	natural drought	C5	0.0031777	18.5835	291.734	0.0434165
16/05/2014 02h	natural drought	C5	0.00287157	18.3404	291.49	0.0481131
16/05/2014 03h	natural drought	C5	0.00267205	18.189	291.339	0.0548437
16/05/2014 04h	natural drought	C5	0.00170411	17.9337	291.084	0.0681288
16/05/2014 05h	natural drought	C5	0.00515819	17.8614	291.011	0.0754668
16/05/2014 06h	natural drought	C5	17.5472	17.6235	290.773	0.0995002
16/05/2014 07h	natural drought	C5	163.628	18.3512	291.501	0.67435
16/05/2014 08h	natural drought	C5	735.62	21.0637	294.214	0.667136
16/05/2014 09h	natural drought	C5	1153.72	22.9052	296.055	0.509463
16/05/2014 10h	natural drought	C5	1531.35	23.8077	296.958	0.523073
16/05/2014 11h	natural drought	C5	1790.47	24.5369	297.687	0.703265
16/05/2014 12h	natural drought	C5	1950.85	25.2351	298.385	0.884545
16/05/2014 13h	natural drought	C5	2031.28	26.755	299.905	1.02691
16/05/2014 14h	natural drought	C5	1249.23	26.0836	299.234	0.767273
16/05/2014 15h	natural drought	C5	1822.53	26.6421	299.792	0.623427
16/05/2014 16h	natural drought	C5	600.377	24.8551	298.005	0.529206
16/05/2014 17h	natural drought	C5	334.3	23.5133	296.663	0.259688
16/05/2014 18h	natural drought	C5	198.047	22.8557	296.006	0.190334
16/05/2014 19h	natural drought	C5	186.545	21.696	294.846	0.198194
16/05/2014 20h	natural drought	C5	54.294	20.903	294.053	0.091045
13/05/2014 21h	amplified drought	S1	18.1734	19.6037	292.754	0.180405
13/05/2014 22h	amplified drought	S1	0.00597783	18.7341	291.884	0.100714
13/05/2014 23h	amplified drought	S1	0.00612478	18.7199	291.87	0.0667287
14/05/2014 00h	amplified drought	S1	0.00533129	18.338	291.488	0.0662057
14/05/2014 01h	amplified drought	S1	0.00382083	18.1348	291.285	0.0338033
14/05/2014 02h	amplified drought	S1	0.00484689	18.0769	291.227	0.0565711
14/05/2014 03h	amplified drought	S1	0.00629457	18.0828	291.233	0.0602083
14/05/2014 04h	amplified drought	S1	0.00481663	18.4043	291.554	0.0617676
14/05/2014 05h	amplified drought	S1	0.00260997	17.9523	291.102	0.0420493
14/05/2014 06h	amplified drought	S1	0.782193	18.0018	291.152	0.0888008
14/05/2014 07h	amplified drought	S1	61.8257	19.2968	292.447	0.125294
14/05/2014 08h	amplified drought	S1	126.839	20.7329	293.883	0.511093
14/05/2014 09h	amplified drought	S1	126.451	22.2416	295.392	0.347746
14/05/2014 10h	amplified drought	S1	140.886	23.049	296.199	0.343727
14/05/2014 11h	amplified drought	S1	1504.18	23.553	296.703	0.373335
14/05/2014 12h	amplified drought	S1	761.491	22.7978	295.948	0.215249
14/05/2014 13h	amplified drought	S1	608.01	24.3081	297.458	0.402057
14/05/2014 14h	amplified drought	S1	1797.09	23.7574	296.907	0.303324
14/05/2014 15h	amplified drought	S1	1722.97	24.7065	297.857	0.376591
14/05/2014 16h	amplified drought	S1	1548.15	24.8995	298.05	0.451436
14/05/2014 17h	amplified drought	S1	1284.7	24.0153	297.165	0.551092
14/05/2014 18h	amplified drought	S1	510.905	24.6209	297.771	0.507078
11/05/2014 17h	amplified drought	S3	124.95	26.5358	299.686	1.06291
11/05/2014 18h	amplified drought	S3	101.984	26.473	299.623	1.07248
11/05/2014 19h	amplified drought	S3	88.2173	26.1391	299.289	0.848522
11/05/2014 20h	amplified drought	S3	55.6785	25.6542	298.804	0.753426
11/05/2014 21h	amplified drought	S3	3.10915	23.4911	296.641	0.190985
11/05/2014 22h	amplified drought	S3	0.00161957	22.6847	295.835	0.122316
11/05/2014 23h	amplified drought	S3	0.00207152	22.1328	295.283	0.131541
12/05/2014 00h	amplified drought	S3	0.000551394	21.8081	294.958	0.185726
12/05/2014 01h	amplified drought	S3	0.000930884	21.2631	294.413	0.207051
12/05/2014 02h	amplified drought	S3	0.00110387	21.2249	294.375	0.197247
12/05/2014 03h	amplified drought	S3	0.00103576	21.078	294.228	0.199279
12/05/2014 04h	amplified drought	S3	0.00150283	20.8415	293.992	0.2101
12/05/2014 05h	amplified drought	S3	0.00280133	20.8328	293.983	0.22774
12/05/2014 06h	amplified drought	S3	0.0632907	20.6879	293.838	0.165621
12/05/2014 07h	amplified drought	S3	26.991	20.3964	293.546	0.377103
12/05/2014 08h	amplified drought	S3	460.247	22.2979	295.448	1.32594
12/05/2014 09h	amplified drought	S3	472.853	23.4673	296.617	0.524045
12/05/2014 10h	amplified drought	S3	545.86	24.767	297.917	0.723074
12/05/2014 11h	amplified drought	S3	692.863	23.7073	296.857	0.567905
12/05/2014 12h	amplified drought	S3	652.154	24.3942	297.544	0.506614
12/05/2014 13h	amplified drought	S3	615.436	25.305	298.455	0.614383
12/05/2014 14h	amplified drought	S3	427.454	25.2411	298.391	0.600005
12/05/2014 15h	amplified drought	S3	244.06	25.1271	298.277	0.613215
12/05/2014 16h	amplified drought	S3	170.881	25.4654	298.615	0.665701
12/05/2014 19h	amplified drought	S4	152.85	22.7832	295.933	0.116138
12/05/2014 20h	amplified drought	S4	40.9111	21.4062	294.556	0.0731899
12/05/2014 21h	amplified drought	S4	0.25507	20.7736	293.924	0.0398027
12/05/2014 22h	amplified drought	S4	0.00398301	20.432	293.582	0.0346199
12/05/2014 23h	amplified drought	S4	0.0055345	20.0109	293.161	-0.0312975
13/05/2014 00h	amplified drought	S4	0.00439394	19.4626	292.613	-0.0212123
13/05/2014 01h	amplified drought	S4	0.00360568	19.0605	292.211	0.027335
13/05/2014 02h	amplified drought	S4	0.00510304	18.837	291.987	0.0560387
13/05/2014 03h	amplified drought	S4	0.00549773	18.4489	291.599	0.0517439
13/05/2014 04h	amplified drought	S4	0.00472477	18.2017	291.352	0.0678523
13/05/2014 05h	amplified drought	S4	0.00415921	18.1889	291.339	0.0784818
13/05/2014 06h	amplified drought	S4	9.81637	18.1669	291.317	0.103228
13/05/2014 07h	amplified drought	S4	108.032	19.4352	292.585	0.517235
13/05/2014 08h	amplified drought	S4	423.736	20.5493	293.699	0.26189
13/05/2014 09h	amplified drought	S4	159.735	21.2283	294.378	0.142698
13/05/2014 10h	amplified drought	S4	1146.08	23.6127	296.763	0.329255
13/05/2014 11h	amplified drought	S4	1446.25	24.7065	297.857	0.370065
13/05/2014 12h	amplified drought	S4	1669.47	24.3297	297.48	0.482585
13/05/2014 13h	amplified drought	S4	1671.75	25.0129	298.163	0.419437
13/05/2014 14h	amplified drought	S4	1697.52	24.4363	297.586	0.416579
13/05/2014 15h	amplified drought	S4	1914.67	25.2437	298.394	0.38615
13/05/2014 16h	amplified drought	S4	1793.33	25.1401	298.29	0.312859
13/05/2014 17h	amplified drought	S4	800.739	22.5477	295.698	0.167251
18/05/2014 20h	amplified drought	S5	70.3115	22.3515	295.501	0.0331047
18/05/2014 21h	amplified drought	S5	7.09532	21.5733	294.723	0.0153919
18/05/2014 22h	amplified drought	S5	0.00377574	20.5392	293.689	0.0174948
18/05/2014 23h	amplified drought	S5	0.00259264	19.8281	292.978	0.00190425
19/05/2014 00h	amplified drought	S5	0.00145015	19.585	292.735	0.0251482
19/05/2014 01h	amplified drought	S5	0.00291052	19.506	292.656	0.0209686
19/05/2014 02h	amplified drought	S5	0.00298535	19.6059	292.756	0.0249291
19/05/2014 03h	amplified drought	S5	0.00357931	19.45	292.6	0.0268988
19/05/2014 04h	amplified drought	S5	0.00480833	19.357	292.507	0.0209591
19/05/2014 05h	amplified drought	S5	0.00359662	19.1309	292.281	0.0371061
19/05/2014 06h	amplified drought	S5	1.6014	18.9743	292.124	0.0392022
19/05/2014 07h	amplified drought	S5	65.9189	19.3562	292.506	0.0322878
19/05/2014 08h	amplified drought	S5	301.48	20.8394	293.989	0.218088
19/05/2014 09h	amplified drought	S5	531.383	22.322	295.472	0.276838
19/05/2014 10h	amplified drought	S5	690.282	23.2402	296.39	0.26358
19/05/2014 11h	amplified drought	S5	1365.07	24.7016	297.852	0.569194
19/05/2014 12h	amplified drought	S5	1587.99	25.1126	298.263	0.668239
19/05/2014 13h	amplified drought	S5	1724.13	26.0299	299.18	0.354524
19/05/2014 14h	amplified drought	S5	1769.37	26.8106	299.961	0.593748
19/05/2014 15h	amplified drought	S5	1289.7	26.0123	299.162	0.34412
19/05/2014 16h	amplified drought	S5	609.884	25.0377	298.188	0.280173
19/05/2014 17h	amplified drought	S5	690.4	24.9172	298.067	0.275504
19/05/2014 18h	amplified drought	S5	506.313	23.9888	297.139	0.172827
19/05/2014 19h	amplified drought	S5	87.3436	22.883	296.033	0.105955
15/05/2014 21h	amplified drought	S6	6.6394	20.4114	293.561	0.0836165
15/05/2014 22h	amplified drought	S6	0.0134141	19.6535	292.803	0.0586679
15/05/2014 23h	amplified drought	S6	0.00739899	19.3196	292.47	0.0510946
16/05/2014 00h	amplified drought	S6	0.00436252	19.1599	292.31	0.0524485
16/05/2014 01h	amplified drought	S6	0.004549	18.7845	291.934	0.0602212
16/05/2014 02h	amplified drought	S6	0.00595505	18.5441	291.694	0.0612652
16/05/2014 03h	amplified drought	S6	0.0075882	18.3295	291.479	0.0267202
16/05/2014 04h	amplified drought	S6	0.00764175	18.1799	291.33	0.0680295
16/05/2014 05h	amplified drought	S6	0.00661244	17.9877	291.138	0.0695051
16/05/2014 06h	amplified drought	S6	1.00029	17.8937	291.044	0.0757041
16/05/2014 07h	amplified drought	S6	82.9825	18.5675	291.717	0.17824
16/05/2014 08h	amplified drought	S6	89.7516	19.8807	293.031	0.31797
16/05/2014 09h	amplified drought	S6	213.843	21.656	294.806	0.365658
16/05/2014 10h	amplified drought	S6	171.394	22.941	296.091	0.43094
16/05/2014 11h	amplified drought	S6	1761.76	24.2106	297.361	0.468954
16/05/2014 12h	amplified drought	S6	1853.71	24.8318	297.982	0.576932
16/05/2014 14h	amplified drought	S6	1444.83	24.9565	298.107	0.537161
16/05/2014 15h	amplified drought	S6	1141.95	24.5388	297.689	0.454378
16/05/2014 16h	amplified drought	S6	659.31	24.2176	297.368	0.424543
16/05/2014 17h	amplified drought	S6	319.925	23.7399	296.89	0.275165
16/05/2014 18h	amplified drought	S6	112.302	22.9481	296.098	0.320094
16/05/2014 19h	amplified drought	S6	121.505	21.9461	295.096	0.163278
16/05/2014 20h	amplified drought	S6	116.751	21.2036	294.354	0.125859

## Sheet: methanol summer
date	treatment	trees code	PAR	TEMP (°C)	TEMP (K)	Emissions Rate methanol (µgC.g(MS)-1.h-1)
18/07/2014 21h	natural drought	C1	50.7306	25.3427	298.493	0.000274185
18/07/2014 22h	natural drought	C1	4.85124	24.4338	297.584	-0.0364965
18/07/2014 23h	natural drought	C1	0.000606047	23.6442	296.794	0.0929512
19/07/2014 00h	natural drought	C1	0.000496981	23.6437	296.794	0.0932957
19/07/2014 01h	natural drought	C1	0.000549035	23.2512	296.401	0.0606652
19/07/2014 02h	natural drought	C1	0.000544139	23.0447	296.195	0.060346
19/07/2014 03h	natural drought	C1	0.000581257	22.943	296.093	0.059258
19/07/2014 04h	natural drought	C1	0.000815492	22.7637	295.914	0.0595363
19/07/2014 05h	natural drought	C1	0.00096918	22.9457	296.096	0.0780946
19/07/2014 06h	natural drought	C1	0.611574	22.7926	295.943	0.055969
19/07/2014 07h	natural drought	C1	51.5035	23.3957	296.546	0.237041
19/07/2014 08h	natural drought	C1	370.871	24.137	297.287	0.286466
19/07/2014 09h	natural drought	C1	355.977	24.9293	298.079	0.306775
19/07/2014 10h	natural drought	C1	774.427	25.7037	298.854	0.397087
19/07/2014 11h	natural drought	C1	694.26	26.5338	299.684	0.389861
19/07/2014 12h	natural drought	C1	1328.75	27.517	300.667	0.659628
19/07/2014 13h	natural drought	C1	872.419	28.1009	301.251	0.54544
19/07/2014 14h	natural drought	C1	763.107	27.7481	300.898	0.442459
19/07/2014 15h	natural drought	C1	1068.94	27.6564	300.806	0.537808
19/07/2014 16h	natural drought	C1	1609.95	29.1126	302.263	0.692352
19/07/2014 17h	natural drought	C1	1120.63	28.2481	301.398	0.519363
19/07/2014 18h	natural drought	C1	354.601	26.8757	300.026	0.256447
19/07/2014 19h	natural drought	C1	386.22	26.4752	299.625	0.270195
15/07/2014 19h	natural drought	C2	290.237	27.2609	300.411	0.664664
15/07/2014 20h	natural drought	C2	72.8629	25.3011	298.451	0.290631
15/07/2014 21h	natural drought	C2	0.349464	24.0139	297.164	0.19183
15/07/2014 22h	natural drought	C2	0.00124803	23.5188	296.669	0.166238
15/07/2014 23h	natural drought	C2	0.000861349	23.2408	296.391	0.154959
16/07/2014 00h	natural drought	C2	0.00107949	22.7736	295.924	0.192745
16/07/2014 01h	natural drought	C2	0.00147001	22.2925	295.442	0.135335
16/07/2014 02h	natural drought	C2	0.00165825	22.0682	295.218	0.11527
16/07/2014 03h	natural drought	C2	0.00183175	22.0428	295.193	0.328786
16/07/2014 04h	natural drought	C2	0.00181441	21.8475	294.998	1.09022
16/07/2014 05h	natural drought	C2	0.530105	21.7107	294.861	1.35002
16/07/2014 06h	natural drought	C2	88.0713	22.2517	295.402	0.836717
16/07/2014 07h	natural drought	C2	416.761	25.1258	298.276	2.0344
16/07/2014 08h	natural drought	C2	800.631	26.4107	299.561	0.675076
16/07/2014 09h	natural drought	C2	1166.51	27.8603	301.01	0.923719
16/07/2014 10h	natural drought	C2	1479.95	28.5153	301.665	1.13816
16/07/2014 11h	natural drought	C2	1709.2	29.5897	302.74	1.32036
16/07/2014 12h	natural drought	C2	1860.83	30.8081	303.958	1.4652
16/07/2014 13h	natural drought	C2	1923.35	31.1159	304.266	1.61402
16/07/2014 14h	natural drought	C2	1870.08	31.5441	304.694	1.50672
16/07/2014 15h	natural drought	C2	1729.64	30.9769	304.127	1.44331
16/07/2014 16h	natural drought	C2	1482.07	30.1989	303.349	1.31352
16/07/2014 17h	natural drought	C2	1165.65	28.5463	301.696	0.92713
16/07/2014 18h	natural drought	C2	805.961	28.0769	301.227	0.754467
14/07/2014 18h	natural drought	C3	784.863	25.3803	298.53	0.31115
14/07/2014 19h	natural drought	C3	230.205	24.3588	297.509	0.206729
14/07/2014 20h	natural drought	C3	168.503	23.8583	297.008	0.166214
14/07/2014 21h	natural drought	C3	24.2952	23.0933	296.243	0.0869238
14/07/2014 22h	natural drought	C3	0.0098491	22.401	295.551	0.079308
14/07/2014 23h	natural drought	C3	0.00201767	22.0873	295.237	0.0863539
15/07/2014 00h	natural drought	C3	0.00238203	21.9027	295.053	0.0858123
15/07/2014 01h	natural drought	C3	0.00255927	21.6217	294.772	0.0826425
15/07/2014 02h	natural drought	C3	0.00201147	21.4368	294.587	0.0824796
15/07/2014 03h	natural drought	C3	0.0027805	21.1037	294.254	0.0979409
15/07/2014 04h	natural drought	C3	0.00140046	20.9222	294.072	0.346984
15/07/2014 05h	natural drought	C3	0.00252765	20.8382	293.988	0.455828
15/07/2014 06h	natural drought	C3	7.87772	20.7457	293.896	0.395819
15/07/2014 07h	natural drought	C3	130.089	21.3465	294.496	0.776825
15/07/2014 08h	natural drought	C3	477.177	22.5882	295.738	0.669606
15/07/2014 09h	natural drought	C3	775.622	23.8825	297.032	1.12106
15/07/2014 10h	natural drought	C3	1036.68	24.9495	298.099	0.419166
15/07/2014 11h	natural drought	C3	1634.17	27.0867	300.237	0.819914
15/07/2014 12h	natural drought	C3	1792.37	27.7228	300.873	0.797743
15/07/2014 13h	natural drought	C3	1777.95	27.7167	300.867	0.799055
15/07/2014 14h	natural drought	C3	1865.62	29.0686	302.219	0.900416
15/07/2014 15h	natural drought	C3	1790.4	29.2034	302.353	0.966209
15/07/2014 16h	natural drought	C3	1178.05	28.452	301.602	0.726525
15/07/2014 17h	natural drought	C3	587.013	28.2055	301.356	0.515343
16/07/2014 22h	natural drought	C4	0.18993	23.4945	296.644	0.0104134
16/07/2014 23h	natural drought	C4	0.000638269	23.2782	296.428	0.0318965
17/07/2014 00h	natural drought	C4	0.000369327	22.7181	295.868	0.0577901
17/07/2014 01h	natural drought	C4	0.000416486	22.7514	295.901	0.0593407
17/07/2014 02h	natural drought	C4	0.000603567	22.3216	295.472	-0.00218411
17/07/2014 03h	natural drought	C4	0.0011303	21.8123	294.962	0.0323896
17/07/2014 04h	natural drought	C4	0.00111171	21.8881	295.038	0.0810747
17/07/2014 05h	natural drought	C4	0.00128272	22.0096	295.16	0.166979
17/07/2014 06h	natural drought	C4	0.470487	21.5642	294.714	0.055507
17/07/2014 07h	natural drought	C4	48.5345	21.5441	294.694	0.364729
17/07/2014 08h	natural drought	C4	99.1863	22.9493	296.099	0.294843
17/07/2014 09h	natural drought	C4	707.982	24.941	298.091	0.420762
17/07/2014 10h	natural drought	C4	563.22	25.8725	299.022	0.415813
17/07/2014 11h	natural drought	C4	144.669	26.9155	300.065	0.672217
17/07/2014 12h	natural drought	C4	1703.97	29.1153	302.265	1.00445
17/07/2014 13h	natural drought	C4	1858.93	29.8663	303.016	0.84875
17/07/2014 14h	natural drought	C4	1909.15	30.1382	303.288	0.849762
17/07/2014 15h	natural drought	C4	1884.12	29.8261	302.976	0.886863
17/07/2014 16h	natural drought	C4	1750.72	29.6498	302.8	0.835762
17/07/2014 17h	natural drought	C4	892.679	28.5962	301.746	0.563414
17/07/2014 18h	natural drought	C4	1155.03	29.2343	302.384	0.633449
17/07/2014 19h	natural drought	C4	735.133	28.5197	301.67	0.452838
17/07/2014 21h	natural drought	C5	41.0157	25.5991	298.749	0.0996639
17/07/2014 22h	natural drought	C5	0.0892037	24.4787	297.629	0.0920764
17/07/2014 23h	natural drought	C5	0.00116872	23.9899	297.14	0.112252
18/07/2014 00h	natural drought	C5	0.000927033	23.4014	296.551	0.0925607
18/07/2014 01h	natural drought	C5	0.000789473	23.2761	296.426	0.0884384
18/07/2014 02h	natural drought	C5	0.000679193	22.8899	296.04	0.0715546
18/07/2014 03h	natural drought	C5	0.000845245	22.6437	295.794	0.112659
18/07/2014 04h	natural drought	C5	0.000767159	22.5667	295.717	0.0759489
18/07/2014 05h	natural drought	C5	0.00134223	22.5623	295.712	0.0903937
18/07/2014 06h	natural drought	C5	0.646544	22.4961	295.646	0.10754
18/07/2014 07h	natural drought	C5	90.7809	22.6913	295.841	0.215607
18/07/2014 08h	natural drought	C5	436.22	24.6028	297.753	0.278913
18/07/2014 09h	natural drought	C5	846.66	26.2485	299.398	0.560639
18/07/2014 10h	natural drought	C5	1213.55	27.8686	301.019	0.70864
18/07/2014 11h	natural drought	C5	1517.56	28.4459	301.596	0.70864
18/07/2014 12h	natural drought	C5	1737.59	29.5733	302.723	0.956837
18/07/2014 13h	natural drought	C5	1875.47	30.1661	303.316	1.23274
18/07/2014 14h	natural drought	C5	1872.59	30.3236	303.474	1.19381
18/07/2014 15h	natural drought	C5	1757.01	30.7451	303.895	0.976901
18/07/2014 16h	natural drought	C5	1558.72	30.8241	303.974	0.637937
18/07/2014 17h	natural drought	C5	1254.81	28.9029	302.053	0.530399
18/07/2014 18h	natural drought	C5	828.342	28.0477	301.198	0.441016
18/07/2014 19h	natural drought	C5	162.38	28.2439	301.394	0.527994
16/07/2014 21h	amplified drought	S1	5.10434	24.1844	297.334	0.12234
16/07/2014 22h	amplified drought	S1	0.00759303	23.4237	296.574	0.0566296
16/07/2014 23h	amplified drought	S1	0.00331919	23.0707	296.221	0.0766142
17/07/2014 00h	amplified drought	S1	0.00446521	22.7842	295.934	0.032614
17/07/2014 01h	amplified drought	S1	0.00446521	22.7842	295.934	0.0632065
17/07/2014 02h	amplified drought	S1	0.0014185	22.1639	295.314	0.0791507
17/07/2014 03h	amplified drought	S1	0.00320023	22.1201	295.27	0.0800014
17/07/2014 04h	amplified drought	S1	0.00133957	22.1744	295.324	0.0769061
17/07/2014 05h	amplified drought	S1	0.0113339	21.9945	295.145	0.0951084
17/07/2014 06h	amplified drought	S1	22.8381	21.7319	294.882	0.0393988
17/07/2014 07h	amplified drought	S1	152.101	22.9593	296.109	0.128511
17/07/2014 08h	amplified drought	S1	648.005	25.1908	298.341	0.108343
17/07/2014 09h	amplified drought	S1	151.331	25.6313	298.781	0.0912407
17/07/2014 10h	amplified drought	S1	1355.85	27.0447	300.195	0.380481
17/07/2014 11h	amplified drought	S1	1606.87	27.7334	300.883	0.321006
17/07/2014 12h	amplified drought	S1	1771.01	29.4008	302.551	0.502018
17/07/2014 13h	amplified drought	S1	1773.85	29.5815	302.732	0.525994
17/07/2014 14h	amplified drought	S1	1762.33	29.0395	302.19	0.496731
17/07/2014 15h	amplified drought	S1	1717.95	29.6655	302.815	0.569637
17/07/2014 16h	amplified drought	S1	1414.69	30.5719	303.722	0.390107
17/07/2014 17h	amplified drought	S1	1229.43	30.5985	303.748	0.529573
17/07/2014 18h	amplified drought	S1	764.585	29.9151	303.065	0.490532
14/07/2014 17h	amplified drought	S3	384.93	28.0592	301.209	0.695048
14/07/2014 18h	amplified drought	S3	134.555	27.7103	300.86	0.479058
14/07/2014 19h	amplified drought	S3	80.0103	24.7439	297.894	0.212761
14/07/2014 20h	amplified drought	S3	41.0832	24.3989	297.549	0.153012
14/07/2014 21h	amplified drought	S3	0.946492	23.1452	296.295	0.090819
14/07/2014 22h	amplified drought	S3	0.00437489	22.5782	295.728	0.0810296
14/07/2014 23h	amplified drought	S3	0.00180376	22.38	295.53	0.0731587
15/07/2014 00h	amplified drought	S3	0.00475432	22.1354	295.285	0.0682751
15/07/2014 01h	amplified drought	S3	0.00495783	21.766	294.916	0.0629221
15/07/2014 02h	amplified drought	S3	0.0017796	21.4701	294.62	0.141976
15/07/2014 03h	amplified drought	S3	0.000466707	21.2452	294.395	0.361957
15/07/2014 04h	amplified drought	S3	0.0046504	21.1426	294.293	0.302986
15/07/2014 05h	amplified drought	S3	0.0200795	21.0258	294.176	0.420855
15/07/2014 06h	amplified drought	S3	15.9175	21.0273	294.177	0.452721
15/07/2014 07h	amplified drought	S3	77.7159	21.4669	294.617	0.815476
15/07/2014 08h	amplified drought	S3	113.013	22.6108	295.761	0.490482
15/07/2014 09h	amplified drought	S3	164.046	23.4208	296.571	0.338706
15/07/2014 10h	amplified drought	S3	549.037	25.4925	298.642	0.31776
15/07/2014 11h	amplified drought	S3	347.935	25.818	298.968	0.365529
15/07/2014 12h	amplified drought	S3	1322.34	27.4723	300.622	0.515296
15/07/2014 13h	amplified drought	S3	1659.33	27.3464	300.496	0.520042
15/07/2014 14h	amplified drought	S3	1219.18	28.9446	302.095	0.669708
15/07/2014 15h	amplified drought	S3	1536.54	28.2425	301.392	0.516744
15/07/2014 16h	amplified drought	S3	782.156	28.3668	301.517	0.4327
16/07/2014 09h	amplified drought	S4	992.32	26.534	299.684	0.292426
16/07/2014 10h	amplified drought	S4	285.168	25.8486	298.999	0.21006
16/07/2014 11h	amplified drought	S4	157.82	26.3701	299.52	0.273573
16/07/2014 12h	amplified drought	S4	1136.51	29.6102	302.76	0.501143
16/07/2014 13h	amplified drought	S4	561.959	29.8966	303.047	0.615009
16/07/2014 14h	amplified drought	S4	1789.97	30.9226	304.073	0.818947
16/07/2014 15h	amplified drought	S4	1689.91	31.6481	304.798	0.824603
16/07/2014 16h	amplified drought	S4	1488.34	31.1851	304.335	0.764905
16/07/2014 17h	amplified drought	S4	1074.29	28.5398	301.69	0.463166
16/07/2014 18h	amplified drought	S4	844.566	29.3615	302.512	0.498559
16/07/2014 19h	amplified drought	S4	357.927	28.3077	301.458	0.332247
18/07/2014 20h	amplified drought	S5	33.7129	26.1643	299.314	0.0938619
18/07/2014 21h	amplified drought	S5	1.85088	25.0201	298.17	0.152826
18/07/2014 22h	amplified drought	S5	0.00325973	24.1883	297.338	0.0796574
18/07/2014 23h	amplified drought	S5	0.0061162	23.9073	297.057	0.0228914
19/07/2014 00h	amplified drought	S5	0.00231151	23.7893	296.939	0.0296324
19/07/2014 01h	amplified drought	S5	0.00423733	23.3954	296.545	0.0482554
19/07/2014 02h	amplified drought	S5	0.00834625	23.3437	296.494	0.0559974
19/07/2014 03h	amplified drought	S5	0.0100295	23.1526	296.303	0.0549187
19/07/2014 04h	amplified drought	S5	0.0111311	23.3399	296.49	0.0297634
19/07/2014 05h	amplified drought	S5	0.6593	23.2472	296.397	0.0507096
19/07/2014 06h	amplified drought	S5	13.6969	23.5469	296.697	0.021184
19/07/2014 07h	amplified drought	S5	131.062	23.8708	297.021	0.0682389
19/07/2014 08h	amplified drought	S5	318.309	25.6626	298.813	0.119203
19/07/2014 09h	amplified drought	S5	700.248	26.1611	299.311	0.317371
19/07/2014 10h	amplified drought	S5	679.664	26.7661	299.916	0.238962
19/07/2014 11h	amplified drought	S5	603.096	27.0822	300.232	0.370661
19/07/2014 12h	amplified drought	S5	728.372	28.2086	301.359	0.608127
19/07/2014 13h	amplified drought	S5	427.196	27.7456	300.896	0.580101
19/07/2014 14h	amplified drought	S5	479.386	27.3827	300.533	0.355129
19/07/2014 15h	amplified drought	S5	1136.78	29.3925	302.542	0.578136
19/07/2014 16h	amplified drought	S5	601.119	29.6149	302.765	0.473137
19/07/2014 17h	amplified drought	S5	357.733	27.9469	301.097	0.280404
19/07/2014 18h	amplified drought	S5	248.632	26.8017	299.952	0.181645
17/07/2014 20h	amplified drought	S6	73.4635	26.4111	299.561	0.21254
17/07/2014 21h	amplified drought	S6	3.39551	24.9922	298.142	0.0377958
17/07/2014 22h	amplified drought	S6	0.0155429	24.2253	297.375	0.088574
17/07/2014 23h	amplified drought	S6	0.0054307	23.6868	296.837	0.0576863
18/07/2014 00h	amplified drought	S6	0.00673777	23.4698	296.62	0.0627287
18/07/2014 01h	amplified drought	S6	0.00517555	23.173	296.323	0.0829626
18/07/2014 02h	amplified drought	S6	0.0154012	22.8097	295.96	0.0937793
18/07/2014 03h	amplified drought	S6	0.0146305	22.679	295.829	0.134838
18/07/2014 04h	amplified drought	S6	0.0133028	22.5685	295.718	0.0517918
18/07/2014 05h	amplified drought	S6	0.00894783	22.5039	295.654	0.0877138
18/07/2014 06h	amplified drought	S6	21.6028	22.5285	295.679	0.104844
18/07/2014 07h	amplified drought	S6	142.2	24.7504	297.9	0.204228
18/07/2014 08h	amplified drought	S6	247.791	25.8919	299.042	0.302541
18/07/2014 09h	amplified drought	S6	437.807	27.4847	300.635	0.341172
18/07/2014 10h	amplified drought	S6	1395.97	28.0313	301.181	0.398167
18/07/2014 11h	amplified drought	S6	1605.3	28.9002	302.05	0.477317
18/07/2014 12h	amplified drought	S6	1709.18	29.5982	302.748	0.679504
18/07/2014 13h	amplified drought	S6	1728.18	30.2944	303.444	0.642368
18/07/2014 14h	amplified drought	S6	1848.82	30.751	303.901	0.707615
18/07/2014 15h	amplified drought	S6	305.109	30.3271	303.477	0.727931
18/07/2014 16h	amplified drought	S6	1250.59	29.1152	302.265	0.416995
18/07/2014 17h	amplified drought	S6	986.92	30.1312	303.281	0.5167
18/07/2014 18h	amplified drought	S6	668.793	29.9903	303.14	0.380347
18/07/2014 19h	amplified drought	S6	215.766	28.0747	301.225	-0.0610713

## Sheet: methanol autumn
date	treatment	trees code	PAR	TEMP (°C)	TEMP (K)	Emissions Rate methanol (µgC.g(MS)-1.h-1)
26/10/2013 19h	natural drought	C1	0.0459538	22.3075	295.458	0.0225717
26/10/2013 20h	natural drought	C1	0.00513676	21.8153	294.965	0.0492124
26/10/2013 21h	natural drought	C1	0.00339211	21.4997	294.65	0.0681838
26/10/2013 22h	natural drought	C1	0.00744189	21.363	294.513	0.0318112
26/10/2013 23h	natural drought	C1	0.00704861	21.2819	294.432	0.0538618
27/10/2013 00h	natural drought	C1	0.0031554	21.05	294.2	0.0297618
27/10/2013 01h	natural drought	C1	0.00784299	20.9689	294.119	0.0293652
27/10/2013 02h	natural drought	C1	0.00912455	20.8649	294.015	0.0270657
27/10/2013 03h	natural drought	C1	0.00693572	20.8796	294.03	0.036636
27/10/2013 04h	natural drought	C1	0.0112585	21.0113	294.161	0.0247838
27/10/2013 05h	natural drought	C1	0.0107643	21.2223	294.372	0.0382075
27/10/2013 06h	natural drought	C1	0.00872731	21.2334	294.383	0.0235957
27/10/2013 07h	natural drought	C1	0.00873984	21.1651	294.315	0.0316806
27/10/2013 08h	natural drought	C1	13.4458	21.0856	294.236	0.0218078
27/10/2013 09h	natural drought	C1	248.222	22.3484	295.498	0.0719992
27/10/2013 10h	natural drought	C1	138.832	23.2606	296.411	0.143904
27/10/2013 11h	natural drought	C1	191.777	23.6609	296.811	0.0933082
27/10/2013 12h	natural drought	C1	439.234	23.5896	296.74	0.0677405
27/10/2013 13h	natural drought	C1	850.223	24.8491	297.999	0.16652
27/10/2013 14h	natural drought	C1	878.376	25.4939	298.644	0.137666
27/10/2013 15h	natural drought	C1	1058.53	26.3407	299.491	0.116707
27/10/2013 16h	natural drought	C1	385.053	25.2028	298.353	0.0945253
27/10/2013 17h	natural drought	C1	270.138	25.1451	298.295	0.0682077
27/10/2013 18h	natural drought	C1	52.7722	23.3831	296.533	0.0463346
18/10/2013 20h	natural drought	C2	0.00776519	21.3177	294.468	0.0414714
18/10/2013 21h	natural drought	C2	0.00641513	20.9045	294.055	0.0306702
18/10/2013 22h	natural drought	C2	0.00604657	21.1145	294.264	0.028728
18/10/2013 23h	natural drought	C2	0.00500963	21.1181	294.268	0.0820604
19/10/2013 00h	natural drought	C2	0.0071727	21.1912	294.341	0.200016
19/10/2013 01h	natural drought	C2	0.00899787	21.0764	294.226	0.18164
19/10/2013 02h	natural drought	C2	0.00563119	20.9176	294.068	0.0549188
19/10/2013 03h	natural drought	C2	0.0112295	20.9832	294.133	0.0519424
19/10/2013 04h	natural drought	C2	0.00516012	20.8831	294.033	0.065743
19/10/2013 05h	natural drought	C2	0.0057474	20.6621	293.812	0.0381186
19/10/2013 06h	natural drought	C2	0.00713241	20.4356	293.586	0.0293875
19/10/2013 07h	natural drought	C2	0.0299808	20.3693	293.519	0.0365956
19/10/2013 08h	natural drought	C2	48.6386	20.7672	293.917	0.0544457
19/10/2013 09h	natural drought	C2	231.125	22.5376	295.688	0.148905
19/10/2013 10h	natural drought	C2	617.838	23.7388	296.889	0.252887
19/10/2013 11h	natural drought	C2	819.845	24.2588	297.409	0.215917
19/10/2013 12h	natural drought	C2	1236.89	25.2212	298.371	0.330097
19/10/2013 13h	natural drought	C2	923.578	25.4438	298.594	0.280644
19/10/2013 14h	natural drought	C2	1006.93	25.2313	298.381	0.292374
19/10/2013 15h	natural drought	C2	341.708	25.0296	298.18	0.226718
19/10/2013 16h	natural drought	C2	548.282	24.6682	297.818	0.17349
19/10/2013 17h	natural drought	C2	183.087	23.5131	296.663	0.0855504
19/10/2013 18h	natural drought	C2	81.0206	22.9055	296.056	0.0445776
19/10/2013 19h	natural drought	C2	0.171913	21.3395	294.49	0.0510379
16/10/2013 01h	natural drought	C3	0.00778381	20.0394	293.189	0.154656
16/10/2013 02h	natural drought	C3	0.0117082	20.3262	293.476	0.11134
16/10/2013 03h	natural drought	C3	0.0147983	20.4023	293.552	0.127907
16/10/2013 04h	natural drought	C3	0.0160551	20.3245	293.475	0.115343
16/10/2013 05h	natural drought	C3	0.0205077	20.187	293.337	0.122338
16/10/2013 06h	natural drought	C3	0.00612985	20.3009	293.451	0.161419
16/10/2013 07h	natural drought	C3	0.0037749	20.2166	293.367	0.115943
16/10/2013 08h	natural drought	C3	4.34017	20.3663	293.516	0.118121
16/10/2013 09h	natural drought	C3	198.331	21.1501	294.3	0.180915
16/10/2013 10h	natural drought	C3	436.816	22.525	295.675	0.122727
16/10/2013 11h	natural drought	C3	656.967	23.3899	296.54	0.139884
16/10/2013 12h	natural drought	C3	919.178	24.2205	297.37	0.193075
16/10/2013 13h	natural drought	C3	947.797	23.8048	296.955	0.150522
16/10/2013 14h	natural drought	C3	973.234	24.063	297.213	0.0787407
16/10/2013 15h	natural drought	C3	190.735	23.5335	296.683	0.110806
16/10/2013 16h	natural drought	C3	744.942	23.9472	297.097	0.0982894
16/10/2013 17h	natural drought	C3	177.997	22.7603	295.91	0.062149
16/10/2013 18h	natural drought	C3	40.9235	21.2231	294.373	0.0387932
16/10/2013 19h	natural drought	C3	9.03071	20.906	294.056	0.0349777
16/10/2013 20h	natural drought	C3	0.00343126	20.6258	293.776	0.0117188
16/10/2013 21h	natural drought	C3	0.00245336	20.513	293.663	0.0362933
16/10/2013 22h	natural drought	C3	0.0043577	20.1745	293.325	0.0014027
16/10/2013 23h	natural drought	C3	0.0125584	20.1488	293.299	0.145709
15/10/2013 00h	natural drought	C3	0.00608258	20.0167	293.167	0.120827
20/10/2013 21h	natural drought	C4	0.0259938	21.0124	294.162	0.0236413
20/10/2013 22h	natural drought	C4	0.0211484	20.7849	293.935	0.0333408
20/10/2013 23h	natural drought	C4	0.067014	20.7731	293.923	0.0206537
21/10/2013 00h	natural drought	C4	0.00485588	21.0261	294.176	0.0166634
21/10/2013 01h	natural drought	C4	0.0378152	20.9055	294.055	0.010531
21/10/2013 02h	natural drought	C4	0.0187045	20.8885	294.039	0.0305908
21/10/2013 03h	natural drought	C4	0.0434124	20.7664	293.916	0.0132516
21/10/2013 04h	natural drought	C4	0.186227	20.7867	293.937	0.0238635
21/10/2013 05h	natural drought	C4	0.15785	20.6128	293.763	0.0217269
21/10/2013 06h	natural drought	C4	0.171815	20.8444	293.994	0.009132
21/10/2013 07h	natural drought	C4	0.0619379	20.8752	294.025	0.0186023
21/10/2013 08h	natural drought	C4	1.34823	20.5461	293.696	0.0467043
21/10/2013 09h	natural drought	C4	66.5843	21.0515	294.201	0.0549448
21/10/2013 10h	natural drought	C4	120.184	21.6466	294.797	0.0696231
21/10/2013 11h	natural drought	C4	498.154	23.188	296.338	0.123191
21/10/2013 12h	natural drought	C4	261.859	23.3206	296.471	0.103798
21/10/2013 13h	natural drought	C4	438.466	23.8916	297.042	0.147221
21/10/2013 14h	natural drought	C4	851.675	25.2277	298.378	0.177756
21/10/2013 15h	natural drought	C4	461.249	25.3413	298.491	0.120855
21/10/2013 16h	natural drought	C4	163.083	24.0333	297.183	0.0882519
21/10/2013 17h	natural drought	C4	130.22	23.5987	296.749	0.0743987
21/10/2013 18h	natural drought	C4	39.956	22.4732	295.623	0.0578072
21/10/2013 19h	natural drought	C4	0.682787	21.6943	294.844	0.0209661
21/10/2013 20h	natural drought	C4	0.129465	21.1618	294.312	0.0265248
23/10/2013 19h	natural drought	C5	0.0112044	22.3839	295.534	0.0383673
23/10/2013 20h	natural drought	C5	0.00266057	21.8761	295.026	0.0423286
23/10/2013 21h	natural drought	C5	0.00766627	21.4741	294.624	0.0394825
23/10/2013 22h	natural drought	C5	0.00409372	21.3003	294.45	0.0436344
23/10/2013 23h	natural drought	C5	0.0194091	21.1806	294.331	0.292057
24/10/2013 00h	natural drought	C5	0.00958644	21.0193	294.169	0.371524
24/10/2013 01h	natural drought	C5	0.0117415	20.9373	294.087	0.310557
24/10/2013 02h	natural drought	C5	0.0164027	20.9068	294.057	0.268093
24/10/2013 03h	natural drought	C5	0.0157257	20.8795	294.029	0.248653
24/10/2013 04h	natural drought	C5	0.00975805	21.1323	294.282	0.175724
24/10/2013 05h	natural drought	C5	0.0182055	21.3482	294.498	0.0524733
24/10/2013 06h	natural drought	C5	0.0137541	21.4406	294.591	0.0679642
24/10/2013 07h	natural drought	C5	0.0107943	21.6056	294.756	0.0597281
24/10/2013 08h	natural drought	C5	17.8341	20.9793	294.129	0.0494863
24/10/2013 09h	natural drought	C5	95.7984	21.4562	294.606	0.132698
24/10/2013 10h	natural drought	C5	167.394	22.1345	295.284	0.295613
24/10/2013 11h	natural drought	C5	198.331	22.4886	295.639	0.26901
24/10/2013 12h	natural drought	C5	360.313	23.4566	296.607	0.229863
24/10/2013 13h	natural drought	C5	646.177	24.0563	297.206	0.184464
24/10/2013 14h	natural drought	C5	336.601	24.0297	297.18	0.140615
24/10/2013 15h	natural drought	C5	336.159	24.6895	297.839	0.18052
24/10/2013 16h	natural drought	C5	164.635	23.8672	297.017	0.0957307
24/10/2013 17h	natural drought	C5	187.046	23.8589	297.009	0.086809
24/10/2013 18h	natural drought	C5	13.4974	23.3325	296.482	0.0673051
20/10/2013 09h	amplified drought	S1	86.7415	21.4948	294.645	0.101859
20/10/2013 10h	amplified drought	S1	329.654	22.5858	295.736	0.109928
20/10/2013 11h	amplified drought	S1	425.259	23.5462	296.696	0.156146
20/10/2013 12h	amplified drought	S1	632.531	24.3306	297.481	0.219397
20/10/2013 13h	amplified drought	S1	720.336	25.9735	299.124	0.298396
20/10/2013 14h	amplified drought	S1	554.956	25.2846	298.435	0.255367
20/10/2013 15h	amplified drought	S1	181.663	24.0009	297.151	0.160285
20/10/2013 16h	amplified drought	S1	184.476	23.5981	296.748	0.137166
20/10/2013 17h	amplified drought	S1	87.5907	22.7856	295.936	0.0799068
20/10/2013 18h	amplified drought	S1	5.28489	21.9607	295.111	0.0483454
20/10/2013 19h	amplified drought	S1	0.0168252	21.4744	294.624	0.0360187
20/10/2013 20h	amplified drought	S1	0.00827091	21.1725	294.322	0.0325297
20/10/2013 21h	amplified drought	S1	0.00898234	20.991	294.141	0.0303907
20/10/2013 22h	amplified drought	S1	0.00492042	20.3956	293.546	0.0354788
20/10/2013 23h	amplified drought	S1	0.00771627	21.4179	294.568	0.0300732
21/10/2013 00h	amplified drought	S1	0.00569345	21.5088	294.659	0.0338951
21/10/2013 01h	amplified drought	S1	0.0108786	21.1274	294.277	0.0355827
21/10/2013 02h	amplified drought	S1	0.00844719	21.4234	294.573	0.0281584
21/10/2013 03h	amplified drought	S1	0.00723518	21.1457	294.296	0.0399605
21/10/2013 04h	amplified drought	S1	0.00756609	20.8887	294.039	0.046107
21/10/2013 05h	amplified drought	S1	0.00204125	20.8576	294.008	0.0349326
21/10/2013 06h	amplified drought	S1	0.00473875	21.0921	294.242	0.0338371
21/10/2013 07h	amplified drought	S1	0.00625891	21.0267	294.177	0.0392736
21/10/2013 08h	amplified drought	S1	26.6267	20.8889	294.039	0.0164508
16/10/2013 00h	amplified drought	S3	0.0065037	20.2156	293.366	0.109095
16/10/2013 01h	amplified drought	S3	0.00474819	20.2952	293.445	0.0767826
16/10/2013 02h	amplified drought	S3	0.00762576	20.4426	293.593	0.082017
16/10/2013 03h	amplified drought	S3	0.010862	20.466	293.616	0.0868951
16/10/2013 04h	amplified drought	S3	0.00913649	20.3345	293.485	0.0928806
16/10/2013 05h	amplified drought	S3	0.00787998	20.3507	293.501	0.0968049
16/10/2013 06h	amplified drought	S3	0.00536298	20.4409	293.591	0.173007
16/10/2013 07h	amplified drought	S3	0.00628588	20.452	293.602	0.0747443
16/10/2013 08h	amplified drought	S3	15.7163	20.503	293.653	0.132235
16/10/2013 09h	amplified drought	S3	56.6324	21.0008	294.151	0.216836
16/10/2013 10h	amplified drought	S3	296.996	21.8139	294.964	0.22471
16/10/2013 11h	amplified drought	S3	597.413	23.1752	296.325	0.365678
16/10/2013 12h	amplified drought	S3	638.018	23.4259	296.576	0.32104
16/10/2013 13h	amplified drought	S3	678.787	23.8632	297.013	0.405459
16/10/2013 14h	amplified drought	S3	421.906	24.6794	297.829	0.388226
16/10/2013 15h	amplified drought	S3	272.964	24.3981	297.548	0.331052
16/10/2013 16h	amplified drought	S3	522.91	25.7129	298.863	0.276257
16/10/2013 17h	amplified drought	S3	63.0551	24.0752	297.225	0.137893
16/10/2013 18h	amplified drought	S3	12.7898	21.2417	294.392	0.0870629
16/10/2013 19h	amplified drought	S3	0.193234	20.9747	294.125	0.0908865
16/10/2013 20h	amplified drought	S3	0.00775914	20.7813	293.931	0.0819798
16/10/2013 21h	amplified drought	S3	0.0104417	20.5395	293.69	0.0539023
16/10/2013 22h	amplified drought	S3	0.00904663	20.2461	293.396	0.0536916
16/10/2013 23h	amplified drought	S3	0.00287238	20.2157	293.366	0.0673959
18/10/2013 21h	amplified drought	S4	0.00726202	21.3151	294.465	0.0621139
18/10/2013 22h	amplified drought	S4	0.00480429	21.2036	294.354	0.0270381
18/10/2013 23h	amplified drought	S4	0.00785356	21.3794	294.529	0.0564312
19/10/2013 00h	amplified drought	S4	0.00671882	21.3768	294.527	0.0586978
19/10/2013 01h	amplified drought	S4	0.0040652	21.4153	294.565	0.0451148
19/10/2013 02h	amplified drought	S4	0.00542593	21.2039	294.354	0.0773846
19/10/2013 03h	amplified drought	S4	0.00355658	21.0833	294.233	0.070368
19/10/2013 04h	amplified drought	S4	0.00579281	21.1205	294.27	0.0454304
19/10/2013 05h	amplified drought	S4	0.00922424	21.0445	294.195	0.0479605
19/10/2013 06h	amplified drought	S4	0.00606859	20.7632	293.913	0.0437055
19/10/2013 07h	amplified drought	S4	0.00308703	20.6101	293.76	0.0373094
19/10/2013 08h	amplified drought	S4	2.41506	20.5499	293.7	0.0385707
19/10/2013 09h	amplified drought	S4	104.498	21.6687	294.819	0.0603044
19/10/2013 10h	amplified drought	S4	340.855	22.6199	295.77	0.10607
19/10/2013 11h	amplified drought	S4	599.247	23.1652	296.315	0.159286
19/10/2013 12h	amplified drought	S4	579.066	23.4654	296.615	0.317694
19/10/2013 13h	amplified drought	S4	382.807	24.0182	297.168	0.329466
19/10/2013 14h	amplified drought	S4	613.01	24.4633	297.613	0.297334
19/10/2013 15h	amplified drought	S4	761.928	25.7938	298.944	0.336351
19/10/2013 16h	amplified drought	S4	396.896	25.9984	299.148	0.326328
19/10/2013 17h	amplified drought	S4	423.103	24.7127	297.863	0.233431
19/10/2013 18h	amplified drought	S4	95.2377	23.5533	296.703	0.159256
19/10/2013 19h	amplified drought	S4	12.6899	22.1904	295.34	0.125119
19/10/2013 20h	amplified drought	S4	0.00649623	21.3164	294.466	0.0888676
26/10/2013 20h	amplified drought	S5	0.0116298	21.8309	294.981	0.0183462
26/10/2013 21h	amplified drought	S5	0.0118287	21.4378	294.588	0.0447197
26/10/2013 22h	amplified drought	S5	0.00508113	21.2509	294.401	0.0409397
26/10/2013 23h	amplified drought	S5	0.00313209	21.2157	294.366	0.0873628
27/10/2013 00h	amplified drought	S5	0.00939107	21.1226	294.273	0.0407246
27/10/2013 01h	amplified drought	S5	0.00299051	20.9596	294.11	0.0229126
27/10/2013 02h	amplified drought	S5	0.0088475	20.8188	293.969	0.0468537
27/10/2013 03h	amplified drought	S5	0.00977434	20.8136	293.964	0.0203057
27/10/2013 04h	amplified drought	S5	0.00639835	20.9138	294.064	0.0331777
27/10/2013 05h	amplified drought	S5	0.018596	21.0196	294.17	0.0435156
27/10/2013 06h	amplified drought	S5	0.0178523	21.3033	294.453	0.0197592
27/10/2013 07h	amplified drought	S5	0.00594966	21.0735	294.224	0.0259921
27/10/2013 08h	amplified drought	S5	0.0463342	21.081	294.231	0.0255754
27/10/2013 09h	amplified drought	S5	44.9171	21.0317	294.182	0.0353206
27/10/2013 10h	amplified drought	S5	172.43	21.7337	294.884	0.0438784
27/10/2013 11h	amplified drought	S5	409.488	22.4131	295.563	0.0546941
27/10/2013 12h	amplified drought	S5	567.575	24.1693	297.319	0.0883478
27/10/2013 13h	amplified drought	S5	453.326	24.6696	297.82	0.129043
27/10/2013 14h	amplified drought	S5	564.466	24.6175	297.767	0.105057
27/10/2013 15h	amplified drought	S5	880.155	26.8859	300.036	0.216847
27/10/2013 16h	amplified drought	S5	538.829	26.6376	299.788	0.208416
27/10/2013 17h	amplified drought	S5	182.531	24.9431	298.093	0.105328
27/10/2013 18h	amplified drought	S5	111.512	24.2343	297.384	0.0675241
27/10/2013 19h	amplified drought	S5	3.20673	22.365	295.515	0.0346996
23/10/2013 20h	amplified drought	S6	0.00607828	21.9299	295.08	0.039007
23/10/2013 21h	amplified drought	S6	0.00207041	21.5763	294.726	0.027348
23/10/2013 22h	amplified drought	S6	0.00479831	21.6403	294.79	0.0289535
23/10/2013 23h	amplified drought	S6	0.00950348	21.5529	294.703	0.126569
24/10/2013 00h	amplified drought	S6	0.00228666	21.4343	294.584	0.0419015
24/10/2013 01h	amplified drought	S6	0.00367061	21.4337	294.584	0.0493832
24/10/2013 02h	amplified drought	S6	0.0115782	21.3783	294.528	0.040066
24/10/2013 03h	amplified drought	S6	0.00724714	21.3808	294.531	0.0478682
24/10/2013 04h	amplified drought	S6	0.00957811	21.403	294.553	0.0233269
24/10/2013 05h	amplified drought	S6	0.00589888	21.5995	294.749	0.047557
24/10/2013 06h	amplified drought	S6	0.00684384	21.703	294.853	0.0217969
24/10/2013 07h	amplified drought	S6	0.00761248	21.5351	294.685	0.0365298
24/10/2013 08h	amplified drought	S6	10.9306	20.9702	294.12	0.0154819
24/10/2013 09h	amplified drought	S6	128.582	21.7017	294.852	0.169879
24/10/2013 10h	amplified drought	S6	175.332	22.2175	295.367	0.117216
24/10/2013 11h	amplified drought	S6	188.113	22.6036	295.754	0.0848791
24/10/2013 12h	amplified drought	S6	348.376	23.39	296.54	0.0992476
24/10/2013 13h	amplified drought	S6	369.783	24.1279	297.278	0.121816
24/10/2013 14h	amplified drought	S6	247.301	24.5032	297.653	0.113158
24/10/2013 15h	amplified drought	S6	210.451	24.4331	297.583	0.147926
24/10/2013 16h	amplified drought	S6	169.074	24.8597	298.01	0.132531
24/10/2013 17h	amplified drought	S6	114.388	24.0299	297.18	0.0914497
24/10/2013 18h	amplified drought	S6	61.5407	23.7295	296.879	0.0646955
24/10/2013 19h	amplified drought	S6	2.09856	23.2309	296.381	0.0368169

## Sheet: MACR+MVK+ISOPOOH spring
date	treatment	trees code	PAR	TEMP (°C)	TEMP (K)	Emissions Rate MACR+MVK+ISOPOOH (µgC.g(MS)-1.h-1)
12/05/2014 20h	natural drought	C2	72.8861	22.0939	295.244	0.0177999
12/05/2014 21h	natural drought	C2	10.7855	21.2159	294.366	0.00627855
12/05/2014 22h	natural drought	C2	0.00285425	20.6017	293.752	0.00492791
12/05/2014 23h	natural drought	C2	0.00137445	20.4121	293.562	0.00427475
13/05/2014 00h	natural drought	C2	0.00165702	19.7439	292.894	0.00409329
13/05/2014 01h	natural drought	C2	0.00201519	19.1374	292.287	0.00281127
13/05/2014 02h	natural drought	C2	0.00104849	18.991	292.141	0.00253149
13/05/2014 03h	natural drought	C2	0.00130132	18.5595	291.71	0.0019736
13/05/2014 04h	natural drought	C2	0.000975496	18.286	291.436	0.00159664
13/05/2014 05h	natural drought	C2	0.00275369	18.1874	291.337	0.00287677
13/05/2014 06h	natural drought	C2	0.15613	18.1829	291.333	0.00236452
13/05/2014 07h	natural drought	C2	47.1451	18.4127	291.563	0.002465
13/05/2014 08h	natural drought	C2	111.549	19.6496	292.8	0.00755171
13/05/2014 09h	natural drought	C2	146.192	20.8553	294.005	0.0151229
13/05/2014 10h	natural drought	C2	233.505	22.0209	295.171	0.0282556
13/05/2014 11h	natural drought	C2	661.713	24.0583	297.208	0.0310217
13/05/2014 12h	natural drought	C2	1086.46	26.1197	299.27	0.0545612
13/05/2014 13h	natural drought	C2	1193.67	26.1605	299.311	0.0901965
13/05/2014 14h	natural drought	C2	1659.61	24.8671	298.017	0.0874684
13/05/2014 15h	natural drought	C2	1913.93	24.7149	297.865	0.100617
13/05/2014 16h	natural drought	C2	2003.56	25.7397	298.89	0.0804868
13/05/2014 17h	natural drought	C2	1951.54	24.2279	297.378	0.0605145
13/05/2014 18h	natural drought	C2	286.744	23.5522	296.702	0.0556682
11/05/2014 17h	natural drought	C3	367.993	25.6111	298.761	0.0436367
11/05/2014 18h	natural drought	C3	212.502	25.5295	298.679	0.0609969
11/05/2014 19h	natural drought	C3	154.645	24.8677	298.018	0.0221052
11/05/2014 20h	natural drought	C3	39.939	23.7669	296.917	0.00986837
11/05/2014 21h	natural drought	C3	0.138401	22.803	295.953	0.00544467
11/05/2014 22h	natural drought	C3	0.00124183	22.4022	295.552	0.00447569
11/05/2014 23h	natural drought	C3	0.00120093	21.959	295.109	0.00467462
12/05/2014 00h	natural drought	C3	0.000506895	21.5081	294.658	0.00429784
12/05/2014 01h	natural drought	C3	0.000576298	21.2261	294.376	0.0049888
12/05/2014 02h	natural drought	C3	0.000581256	21.1539	294.304	0.00436794
12/05/2014 03h	natural drought	C3	0.0005354	20.995	294.145	0.00479387
12/05/2014 04h	natural drought	C3	0.000546553	20.8498	294	0.00362148
12/05/2014 05h	natural drought	C3	0.00107451	20.8068	293.957	0.00400656
12/05/2014 06h	natural drought	C3	6.05503	20.495	293.645	0.0044342
12/05/2014 07h	natural drought	C3	83.0046	20.6259	293.776	0.00865823
12/05/2014 08h	natural drought	C3	540.153	24.6913	297.841	0.0526722
12/05/2014 09h	natural drought	C3	1066.53	27.1683	300.318	0.106793
12/05/2014 10h	natural drought	C3	623.052	26.0099	299.16	0.0804146
12/05/2014 11h	natural drought	C3	1039.4	25.8337	298.984	0.0792634
12/05/2014 12h	natural drought	C3	1271.92	26.7602	299.91	0.0787674
12/05/2014 13h	natural drought	C3	1528.05	27.2701	300.42	0.139386
12/05/2014 14h	natural drought	C3	1296.55	27.6894	300.839	0.0855412
12/05/2014 15h	natural drought	C3	1197.77	26.6286	299.779	0.0611036
12/05/2014 16h	natural drought	C3	719.045	24.9384	298.088	0.0364483
13/05/2014 21h	natural drought	C4	0.146195	19.0509	292.201	0.0111959
13/05/2014 22h	natural drought	C4	0.00124679	18.8006	291.951	0.0095285
13/05/2014 23h	natural drought	C4	0.00261875	18.6969	291.847	0.00569183
14/05/2014 00h	natural drought	C4	0.00247994	18.3504	291.5	0.00585816
14/05/2014 01h	natural drought	C4	0.00171154	17.8185	290.969	0.00459036
14/05/2014 02h	natural drought	C4	0.00200156	18.1334	291.283	0.00379318
14/05/2014 03h	natural drought	C4	0.00161983	18.0721	291.222	0.00412187
14/05/2014 04h	natural drought	C4	0.0015839	18.1438	291.294	0.00475044
14/05/2014 05h	natural drought	C4	0.00767281	17.7725	290.922	0.00291388
14/05/2014 06h	natural drought	C4	25.0549	18.4876	291.638	0.00530972
14/05/2014 07h	natural drought	C4	415.187	20.3607	293.511	0.0218882
14/05/2014 08h	natural drought	C4	837.637	22.4225	295.573	0.0572636
14/05/2014 09h	natural drought	C4	819.089	23.8532	297.003	0.0971486
14/05/2014 10h	natural drought	C4	1520.56	24.4471	297.597	0.0832486
14/05/2014 11h	natural drought	C4	1741.6	25.2146	298.365	0.156208
14/05/2014 12h	natural drought	C4	1864.46	26.1035	299.253	0.188169
14/05/2014 13h	natural drought	C4	1887.5	25.6408	298.791	0.201217
14/05/2014 14h	natural drought	C4	1814.39	25.9459	299.096	0.202556
14/05/2014 15h	natural drought	C4	1647.61	26.058	299.208	0.208057
14/05/2014 16h	natural drought	C4	1386.24	26.4832	299.633	0.17415
14/05/2014 17h	natural drought	C4	145.96	25.0099	298.16	0.102343
14/05/2014 18h	natural drought	C4	695.787	24.9911	298.141	0.0908099
15/05/2014 21h	natural drought	C5	0.293926	20.0924	293.242	0.0035854
15/05/2014 22h	natural drought	C5	0.00320373	19.4445	292.594	0.0031103
15/05/2014 23h	natural drought	C5	0.00252469	19.0412	292.191	0.0022871
16/05/2014 00h	natural drought	C5	0.00212736	18.9035	292.054	0.00215662
16/05/2014 01h	natural drought	C5	0.0031777	18.5835	291.734	0.00204401
16/05/2014 02h	natural drought	C5	0.00287157	18.3404	291.49	0.00118513
16/05/2014 03h	natural drought	C5	0.00267205	18.189	291.339	0.00172362
16/05/2014 04h	natural drought	C5	0.00170411	17.9337	291.084	0.00178338
16/05/2014 05h	natural drought	C5	0.00515819	17.8614	291.011	0.00143646
16/05/2014 06h	natural drought	C5	17.5472	17.6235	290.773	0.00155897
16/05/2014 07h	natural drought	C5	163.628	18.3512	291.501	0.00582815
16/05/2014 08h	natural drought	C5	735.62	21.0637	294.214	0.0294022
16/05/2014 09h	natural drought	C5	1153.72	22.9052	296.055	0.0421668
16/05/2014 10h	natural drought	C5	1531.35	23.8077	296.958	0.0509988
16/05/2014 11h	natural drought	C5	1790.47	24.5369	297.687	0.0728965
16/05/2014 12h	natural drought	C5	1950.85	25.2351	298.385	0.107234
16/05/2014 13h	natural drought	C5	2031.28	26.755	299.905	0.140752
16/05/2014 14h	natural drought	C5	1249.23	26.0836	299.234	0.0948381
16/05/2014 15h	natural drought	C5	1822.53	26.6421	299.792	0.0837088
16/05/2014 16h	natural drought	C5	600.377	24.8551	298.005	0.0692669
16/05/2014 17h	natural drought	C5	334.3	23.5133	296.663	0.0223248
16/05/2014 18h	natural drought	C5	198.047	22.8557	296.006	0.0126869
16/05/2014 19h	natural drought	C5	186.545	21.696	294.846	0.00932478
16/05/2014 20h	natural drought	C5	54.294	20.903	294.053	0.00411543
13/05/2014 21h	amplified drought	S1	18.1734	19.6037	292.754	0.00946243
13/05/2014 22h	amplified drought	S1	0.00597783	18.7341	291.884	0.00568907
13/05/2014 23h	amplified drought	S1	0.00612478	18.7199	291.87	0.00405657
14/05/2014 00h	amplified drought	S1	0.00533129	18.338	291.488	0.00386818
14/05/2014 01h	amplified drought	S1	0.00382083	18.1348	291.285	0.00243031
14/05/2014 02h	amplified drought	S1	0.00484689	18.0769	291.227	0.00316862
14/05/2014 03h	amplified drought	S1	0.00629457	18.0828	291.233	0.00355088
14/05/2014 04h	amplified drought	S1	0.00481663	18.4043	291.554	0.00341629
14/05/2014 05h	amplified drought	S1	0.00260997	17.9523	291.102	0.00221606
14/05/2014 06h	amplified drought	S1	0.782193	18.0018	291.152	0.00241584
14/05/2014 07h	amplified drought	S1	61.8257	19.2968	292.447	0.00675293
14/05/2014 08h	amplified drought	S1	126.839	20.7329	293.883	0.0122904
14/05/2014 09h	amplified drought	S1	126.451	22.2416	295.392	0.025328
14/05/2014 10h	amplified drought	S1	140.886	23.049	296.199	0.0364474
14/05/2014 11h	amplified drought	S1	1504.18	23.553	296.703	0.0434282
14/05/2014 12h	amplified drought	S1	761.491	22.7978	295.948	0.029615
14/05/2014 13h	amplified drought	S1	608.01	24.3081	297.458	0.0508712
14/05/2014 14h	amplified drought	S1	1797.09	23.7574	296.907	0.0355733
14/05/2014 15h	amplified drought	S1	1722.97	24.7065	297.857	0.0474497
14/05/2014 16h	amplified drought	S1	1548.15	24.8995	298.05	0.0609535
14/05/2014 17h	amplified drought	S1	1284.7	24.0153	297.165	0.0684912
14/05/2014 18h	amplified drought	S1	510.905	24.6209	297.771	0.0556026
11/05/2014 17h	amplified drought	S3	124.95	26.5358	299.686	0.0798069
11/05/2014 18h	amplified drought	S3	101.984	26.473	299.623	0.0863106
11/05/2014 19h	amplified drought	S3	88.2173	26.1391	299.289	0.0543703
11/05/2014 20h	amplified drought	S3	55.6785	25.6542	298.804	0.0406094
11/05/2014 21h	amplified drought	S3	3.10915	23.4911	296.641	0.00820832
11/05/2014 22h	amplified drought	S3	0.00161957	22.6847	295.835	0.00461578
11/05/2014 23h	amplified drought	S3	0.00207152	22.1328	295.283	0.00433128
12/05/2014 00h	amplified drought	S3	0.000551394	21.8081	294.958	0.0042773
12/05/2014 01h	amplified drought	S3	0.000930884	21.2631	294.413	0.00440182
12/05/2014 02h	amplified drought	S3	0.00110387	21.2249	294.375	0.00468564
12/05/2014 03h	amplified drought	S3	0.00103576	21.078	294.228	0.00395828
12/05/2014 04h	amplified drought	S3	0.00150283	20.8415	293.992	0.00284631
12/05/2014 05h	amplified drought	S3	0.00280133	20.8328	293.983	0.00339164
12/05/2014 06h	amplified drought	S3	0.0632907	20.6879	293.838	0.00334327
12/05/2014 07h	amplified drought	S3	26.991	20.3964	293.546	0.00408165
12/05/2014 08h	amplified drought	S3	460.247	22.2979	295.448	0.0164809
12/05/2014 09h	amplified drought	S3	472.853	23.4673	296.617	0.0212055
12/05/2014 10h	amplified drought	S3	545.86	24.767	297.917	0.0514425
12/05/2014 11h	amplified drought	S3	692.863	23.7073	296.857	0.0403396
12/05/2014 12h	amplified drought	S3	652.154	24.3942	297.544	0.0389325
12/05/2014 13h	amplified drought	S3	615.436	25.305	298.455	0.0523504
12/05/2014 14h	amplified drought	S3	427.454	25.2411	298.391	0.0519607
12/05/2014 15h	amplified drought	S3	244.06	25.1271	298.277	0.0468366
12/05/2014 16h	amplified drought	S3	170.881	25.4654	298.615	0.0476317
12/05/2014 19h	amplified drought	S4	152.85	22.7832	295.933	0.0164162
12/05/2014 20h	amplified drought	S4	40.9111	21.4062	294.556	0.00686197
12/05/2014 21h	amplified drought	S4	0.25507	20.7736	293.924	0.00356262
12/05/2014 22h	amplified drought	S4	0.00398301	20.432	293.582	0.0030725
12/05/2014 23h	amplified drought	S4	0.0055345	20.0109	293.161	0.000672195
13/05/2014 00h	amplified drought	S4	0.00439394	19.4626	292.613	5.10269e-05
13/05/2014 01h	amplified drought	S4	0.00360568	19.0605	292.211	0.00136614
13/05/2014 02h	amplified drought	S4	0.00510304	18.837	291.987	0.00154478
13/05/2014 03h	amplified drought	S4	0.00549773	18.4489	291.599	0.00140513
13/05/2014 04h	amplified drought	S4	0.00472477	18.2017	291.352	0.00200624
13/05/2014 05h	amplified drought	S4	0.00415921	18.1889	291.339	0.000976118
13/05/2014 06h	amplified drought	S4	9.81637	18.1669	291.317	0.00153935
13/05/2014 07h	amplified drought	S4	108.032	19.4352	292.585	0.00660164
13/05/2014 08h	amplified drought	S4	423.736	20.5493	293.699	0.0153495
13/05/2014 09h	amplified drought	S4	159.735	21.2283	294.378	0.0107591
13/05/2014 10h	amplified drought	S4	1146.08	23.6127	296.763	0.0501672
13/05/2014 11h	amplified drought	S4	1446.25	24.7065	297.857	0.0565623
13/05/2014 12h	amplified drought	S4	1669.47	24.3297	297.48	0.0821502
13/05/2014 13h	amplified drought	S4	1671.75	25.0129	298.163	0.0771814
13/05/2014 14h	amplified drought	S4	1697.52	24.4363	297.586	0.0832541
13/05/2014 15h	amplified drought	S4	1914.67	25.2437	298.394	0.084133
13/05/2014 16h	amplified drought	S4	1793.33	25.1401	298.29	0.0619827
13/05/2014 17h	amplified drought	S4	800.739	22.5477	295.698	0.0278471
18/05/2014 20h	amplified drought	S5	70.3115	22.3515	295.501	0.00849025
18/05/2014 21h	amplified drought	S5	7.09532	21.5733	294.723	0.00347591
18/05/2014 22h	amplified drought	S5	0.00377574	20.5392	293.689	0.00252784
18/05/2014 23h	amplified drought	S5	0.00259264	19.8281	292.978	0.00225821
19/05/2014 00h	amplified drought	S5	0.00145015	19.585	292.735	0.00245892
19/05/2014 01h	amplified drought	S5	0.00291052	19.506	292.656	0.00210389
19/05/2014 02h	amplified drought	S5	0.00298535	19.6059	292.756	0.00175223
19/05/2014 03h	amplified drought	S5	0.00357931	19.45	292.6	0.00214892
19/05/2014 04h	amplified drought	S5	0.00480833	19.357	292.507	0.00172517
19/05/2014 05h	amplified drought	S5	0.00359662	19.1309	292.281	0.00219773
19/05/2014 06h	amplified drought	S5	1.6014	18.9743	292.124	0.00220548
19/05/2014 07h	amplified drought	S5	65.9189	19.3562	292.506	0.00225521
19/05/2014 08h	amplified drought	S5	301.48	20.8394	293.989	0.0115143
19/05/2014 09h	amplified drought	S5	531.383	22.322	295.472	0.0369305
19/05/2014 10h	amplified drought	S5	690.282	23.2402	296.39	0.0409554
19/05/2014 11h	amplified drought	S5	1365.07	24.7016	297.852	0.0979757
19/05/2014 12h	amplified drought	S5	1587.99	25.1126	298.263	0.119746
19/05/2014 13h	amplified drought	S5	1724.13	26.0299	299.18	0.0492765
19/05/2014 14h	amplified drought	S5	1769.37	26.8106	299.961	0.123281
19/05/2014 15h	amplified drought	S5	1289.7	26.0123	299.162	0.0620843
19/05/2014 16h	amplified drought	S5	609.884	25.0377	298.188	0.0384694
19/05/2014 17h	amplified drought	S5	690.4	24.9172	298.067	0.0417639
19/05/2014 18h	amplified drought	S5	506.313	23.9888	297.139	0.0259633
19/05/2014 19h	amplified drought	S5	87.3436	22.883	296.033	0.00972803
15/05/2014 21h	amplified drought	S6	6.6394	20.4114	293.561	0.00585713
15/05/2014 22h	amplified drought	S6	0.0134141	19.6535	292.803	0.0037015
15/05/2014 23h	amplified drought	S6	0.00739899	19.3196	292.47	0.00398522
16/05/2014 00h	amplified drought	S6	0.00436252	19.1599	292.31	0.00339223
16/05/2014 01h	amplified drought	S6	0.004549	18.7845	291.934	0.00233857
16/05/2014 02h	amplified drought	S6	0.00595505	18.5441	291.694	0.00186771
16/05/2014 03h	amplified drought	S6	0.0075882	18.3295	291.479	0.00249193
16/05/2014 04h	amplified drought	S6	0.00764175	18.1799	291.33	0.00296812
16/05/2014 05h	amplified drought	S6	0.00661244	17.9877	291.138	0.00222118
16/05/2014 06h	amplified drought	S6	1.00029	17.8937	291.044	0.00214927
16/05/2014 07h	amplified drought	S6	82.9825	18.5675	291.717	0.00406663
16/05/2014 08h	amplified drought	S6	89.7516	19.8807	293.031	0.00760663
16/05/2014 09h	amplified drought	S6	213.843	21.656	294.806	0.023703
16/05/2014 10h	amplified drought	S6	171.394	22.941	296.091	0.0364429
16/05/2014 11h	amplified drought	S6	1761.76	24.2106	297.361	0.0432705
16/05/2014 12h	amplified drought	S6	1853.71	24.8318	297.982	0.0528428
16/05/2014 14h	amplified drought	S6	1444.83	24.9565	298.107	0.0539615
16/05/2014 15h	amplified drought	S6	1141.95	24.5388	297.689	0.0464987
16/05/2014 16h	amplified drought	S6	659.31	24.2176	297.368	0.0374868
16/05/2014 17h	amplified drought	S6	319.925	23.7399	296.89	0.023812
16/05/2014 18h	amplified drought	S6	112.302	22.9481	296.098	0.0200215
16/05/2014 19h	amplified drought	S6	121.505	21.9461	295.096	0.0149876
16/05/2014 20h	amplified drought	S6	116.751	21.2036	294.354	0.0067894

## Sheet: MACR+MVK+ISOPOOH summer
date	treatment	trees code	PAR	TEMP (°C)	TEMP (K)	Emissions Rate MACR+MVK+ISOPOOH (µgC.g(MS)-1.h-1)
18/07/2014 21h	natural drought	C1	50.7306	25.3427	298.493	0.0167465
18/07/2014 22h	natural drought	C1	4.85124	24.4338	297.584	-0.0265675
18/07/2014 23h	natural drought	C1	0.000606047	23.6442	296.794	0.00876997
19/07/2014 00h	natural drought	C1	0.000496981	23.6437	296.794	0.00915039
19/07/2014 01h	natural drought	C1	0.000549035	23.2512	296.401	0.0122511
19/07/2014 02h	natural drought	C1	0.000544139	23.0447	296.195	0.012348
19/07/2014 03h	natural drought	C1	0.000581257	22.943	296.093	-0.00423699
19/07/2014 04h	natural drought	C1	0.000815492	22.7637	295.914	-0.00377533
19/07/2014 05h	natural drought	C1	0.00096918	22.9457	296.096	-0.000614694
19/07/2014 06h	natural drought	C1	0.611574	22.7926	295.943	0.00480687
19/07/2014 07h	natural drought	C1	51.5035	23.3957	296.546	-0.00217715
19/07/2014 08h	natural drought	C1	370.871	24.137	297.287	0.0217455
19/07/2014 09h	natural drought	C1	355.977	24.9293	298.079	-0.00350252
19/07/2014 10h	natural drought	C1	774.427	25.7037	298.854	0.0738397
19/07/2014 11h	natural drought	C1	694.26	26.5338	299.684	0.0652172
19/07/2014 12h	natural drought	C1	1328.75	27.517	300.667	0.254734
19/07/2014 13h	natural drought	C1	872.419	28.1009	301.251	0.147736
19/07/2014 14h	natural drought	C1	763.107	27.7481	300.898	0.124506
19/07/2014 15h	natural drought	C1	1068.94	27.6564	300.806	0.225137
19/07/2014 16h	natural drought	C1	1609.95	29.1126	302.263	0.405115
19/07/2014 17h	natural drought	C1	1120.63	28.2481	301.398	0.230971
19/07/2014 18h	natural drought	C1	354.601	26.8757	300.026	0.0418052
19/07/2014 19h	natural drought	C1	386.22	26.4752	299.625	0.0379321
15/07/2014 19h	natural drought	C2	290.237	27.2609	300.411	0.227862
15/07/2014 20h	natural drought	C2	72.8629	25.3011	298.451	0.0947602
15/07/2014 21h	natural drought	C2	0.349464	24.0139	297.164	0.0192006
15/07/2014 22h	natural drought	C2	0.00124803	23.5188	296.669	0.0145238
15/07/2014 23h	natural drought	C2	0.000861349	23.2408	296.391	0.0037112
16/07/2014 00h	natural drought	C2	0.00107949	22.7736	295.924	0.0192906
16/07/2014 01h	natural drought	C2	0.00147001	22.2925	295.442	0.00722163
16/07/2014 02h	natural drought	C2	0.00165825	22.0682	295.218	0.00756644
16/07/2014 03h	natural drought	C2	0.00183175	22.0428	295.193	0.0370667
16/07/2014 04h	natural drought	C2	0.00181441	21.8475	294.998	0.191063
16/07/2014 05h	natural drought	C2	0.530105	21.7107	294.861	0.244414
16/07/2014 06h	natural drought	C2	88.0713	22.2517	295.402	0.0437105
16/07/2014 07h	natural drought	C2	416.761	25.1258	298.276	0.434416
16/07/2014 08h	natural drought	C2	800.631	26.4107	299.561	0.434416
16/07/2014 09h	natural drought	C2	1166.51	27.8603	301.01	0.228602
16/07/2014 10h	natural drought	C2	1479.95	28.5153	301.665	0.309439
16/07/2014 11h	natural drought	C2	1709.2	29.5897	302.74	0.40964
16/07/2014 12h	natural drought	C2	1860.83	30.8081	303.958	0.504068
16/07/2014 13h	natural drought	C2	1923.35	31.1159	304.266	0.54001
16/07/2014 14h	natural drought	C2	1870.08	31.5441	304.694	0.526804
16/07/2014 15h	natural drought	C2	1729.64	30.9769	304.127	0.478211
16/07/2014 16h	natural drought	C2	1482.07	30.1989	303.349	0.412057
16/07/2014 17h	natural drought	C2	1165.65	28.5463	301.696	0.306942
16/07/2014 18h	natural drought	C2	805.961	28.0769	301.227	0.237989
14/07/2014 18h	natural drought	C3	784.863	25.3803	298.53	0.0938977
14/07/2014 19h	natural drought	C3	230.205	24.3588	297.509	0.0314911
14/07/2014 20h	natural drought	C3	168.503	23.8583	297.008	0.0203565
14/07/2014 21h	natural drought	C3	24.2952	23.0933	296.243	0.00281977
14/07/2014 22h	natural drought	C3	0.0098491	22.401	295.551	0.00221617
14/07/2014 23h	natural drought	C3	0.00201767	22.0873	295.237	0.00186928
15/07/2014 00h	natural drought	C3	0.00238203	21.9027	295.053	0.00156238
15/07/2014 01h	natural drought	C3	0.00255927	21.6217	294.772	0.00233148
15/07/2014 02h	natural drought	C3	0.00201147	21.4368	294.587	0.000421788
15/07/2014 03h	natural drought	C3	0.0027805	21.1037	294.254	0.000225552
15/07/2014 04h	natural drought	C3	0.00140046	20.9222	294.072	0.015258
15/07/2014 05h	natural drought	C3	0.00252765	20.8382	293.988	0.0186672
15/07/2014 06h	natural drought	C3	7.87772	20.7457	293.896	0.0130879
15/07/2014 07h	natural drought	C3	130.089	21.3465	294.496	0.0409604
15/07/2014 08h	natural drought	C3	477.177	22.5882	295.738	0.142105
15/07/2014 09h	natural drought	C3	775.622	23.8825	297.032	0.439305
15/07/2014 10h	natural drought	C3	1036.68	24.9495	298.099	0.136521
15/07/2014 11h	natural drought	C3	1634.17	27.0867	300.237	0.352136
15/07/2014 12h	natural drought	C3	1792.37	27.7228	300.873	0.347574
15/07/2014 13h	natural drought	C3	1777.95	27.7167	300.867	0.358228
15/07/2014 14h	natural drought	C3	1865.62	29.0686	302.219	0.387271
15/07/2014 15h	natural drought	C3	1790.4	29.2034	302.353	0.433002
15/07/2014 16h	natural drought	C3	1178.05	28.452	301.602	0.141134
15/07/2014 17h	natural drought	C3	587.013	28.2055	301.356	0.101989
16/07/2014 22h	natural drought	C4	0.18993	23.4945	296.644	0.00759578
16/07/2014 23h	natural drought	C4	0.000638269	23.2782	296.428	0.0149726
17/07/2014 00h	natural drought	C4	0.000369327	22.7181	295.868	0.0150194
17/07/2014 01h	natural drought	C4	0.000416486	22.7514	295.901	0.025285
17/07/2014 02h	natural drought	C4	0.000603567	22.3216	295.472	-0.0010853
17/07/2014 03h	natural drought	C4	0.0011303	21.8123	294.962	0.00475071
17/07/2014 04h	natural drought	C4	0.00111171	21.8881	295.038	0.00693349
17/07/2014 05h	natural drought	C4	0.00128272	22.0096	295.16	0.0236774
17/07/2014 06h	natural drought	C4	0.470487	21.5642	294.714	0.00515158
17/07/2014 07h	natural drought	C4	48.5345	21.5441	294.694	0.028817
17/07/2014 08h	natural drought	C4	99.1863	22.9493	296.099	0.0169859
17/07/2014 09h	natural drought	C4	707.982	24.941	298.091	0.066949
17/07/2014 10h	natural drought	C4	563.22	25.8725	299.022	0.0183934
17/07/2014 11h	natural drought	C4	144.669	26.9155	300.065	0.196852
17/07/2014 12h	natural drought	C4	1703.97	29.1153	302.265	0.475699
17/07/2014 13h	natural drought	C4	1858.93	29.8663	303.016	0.321592
17/07/2014 14h	natural drought	C4	1909.15	30.1382	303.288	0.332748
17/07/2014 15h	natural drought	C4	1884.12	29.8261	302.976	0.338289
17/07/2014 16h	natural drought	C4	1750.72	29.6498	302.8	0.463904
17/07/2014 17h	natural drought	C4	892.679	28.5962	301.746	0.0684024
17/07/2014 18h	natural drought	C4	1155.03	29.2343	302.384	0.118478
17/07/2014 19h	natural drought	C4	735.133	28.5197	301.67	0.0860332
17/07/2014 21h	natural drought	C5	41.0157	25.5991	298.749	0.00601072
17/07/2014 22h	natural drought	C5	0.0892037	24.4787	297.629	0.00736273
17/07/2014 23h	natural drought	C5	0.00116872	23.9899	297.14	0.00989639
18/07/2014 00h	natural drought	C5	0.000927033	23.4014	296.551	0.00304549
18/07/2014 01h	natural drought	C5	0.000789473	23.2761	296.426	0.00509767
18/07/2014 02h	natural drought	C5	0.000679193	22.8899	296.04	-0.00259998
18/07/2014 03h	natural drought	C5	0.000845245	22.6437	295.794	0.00753607
18/07/2014 04h	natural drought	C5	0.000767159	22.5667	295.717	-0.00451187
18/07/2014 05h	natural drought	C5	0.00134223	22.5623	295.712	0.00360121
18/07/2014 06h	natural drought	C5	0.646544	22.4961	295.646	-0.000960659
18/07/2014 07h	natural drought	C5	90.7809	22.6913	295.841	0.00773339
18/07/2014 08h	natural drought	C5	436.22	24.6028	297.753	0.018383
18/07/2014 09h	natural drought	C5	846.66	26.2485	299.398	0.18657
18/07/2014 10h	natural drought	C5	1213.55	27.8686	301.019	0.283555
18/07/2014 11h	natural drought	C5	1517.56	28.4459	301.596	0.351215
18/07/2014 12h	natural drought	C5	1737.59	29.5733	302.723	0.457262
18/07/2014 13h	natural drought	C5	1875.47	30.1661	303.316	0.488266
18/07/2014 14h	natural drought	C5	1872.59	30.3236	303.474	0.486198
18/07/2014 15h	natural drought	C5	1757.01	30.7451	303.895	0.354213
18/07/2014 16h	natural drought	C5	1558.72	30.8241	303.974	0.223116
18/07/2014 17h	natural drought	C5	1254.81	28.9029	302.053	0.142458
18/07/2014 18h	natural drought	C5	828.342	28.0477	301.198	0.0932538
18/07/2014 19h	natural drought	C5	162.38	28.2439	301.394	0.162701
16/07/2014 21h	amplified drought	S1	5.10434	24.1844	297.334	0.0518208
16/07/2014 22h	amplified drought	S1	0.00759303	23.4237	296.574	0.0022257
16/07/2014 23h	amplified drought	S1	0.00331919	23.0707	296.221	0.007231
17/07/2014 00h	amplified drought	S1	0.00446521	22.7842	295.934	0.00477195
17/07/2014 01h	amplified drought	S1	0.00446521	22.7842	295.934	0.00629574
17/07/2014 02h	amplified drought	S1	0.0014185	22.1639	295.314	-0.00196512
17/07/2014 03h	amplified drought	S1	0.00320023	22.1201	295.27	-0.000965086
17/07/2014 04h	amplified drought	S1	0.00133957	22.1744	295.324	-0.00130166
17/07/2014 05h	amplified drought	S1	0.0113339	21.9945	295.145	0.00115804
17/07/2014 06h	amplified drought	S1	22.8381	21.7319	294.882	-0.0044992
17/07/2014 07h	amplified drought	S1	152.101	22.9593	296.109	-0.0185861
17/07/2014 08h	amplified drought	S1	648.005	25.1908	298.341	-0.0143432
17/07/2014 09h	amplified drought	S1	151.331	25.6313	298.781	-0.0364853
17/07/2014 10h	amplified drought	S1	1355.85	27.0447	300.195	0.134468
17/07/2014 11h	amplified drought	S1	1606.87	27.7334	300.883	0.0605148
17/07/2014 12h	amplified drought	S1	1771.01	29.4008	302.551	0.138754
17/07/2014 13h	amplified drought	S1	1773.85	29.5815	302.732	0.22654
17/07/2014 14h	amplified drought	S1	1762.33	29.0395	302.19	0.1735
17/07/2014 15h	amplified drought	S1	1717.95	29.6655	302.815	0.231396
17/07/2014 16h	amplified drought	S1	1414.69	30.5719	303.722	0.23384
17/07/2014 17h	amplified drought	S1	1229.43	30.5985	303.748	0.243263
17/07/2014 18h	amplified drought	S1	764.585	29.9151	303.065	0.212466
14/07/2014 17h	amplified drought	S3	384.93	28.0592	301.209	0.329519
14/07/2014 18h	amplified drought	S3	134.555	27.7103	300.86	0.139528
14/07/2014 19h	amplified drought	S3	80.0103	24.7439	297.894	0.0543761
14/07/2014 20h	amplified drought	S3	41.0832	24.3989	297.549	0.0111676
14/07/2014 21h	amplified drought	S3	0.946492	23.1452	296.295	0.00183562
14/07/2014 22h	amplified drought	S3	0.00437489	22.5782	295.728	0.00283853
14/07/2014 23h	amplified drought	S3	0.00180376	22.38	295.53	0.00223852
15/07/2014 00h	amplified drought	S3	0.00475432	22.1354	295.285	-0.0010157
15/07/2014 01h	amplified drought	S3	0.00495783	21.766	294.916	0.00159871
15/07/2014 02h	amplified drought	S3	0.0017796	21.4701	294.62	0.00321929
15/07/2014 03h	amplified drought	S3	0.000466707	21.2452	294.395	0.0276265
15/07/2014 04h	amplified drought	S3	0.0046504	21.1426	294.293	0.0181189
15/07/2014 05h	amplified drought	S3	0.0200795	21.0258	294.176	0.0209363
15/07/2014 06h	amplified drought	S3	15.9175	21.0273	294.177	0.0261978
15/07/2014 07h	amplified drought	S3	77.7159	21.4669	294.617	0.0473867
15/07/2014 08h	amplified drought	S3	113.013	22.6108	295.761	0.0688281
15/07/2014 09h	amplified drought	S3	164.046	23.4208	296.571	0.0358028
15/07/2014 10h	amplified drought	S3	549.037	25.4925	298.642	0.0795032
15/07/2014 11h	amplified drought	S3	347.935	25.818	298.968	0.0589196
15/07/2014 12h	amplified drought	S3	1322.34	27.4723	300.622	0.136559
15/07/2014 13h	amplified drought	S3	1659.33	27.3464	300.496	0.134552
15/07/2014 14h	amplified drought	S3	1219.18	28.9446	302.095	0.219808
15/07/2014 15h	amplified drought	S3	1536.54	28.2425	301.392	0.125665
15/07/2014 16h	amplified drought	S3	782.156	28.3668	301.517	0.0942217
16/07/2014 09h	amplified drought	S4	992.32	26.534	299.684	-0.00491104
16/07/2014 10h	amplified drought	S4	285.168	25.8486	298.999	0.00202925
16/07/2014 11h	amplified drought	S4	157.82	26.3701	299.52	0.00817588
16/07/2014 12h	amplified drought	S4	1136.51	29.6102	302.76	0.186858
16/07/2014 13h	amplified drought	S4	561.959	29.8966	303.047	0.295629
16/07/2014 14h	amplified drought	S4	1789.97	30.9226	304.073	0.327153
16/07/2014 15h	amplified drought	S4	1689.91	31.6481	304.798	0.283297
16/07/2014 16h	amplified drought	S4	1488.34	31.1851	304.335	0.243663
16/07/2014 17h	amplified drought	S4	1074.29	28.5398	301.69	0.115661
16/07/2014 18h	amplified drought	S4	844.566	29.3615	302.512	0.187549
16/07/2014 19h	amplified drought	S4	357.927	28.3077	301.458	0.097049
18/07/2014 20h	amplified drought	S5	33.7129	26.1643	299.314	-0.0072771
18/07/2014 21h	amplified drought	S5	1.85088	25.0201	298.17	0.0464419
18/07/2014 22h	amplified drought	S5	0.00325973	24.1883	297.338	0.0327218
18/07/2014 23h	amplified drought	S5	0.0061162	23.9073	297.057	0.0083237
19/07/2014 00h	amplified drought	S5	0.00231151	23.7893	296.939	-0.00481386
19/07/2014 01h	amplified drought	S5	0.00423733	23.3954	296.545	0.0139789
19/07/2014 02h	amplified drought	S5	0.00834625	23.3437	296.494	0.00765295
19/07/2014 03h	amplified drought	S5	0.0100295	23.1526	296.303	0.0163949
19/07/2014 04h	amplified drought	S5	0.0111311	23.3399	296.49	0.00120759
19/07/2014 05h	amplified drought	S5	0.6593	23.2472	296.397	0.0147244
19/07/2014 06h	amplified drought	S5	13.6969	23.5469	296.697	-0.00624914
19/07/2014 07h	amplified drought	S5	131.062	23.8708	297.021	-0.029967
19/07/2014 08h	amplified drought	S5	318.309	25.6626	298.813	-0.0312985
19/07/2014 09h	amplified drought	S5	700.248	26.1611	299.311	0.0660575
19/07/2014 10h	amplified drought	S5	679.664	26.7661	299.916	0.0244979
19/07/2014 11h	amplified drought	S5	603.096	27.0822	300.232	0.0550351
19/07/2014 12h	amplified drought	S5	728.372	28.2086	301.359	0.193839
19/07/2014 13h	amplified drought	S5	427.196	27.7456	300.896	0.171732
19/07/2014 14h	amplified drought	S5	479.386	27.3827	300.533	0.0843113
19/07/2014 15h	amplified drought	S5	1136.78	29.3925	302.542	0.248755
19/07/2014 16h	amplified drought	S5	601.119	29.6149	302.765	0.149317
19/07/2014 17h	amplified drought	S5	357.733	27.9469	301.097	0.0647386
19/07/2014 18h	amplified drought	S5	248.632	26.8017	299.952	0.0227808
17/07/2014 20h	amplified drought	S6	73.4635	26.4111	299.561	0.0600794
17/07/2014 21h	amplified drought	S6	3.39551	24.9922	298.142	0.0127629
17/07/2014 22h	amplified drought	S6	0.0155429	24.2253	297.375	0.0162756
17/07/2014 23h	amplified drought	S6	0.0054307	23.6868	296.837	0.0128237
18/07/2014 00h	amplified drought	S6	0.00673777	23.4698	296.62	0.00288651
18/07/2014 01h	amplified drought	S6	0.00517555	23.173	296.323	0.000747709
18/07/2014 02h	amplified drought	S6	0.0154012	22.8097	295.96	0.000512951
18/07/2014 03h	amplified drought	S6	0.0146305	22.679	295.829	0.0116637
18/07/2014 04h	amplified drought	S6	0.0133028	22.5685	295.718	-0.00425584
18/07/2014 05h	amplified drought	S6	0.00894783	22.5039	295.654	0.00854535
18/07/2014 06h	amplified drought	S6	21.6028	22.5285	295.679	0.00371967
18/07/2014 07h	amplified drought	S6	142.2	24.7504	297.9	0.0264002
18/07/2014 08h	amplified drought	S6	247.791	25.8919	299.042	0.100101
18/07/2014 09h	amplified drought	S6	437.807	27.4847	300.635	0.104833
18/07/2014 10h	amplified drought	S6	1395.97	28.0313	301.181	0.11935
18/07/2014 11h	amplified drought	S6	1605.3	28.9002	302.05	0.165485
18/07/2014 12h	amplified drought	S6	1709.18	29.5982	302.748	0.280731
18/07/2014 13h	amplified drought	S6	1728.18	30.2944	303.444	0.30216
18/07/2014 14h	amplified drought	S6	1848.82	30.751	303.901	0.260127
18/07/2014 15h	amplified drought	S6	305.109	30.3271	303.477	0.242715
18/07/2014 16h	amplified drought	S6	1250.59	29.1152	302.265	0.112077
18/07/2014 17h	amplified drought	S6	986.92	30.1312	303.281	0.162197
18/07/2014 18h	amplified drought	S6	668.793	29.9903	303.14	0.155798
18/07/2014 19h	amplified drought	S6	215.766	28.0747	301.225	0.143979

## Sheet: MACR+MVK+ISOPOOH autumn
date	treatment	trees code	PAR	TEMP (°C)	TEMP (K)	Emissions Rate MACR+MVK+ISOPOOH (µgC.g(MS)-1.h-1)
26/10/2013 19h	natural drought	C1	0.0459538	22.3075	295.458	0.00130251
26/10/2013 20h	natural drought	C1	0.00513676	21.8153	294.965	0.00244508
26/10/2013 21h	natural drought	C1	0.00339211	21.4997	294.65	0.00272853
26/10/2013 22h	natural drought	C1	0.00744189	21.363	294.513	0.000826909
26/10/2013 23h	natural drought	C1	0.00704861	21.2819	294.432	0.00165535
27/10/2013 00h	natural drought	C1	0.0031554	21.05	294.2	0.00140919
27/10/2013 01h	natural drought	C1	0.00784299	20.9689	294.119	0.000978251
27/10/2013 02h	natural drought	C1	0.00912455	20.8649	294.015	0.00135705
27/10/2013 03h	natural drought	C1	0.00693572	20.8796	294.03	0.00121313
27/10/2013 04h	natural drought	C1	0.0112585	21.0113	294.161	0.00073088
27/10/2013 05h	natural drought	C1	0.0107643	21.2223	294.372	0.000864218
27/10/2013 06h	natural drought	C1	0.00872731	21.2334	294.383	0.00080722
27/10/2013 07h	natural drought	C1	0.00873984	21.1651	294.315	0.00129318
27/10/2013 08h	natural drought	C1	13.4458	21.0856	294.236	0.000699362
27/10/2013 09h	natural drought	C1	248.222	22.3484	295.498	0.0142972
27/10/2013 10h	natural drought	C1	138.832	23.2606	296.411	0.0637542
27/10/2013 11h	natural drought	C1	191.777	23.6609	296.811	0.032433
27/10/2013 12h	natural drought	C1	439.234	23.5896	296.74	0.0198094
27/10/2013 13h	natural drought	C1	850.223	24.8491	297.999	0.0567998
27/10/2013 14h	natural drought	C1	878.376	25.4939	298.644	0.062067
27/10/2013 15h	natural drought	C1	1058.53	26.3407	299.491	0.0581985
27/10/2013 16h	natural drought	C1	385.053	25.2028	298.353	0.0454481
27/10/2013 17h	natural drought	C1	270.138	25.1451	298.295	0.0307339
27/10/2013 18h	natural drought	C1	52.7722	23.3831	296.533	0.00494076
18/10/2013 20h	natural drought	C2	0.00776519	21.3177	294.468	0.00295026
18/10/2013 21h	natural drought	C2	0.00641513	20.9045	294.055	0.00237231
18/10/2013 22h	natural drought	C2	0.00604657	21.1145	294.264	0.00127687
18/10/2013 23h	natural drought	C2	0.00500963	21.1181	294.268	0.0029984
19/10/2013 00h	natural drought	C2	0.0071727	21.1912	294.341	0.00565019
19/10/2013 01h	natural drought	C2	0.00899787	21.0764	294.226	0.0056178
19/10/2013 02h	natural drought	C2	0.00563119	20.9176	294.068	0.00310554
19/10/2013 03h	natural drought	C2	0.0112295	20.9832	294.133	0.00176785
19/10/2013 04h	natural drought	C2	0.00516012	20.8831	294.033	0.0020004
19/10/2013 05h	natural drought	C2	0.0057474	20.6621	293.812	0.0014604
19/10/2013 06h	natural drought	C2	0.00713241	20.4356	293.586	0.00154656
19/10/2013 07h	natural drought	C2	0.0299808	20.3693	293.519	0.00122281
19/10/2013 08h	natural drought	C2	48.6386	20.7672	293.917	0.00240058
19/10/2013 09h	natural drought	C2	231.125	22.5376	295.688	0.0125983
19/10/2013 10h	natural drought	C2	617.838	23.7388	296.889	0.0511664
19/10/2013 11h	natural drought	C2	819.845	24.2588	297.409	0.0562697
19/10/2013 12h	natural drought	C2	1236.89	25.2212	298.371	0.0885279
19/10/2013 13h	natural drought	C2	923.578	25.4438	298.594	0.0550135
19/10/2013 14h	natural drought	C2	1006.93	25.2313	298.381	0.0591248
19/10/2013 15h	natural drought	C2	341.708	25.0296	298.18	0.0495493
19/10/2013 16h	natural drought	C2	548.282	24.6682	297.818	0.0382939
19/10/2013 17h	natural drought	C2	183.087	23.5131	296.663	0.0125292
19/10/2013 18h	natural drought	C2	81.0206	22.9055	296.056	0.00739351
19/10/2013 19h	natural drought	C2	0.171913	21.3395	294.49	0.00349611
16/10/2013 01h	natural drought	C3	0.00778381	20.0394	293.189	0.00406792
16/10/2013 02h	natural drought	C3	0.0117082	20.3262	293.476	0.00293738
16/10/2013 03h	natural drought	C3	0.0147983	20.4023	293.552	0.00322471
16/10/2013 04h	natural drought	C3	0.0160551	20.3245	293.475	0.00323895
16/10/2013 05h	natural drought	C3	0.0205077	20.187	293.337	0.00254076
16/10/2013 06h	natural drought	C3	0.00612985	20.3009	293.451	0.00215476
16/10/2013 07h	natural drought	C3	0.0037749	20.2166	293.367	0.0032612
16/10/2013 08h	natural drought	C3	4.34017	20.3663	293.516	0.00308838
16/10/2013 09h	natural drought	C3	198.331	21.1501	294.3	0.00891502
16/10/2013 10h	natural drought	C3	436.816	22.525	295.675	0.0261879
16/10/2013 11h	natural drought	C3	656.967	23.3899	296.54	0.0414391
16/10/2013 12h	natural drought	C3	919.178	24.2205	297.37	0.039736
16/10/2013 13h	natural drought	C3	947.797	23.8048	296.955	0.0442498
16/10/2013 14h	natural drought	C3	973.234	24.063	297.213	0.0225371
16/10/2013 15h	natural drought	C3	190.735	23.5335	296.683	0.0308257
16/10/2013 16h	natural drought	C3	744.942	23.9472	297.097	0.0244408
16/10/2013 17h	natural drought	C3	177.997	22.7603	295.91	0.00930698
16/10/2013 18h	natural drought	C3	40.9235	21.2231	294.373	0.00305327
16/10/2013 19h	natural drought	C3	9.03071	20.906	294.056	0.0018755
16/10/2013 20h	natural drought	C3	0.00343126	20.6258	293.776	0.000972398
16/10/2013 21h	natural drought	C3	0.00245336	20.513	293.663	0.00127698
16/10/2013 22h	natural drought	C3	0.0043577	20.1745	293.325	0.000857435
16/10/2013 23h	natural drought	C3	0.0125584	20.1488	293.299	0.00497628
15/10/2013 00h	natural drought	C3	0.00608258	20.0167	293.167	0.0043216
20/10/2013 21h	natural drought	C4	0.0259938	21.0124	294.162	0.00144933
20/10/2013 22h	natural drought	C4	0.0211484	20.7849	293.935	0.0015401
20/10/2013 23h	natural drought	C4	0.067014	20.7731	293.923	0.000950354
21/10/2013 00h	natural drought	C4	0.00485588	21.0261	294.176	0.00437194
21/10/2013 01h	natural drought	C4	0.0378152	20.9055	294.055	0.00161341
21/10/2013 02h	natural drought	C4	0.0187045	20.8885	294.039	0.00287618
21/10/2013 03h	natural drought	C4	0.0434124	20.7664	293.916	0.000672336
21/10/2013 04h	natural drought	C4	0.186227	20.7867	293.937	0.00152343
21/10/2013 05h	natural drought	C4	0.15785	20.6128	293.763	0.00168375
21/10/2013 06h	natural drought	C4	0.171815	20.8444	293.994	0.00167412
21/10/2013 07h	natural drought	C4	0.0619379	20.8752	294.025	0.000901556
21/10/2013 08h	natural drought	C4	1.34823	20.5461	293.696	0.0017903
21/10/2013 09h	natural drought	C4	66.5843	21.0515	294.201	0.00299236
21/10/2013 10h	natural drought	C4	120.184	21.6466	294.797	0.00973024
21/10/2013 11h	natural drought	C4	498.154	23.188	296.338	0.0149791
21/10/2013 12h	natural drought	C4	261.859	23.3206	296.471	0.015321
21/10/2013 13h	natural drought	C4	438.466	23.8916	297.042	0.0248919
21/10/2013 14h	natural drought	C4	851.675	25.2277	298.378	0.0590298
21/10/2013 15h	natural drought	C4	461.249	25.3413	298.491	0.0266533
21/10/2013 16h	natural drought	C4	163.083	24.0333	297.183	0.0146022
21/10/2013 17h	natural drought	C4	130.22	23.5987	296.749	0.00758788
21/10/2013 18h	natural drought	C4	39.956	22.4732	295.623	0.00328771
21/10/2013 19h	natural drought	C4	0.682787	21.6943	294.844	0.0018908
21/10/2013 20h	natural drought	C4	0.129465	21.1618	294.312	0.00301526
23/10/2013 19h	natural drought	C5	0.0112044	22.3839	295.534	0.00915418
23/10/2013 20h	natural drought	C5	0.00266057	21.8761	295.026	0.00340091
23/10/2013 21h	natural drought	C5	0.00766627	21.4741	294.624	0.00124902
23/10/2013 22h	natural drought	C5	0.00409372	21.3003	294.45	0.00176606
23/10/2013 23h	natural drought	C5	0.0194091	21.1806	294.331	0.0127265
24/10/2013 00h	natural drought	C5	0.00958644	21.0193	294.169	0.0084977
24/10/2013 01h	natural drought	C5	0.0117415	20.9373	294.087	0.00691141
24/10/2013 02h	natural drought	C5	0.0164027	20.9068	294.057	0.0060824
24/10/2013 03h	natural drought	C5	0.0157257	20.8795	294.029	0.004124
24/10/2013 04h	natural drought	C5	0.00975805	21.1323	294.282	0.00900193
24/10/2013 05h	natural drought	C5	0.0182055	21.3482	294.498	0.00496006
24/10/2013 06h	natural drought	C5	0.0137541	21.4406	294.591	0.00284698
24/10/2013 07h	natural drought	C5	0.0107943	21.6056	294.756	0.00347756
24/10/2013 08h	natural drought	C5	17.8341	20.9793	294.129	0.00489362
24/10/2013 09h	natural drought	C5	95.7984	21.4562	294.606	0.00458511
24/10/2013 10h	natural drought	C5	167.394	22.1345	295.284	0.0128547
24/10/2013 11h	natural drought	C5	198.331	22.4886	295.639	0.0230325
24/10/2013 12h	natural drought	C5	360.313	23.4566	296.607	0.0262386
24/10/2013 13h	natural drought	C5	646.177	24.0563	297.206	0.033379
24/10/2013 14h	natural drought	C5	336.601	24.0297	297.18	0.0274634
24/10/2013 15h	natural drought	C5	336.159	24.6895	297.839	0.034298
24/10/2013 16h	natural drought	C5	164.635	23.8672	297.017	0.0148553
24/10/2013 17h	natural drought	C5	187.046	23.8589	297.009	0.0163606
24/10/2013 18h	natural drought	C5	13.4974	23.3325	296.482	0.00334042
20/10/2013 09h	amplified drought	S1	86.7415	21.4948	294.645	0.00581675
20/10/2013 10h	amplified drought	S1	329.654	22.5858	295.736	0.0124519
20/10/2013 11h	amplified drought	S1	425.259	23.5462	296.696	0.038833
20/10/2013 12h	amplified drought	S1	632.531	24.3306	297.481	0.0679778
20/10/2013 13h	amplified drought	S1	720.336	25.9735	299.124	0.116858
20/10/2013 14h	amplified drought	S1	554.956	25.2846	298.435	0.0843426
20/10/2013 15h	amplified drought	S1	181.663	24.0009	297.151	0.034668
20/10/2013 16h	amplified drought	S1	184.476	23.5981	296.748	0.0235661
20/10/2013 17h	amplified drought	S1	87.5907	22.7856	295.936	0.00521542
20/10/2013 18h	amplified drought	S1	5.28489	21.9607	295.111	0.00280428
20/10/2013 19h	amplified drought	S1	0.0168252	21.4744	294.624	0.000405282
20/10/2013 20h	amplified drought	S1	0.00827091	21.1725	294.322	0.00191162
20/10/2013 21h	amplified drought	S1	0.00898234	20.991	294.141	0.000763985
20/10/2013 22h	amplified drought	S1	0.00492042	20.3956	293.546	0.0014018
20/10/2013 23h	amplified drought	S1	0.00771627	21.4179	294.568	0.00208372
21/10/2013 00h	amplified drought	S1	0.00569345	21.5088	294.659	0.00244875
21/10/2013 01h	amplified drought	S1	0.0108786	21.1274	294.277	0.0020206
21/10/2013 02h	amplified drought	S1	0.00844719	21.4234	294.573	0.000826897
21/10/2013 03h	amplified drought	S1	0.00723518	21.1457	294.296	0.00224716
21/10/2013 04h	amplified drought	S1	0.00756609	20.8887	294.039	0.00239847
21/10/2013 05h	amplified drought	S1	0.00204125	20.8576	294.008	0.00090874
21/10/2013 06h	amplified drought	S1	0.00473875	21.0921	294.242	0.0028404
21/10/2013 07h	amplified drought	S1	0.00625891	21.0267	294.177	0.000684179
21/10/2013 08h	amplified drought	S1	26.6267	20.8889	294.039	0.00274135
16/10/2013 00h	amplified drought	S3	0.0065037	20.2156	293.366	0.00179033
16/10/2013 01h	amplified drought	S3	0.00474819	20.2952	293.445	0.000937466
16/10/2013 02h	amplified drought	S3	0.00762576	20.4426	293.593	0.0014307
16/10/2013 03h	amplified drought	S3	0.010862	20.466	293.616	0.00183034
16/10/2013 04h	amplified drought	S3	0.00913649	20.3345	293.485	0.000876197
16/10/2013 05h	amplified drought	S3	0.00787998	20.3507	293.501	0.00177898
16/10/2013 06h	amplified drought	S3	0.00536298	20.4409	293.591	0.00215219
16/10/2013 07h	amplified drought	S3	0.00628588	20.452	293.602	0.00167469
16/10/2013 08h	amplified drought	S3	15.7163	20.503	293.653	0.0018767
16/10/2013 09h	amplified drought	S3	56.6324	21.0008	294.151	0.00386435
16/10/2013 10h	amplified drought	S3	296.996	21.8139	294.964	0.0107614
16/10/2013 11h	amplified drought	S3	597.413	23.1752	296.325	0.0699921
16/10/2013 12h	amplified drought	S3	638.018	23.4259	296.576	0.073149
16/10/2013 13h	amplified drought	S3	678.787	23.8632	297.013	0.114656
16/10/2013 14h	amplified drought	S3	421.906	24.6794	297.829	0.127671
16/10/2013 15h	amplified drought	S3	272.964	24.3981	297.548	0.103868
16/10/2013 16h	amplified drought	S3	522.91	25.7129	298.863	0.0703065
16/10/2013 17h	amplified drought	S3	63.0551	24.0752	297.225	0.00785898
16/10/2013 18h	amplified drought	S3	12.7898	21.2417	294.392	0.00239488
16/10/2013 19h	amplified drought	S3	0.193234	20.9747	294.125	0.00121491
16/10/2013 20h	amplified drought	S3	0.00775914	20.7813	293.931	0.00155696
16/10/2013 21h	amplified drought	S3	0.0104417	20.5395	293.69	0.00184061
16/10/2013 22h	amplified drought	S3	0.00904663	20.2461	293.396	0.000528782
16/10/2013 23h	amplified drought	S3	0.00287238	20.2157	293.366	0.00343655
18/10/2013 21h	amplified drought	S4	0.00726202	21.3151	294.465	0.00150284
18/10/2013 22h	amplified drought	S4	0.00480429	21.2036	294.354	0.000927312
18/10/2013 23h	amplified drought	S4	0.00785356	21.3794	294.529	0.00085652
19/10/2013 00h	amplified drought	S4	0.00671882	21.3768	294.527	0.00117724
19/10/2013 01h	amplified drought	S4	0.0040652	21.4153	294.565	0.00109557
19/10/2013 02h	amplified drought	S4	0.00542593	21.2039	294.354	0.00140171
19/10/2013 03h	amplified drought	S4	0.00355658	21.0833	294.233	0.00127596
19/10/2013 04h	amplified drought	S4	0.00579281	21.1205	294.27	0.000986666
19/10/2013 05h	amplified drought	S4	0.00922424	21.0445	294.195	0.00136424
19/10/2013 06h	amplified drought	S4	0.00606859	20.7632	293.913	0.00108865
19/10/2013 07h	amplified drought	S4	0.00308703	20.6101	293.76	0.000699766
19/10/2013 08h	amplified drought	S4	2.41506	20.5499	293.7	0.000812021
19/10/2013 09h	amplified drought	S4	104.498	21.6687	294.819	0.00168179
19/10/2013 10h	amplified drought	S4	340.855	22.6199	295.77	0.0043131
19/10/2013 11h	amplified drought	S4	599.247	23.1652	296.315	0.0100721
19/10/2013 12h	amplified drought	S4	579.066	23.4654	296.615	0.0241553
19/10/2013 13h	amplified drought	S4	382.807	24.0182	297.168	0.0303119
19/10/2013 14h	amplified drought	S4	613.01	24.4633	297.613	0.0265075
19/10/2013 15h	amplified drought	S4	761.928	25.7938	298.944	0.0423752
19/10/2013 16h	amplified drought	S4	396.896	25.9984	299.148	0.0525611
19/10/2013 17h	amplified drought	S4	423.103	24.7127	297.863	0.024952
19/10/2013 18h	amplified drought	S4	95.2377	23.5533	296.703	0.0110483
19/10/2013 19h	amplified drought	S4	12.6899	22.1904	295.34	0.002998
19/10/2013 20h	amplified drought	S4	0.00649623	21.3164	294.466	0.00116405
26/10/2013 20h	amplified drought	S5	0.0116298	21.8309	294.981	0.00161405
26/10/2013 21h	amplified drought	S5	0.0118287	21.4378	294.588	0.00197826
26/10/2013 22h	amplified drought	S5	0.00508113	21.2509	294.401	0.00139444
26/10/2013 23h	amplified drought	S5	0.00313209	21.2157	294.366	0.00472669
27/10/2013 00h	amplified drought	S5	0.00939107	21.1226	294.273	0.00110323
27/10/2013 01h	amplified drought	S5	0.00299051	20.9596	294.11	0.00122083
27/10/2013 02h	amplified drought	S5	0.0088475	20.8188	293.969	0.00187984
27/10/2013 03h	amplified drought	S5	0.00977434	20.8136	293.964	0.000765728
27/10/2013 04h	amplified drought	S5	0.00639835	20.9138	294.064	0.000743427
27/10/2013 05h	amplified drought	S5	0.018596	21.0196	294.17	0.00130258
27/10/2013 06h	amplified drought	S5	0.0178523	21.3033	294.453	0.000750599
27/10/2013 07h	amplified drought	S5	0.00594966	21.0735	294.224	0.000457914
27/10/2013 08h	amplified drought	S5	0.0463342	21.081	294.231	0.00110296
27/10/2013 09h	amplified drought	S5	44.9171	21.0317	294.182	0.00130283
27/10/2013 10h	amplified drought	S5	172.43	21.7337	294.884	0.00252836
27/10/2013 11h	amplified drought	S5	409.488	22.4131	295.563	0.0045301
27/10/2013 12h	amplified drought	S5	567.575	24.1693	297.319	0.0211392
27/10/2013 13h	amplified drought	S5	453.326	24.6696	297.82	0.0404254
27/10/2013 14h	amplified drought	S5	564.466	24.6175	297.767	0.0350075
27/10/2013 15h	amplified drought	S5	880.155	26.8859	300.036	0.108817
27/10/2013 16h	amplified drought	S5	538.829	26.6376	299.788	0.100623
27/10/2013 17h	amplified drought	S5	182.531	24.9431	298.093	0.0395515
27/10/2013 18h	amplified drought	S5	111.512	24.2343	297.384	0.0352385
27/10/2013 19h	amplified drought	S5	3.20673	22.365	295.515	0.00256178
23/10/2013 20h	amplified drought	S6	0.00607828	21.9299	295.08	0.00340806
23/10/2013 21h	amplified drought	S6	0.00207041	21.5763	294.726	0.00189244
23/10/2013 22h	amplified drought	S6	0.00479831	21.6403	294.79	0.00183751
23/10/2013 23h	amplified drought	S6	0.00950348	21.5529	294.703	0.0045349
24/10/2013 00h	amplified drought	S6	0.00228666	21.4343	294.584	0.00257902
24/10/2013 01h	amplified drought	S6	0.00367061	21.4337	294.584	0.0020829
24/10/2013 02h	amplified drought	S6	0.0115782	21.3783	294.528	0.00158528
24/10/2013 03h	amplified drought	S6	0.00724714	21.3808	294.531	0.0012374
24/10/2013 04h	amplified drought	S6	0.00957811	21.403	294.553	0.00173249
24/10/2013 05h	amplified drought	S6	0.00589888	21.5995	294.749	0.00190769
24/10/2013 06h	amplified drought	S6	0.00684384	21.703	294.853	0.00186046
24/10/2013 07h	amplified drought	S6	0.00761248	21.5351	294.685	0.00142047
24/10/2013 08h	amplified drought	S6	10.9306	20.9702	294.12	0.00102006
24/10/2013 09h	amplified drought	S6	128.582	21.7017	294.852	0.0192349
24/10/2013 10h	amplified drought	S6	175.332	22.2175	295.367	0.0103959
24/10/2013 11h	amplified drought	S6	188.113	22.6036	295.754	0.0184623
24/10/2013 12h	amplified drought	S6	348.376	23.39	296.54	0.033648
24/10/2013 13h	amplified drought	S6	369.783	24.1279	297.278	0.0558201
24/10/2013 14h	amplified drought	S6	247.301	24.5032	297.653	0.0510869
24/10/2013 15h	amplified drought	S6	210.451	24.4331	297.583	0.0677012
24/10/2013 16h	amplified drought	S6	169.074	24.8597	298.01	0.0723232
24/10/2013 17h	amplified drought	S6	114.388	24.0299	297.18	0.0113634
24/10/2013 18h	amplified drought	S6	61.5407	23.7295	296.879	0.00727953
24/10/2013 19h	amplified drought	S6	2.09856	23.2309	296.381	0.00240571

## Sheet: Formaldehyde spring
date	treatment	trees code	PAR	TEMP (°C)	TEMP (K)	Emissions Rate Formaldehyde (µgC.g(MS)-1.h-1)
12/05/2014 20h	natural drought	C2	72.8861	22.0939	295.244	0.0285037
12/05/2014 21h	natural drought	C2	10.7855	21.2159	294.366	0.0165599
12/05/2014 22h	natural drought	C2	0.00285425	20.6017	293.752	0.0113178
12/05/2014 23h	natural drought	C2	0.00137445	20.4121	293.562	0.00878338
13/05/2014 00h	natural drought	C2	0.00165702	19.7439	292.894	0.0120634
13/05/2014 01h	natural drought	C2	0.00201519	19.1374	292.287	0.0101801
13/05/2014 02h	natural drought	C2	0.00104849	18.991	292.141	0.0120167
13/05/2014 03h	natural drought	C2	0.00130132	18.5595	291.71	0.00831681
13/05/2014 04h	natural drought	C2	0.000975496	18.286	291.436	0.0123565
13/05/2014 05h	natural drought	C2	0.00275369	18.1874	291.337	0.00794192
13/05/2014 06h	natural drought	C2	0.15613	18.1829	291.333	0.00654702
13/05/2014 07h	natural drought	C2	47.1451	18.4127	291.563	0.0106286
13/05/2014 08h	natural drought	C2	111.549	19.6496	292.8	0.0330494
13/05/2014 09h	natural drought	C2	146.192	20.8553	294.005	0.0470557
13/05/2014 10h	natural drought	C2	233.505	22.0209	295.171	0.0739773
13/05/2014 11h	natural drought	C2	661.713	24.0583	297.208	0.0662191
13/05/2014 12h	natural drought	C2	1086.46	26.1197	299.27	0.10137
13/05/2014 13h	natural drought	C2	1193.67	26.1605	299.311	0.164651
13/05/2014 14h	natural drought	C2	1659.61	24.8671	298.017	0.152693
13/05/2014 15h	natural drought	C2	1913.93	24.7149	297.865	0.184721
13/05/2014 16h	natural drought	C2	2003.56	25.7397	298.89	0.144039
13/05/2014 17h	natural drought	C2	1951.54	24.2279	297.378	0.120706
13/05/2014 18h	natural drought	C2	286.744	23.5522	296.702	0.114496
11/05/2014 17h	natural drought	C3	367.993	25.6111	298.761	0.109323
11/05/2014 18h	natural drought	C3	212.502	25.5295	298.679	0.106029
11/05/2014 19h	natural drought	C3	154.645	24.8677	298.018	0.0818447
11/05/2014 20h	natural drought	C3	39.939	23.7669	296.917	0.0360371
11/05/2014 21h	natural drought	C3	0.138401	22.803	295.953	0.026438
11/05/2014 22h	natural drought	C3	0.00124183	22.4022	295.552	0.0196672
11/05/2014 23h	natural drought	C3	0.00120093	21.959	295.109	0.026522
12/05/2014 00h	natural drought	C3	0.000506895	21.5081	294.658	0.0217319
12/05/2014 01h	natural drought	C3	0.000576298	21.2261	294.376	0.0342814
12/05/2014 02h	natural drought	C3	0.000581256	21.1539	294.304	0.0245202
12/05/2014 03h	natural drought	C3	0.0005354	20.995	294.145	0.036829
12/05/2014 04h	natural drought	C3	0.000546553	20.8498	294	0.0302526
12/05/2014 05h	natural drought	C3	0.00107451	20.8068	293.957	0.03677
12/05/2014 06h	natural drought	C3	6.05503	20.495	293.645	0.0295297
12/05/2014 07h	natural drought	C3	83.0046	20.6259	293.776	0.0664418
12/05/2014 08h	natural drought	C3	540.153	24.6913	297.841	0.193336
12/05/2014 09h	natural drought	C3	1066.53	27.1683	300.318	0.265069
12/05/2014 10h	natural drought	C3	623.052	26.0099	299.16	0.228164
12/05/2014 11h	natural drought	C3	1039.4	25.8337	298.984	0.199258
12/05/2014 12h	natural drought	C3	1271.92	26.7602	299.91	0.20698
12/05/2014 13h	natural drought	C3	1528.05	27.2701	300.42	0.239215
12/05/2014 14h	natural drought	C3	1296.55	27.6894	300.839	0.178746
12/05/2014 15h	natural drought	C3	1197.77	26.6286	299.779	0.14962
12/05/2014 16h	natural drought	C3	719.045	24.9384	298.088	0.095514
13/05/2014 21h	natural drought	C4	0.146195	19.0509	292.201	0.0201182
13/05/2014 22h	natural drought	C4	0.00124679	18.8006	291.951	0.0247879
13/05/2014 23h	natural drought	C4	0.00261875	18.6969	291.847	0.0184299
14/05/2014 00h	natural drought	C4	0.00247994	18.3504	291.5	0.020722
14/05/2014 01h	natural drought	C4	0.00171154	17.8185	290.969	0.00979285
14/05/2014 02h	natural drought	C4	0.00200156	18.1334	291.283	0.0189406
14/05/2014 03h	natural drought	C4	0.00161983	18.0721	291.222	0.0189406
14/05/2014 04h	natural drought	C4	0.0015839	18.1438	291.294	0.0146729
14/05/2014 05h	natural drought	C4	0.00767281	17.7725	290.922	0.0185525
14/05/2014 06h	natural drought	C4	25.0549	18.4876	291.638	0.0251587
14/05/2014 07h	natural drought	C4	415.187	20.3607	293.511	0.0656896
14/05/2014 08h	natural drought	C4	837.637	22.4225	295.573	0.150749
14/05/2014 09h	natural drought	C4	819.089	23.8532	297.003	0.2441
14/05/2014 10h	natural drought	C4	1520.56	24.4471	297.597	0.198115
14/05/2014 11h	natural drought	C4	1741.6	25.2146	298.365	0.345418
14/05/2014 12h	natural drought	C4	1864.46	26.1035	299.253	0.375204
14/05/2014 13h	natural drought	C4	1887.5	25.6408	298.791	0.396892
14/05/2014 14h	natural drought	C4	1814.39	25.9459	299.096	0.367609
14/05/2014 15h	natural drought	C4	1647.61	26.058	299.208	0.354491
14/05/2014 16h	natural drought	C4	1386.24	26.4832	299.633	0.31139
14/05/2014 17h	natural drought	C4	145.96	25.0099	298.16	0.185293
14/05/2014 18h	natural drought	C4	695.787	24.9911	298.141	0.166373
15/05/2014 21h	natural drought	C5	0.293926	20.0924	293.242	0.0143674
15/05/2014 22h	natural drought	C5	0.00320373	19.4445	292.594	0.0106169
15/05/2014 23h	natural drought	C5	0.00252469	19.0412	292.191	0.00993468
16/05/2014 00h	natural drought	C5	0.00212736	18.9035	292.054	0.0097685
16/05/2014 01h	natural drought	C5	0.0031777	18.5835	291.734	0.00885474
16/05/2014 02h	natural drought	C5	0.00287157	18.3404	291.49	0.00739193
16/05/2014 03h	natural drought	C5	0.00267205	18.189	291.339	0.007864
16/05/2014 04h	natural drought	C5	0.00170411	17.9337	291.084	0.00659943
16/05/2014 05h	natural drought	C5	0.00515819	17.8614	291.011	0.00929593
16/05/2014 06h	natural drought	C5	17.5472	17.6235	290.773	0.00992743
16/05/2014 07h	natural drought	C5	163.628	18.3512	291.501	0.0250584
16/05/2014 08h	natural drought	C5	735.62	21.0637	294.214	0.076573
16/05/2014 09h	natural drought	C5	1153.72	22.9052	296.055	0.0912249
16/05/2014 10h	natural drought	C5	1531.35	23.8077	296.958	0.116806
16/05/2014 11h	natural drought	C5	1790.47	24.5369	297.687	0.153508
16/05/2014 12h	natural drought	C5	1950.85	25.2351	298.385	0.18418
16/05/2014 13h	natural drought	C5	2031.28	26.755	299.905	0.211452
16/05/2014 14h	natural drought	C5	1249.23	26.0836	299.234	0.138794
16/05/2014 15h	natural drought	C5	1822.53	26.6421	299.792	0.155704
16/05/2014 16h	natural drought	C5	600.377	24.8551	298.005	0.12637
16/05/2014 17h	natural drought	C5	334.3	23.5133	296.663	0.0550117
16/05/2014 18h	natural drought	C5	198.047	22.8557	296.006	0.015459
16/05/2014 19h	natural drought	C5	186.545	21.696	294.846	0.0282193
16/05/2014 20h	natural drought	C5	54.294	20.903	294.053	0.0170102
13/05/2014 21h	amplified drought	S1	18.1734	19.6037	292.754	0.0204755
13/05/2014 22h	amplified drought	S1	0.00597783	18.7341	291.884	0.011669
13/05/2014 23h	amplified drought	S1	0.00612478	18.7199	291.87	0.00909181
14/05/2014 00h	amplified drought	S1	0.00533129	18.338	291.488	0.00698594
14/05/2014 01h	amplified drought	S1	0.00382083	18.1348	291.285	0.00500459
14/05/2014 02h	amplified drought	S1	0.00484689	18.0769	291.227	0.00707941
14/05/2014 03h	amplified drought	S1	0.00629457	18.0828	291.233	0.00565244
14/05/2014 04h	amplified drought	S1	0.00481663	18.4043	291.554	0.0104394
14/05/2014 05h	amplified drought	S1	0.00260997	17.9523	291.102	0.00803625
14/05/2014 06h	amplified drought	S1	0.782193	18.0018	291.152	0.0061371
14/05/2014 07h	amplified drought	S1	61.8257	19.2968	292.447	0.0106486
14/05/2014 08h	amplified drought	S1	126.839	20.7329	293.883	0.0342253
14/05/2014 09h	amplified drought	S1	126.451	22.2416	295.392	0.0688971
14/05/2014 10h	amplified drought	S1	140.886	23.049	296.199	0.091332
14/05/2014 11h	amplified drought	S1	1504.18	23.553	296.703	0.0929841
14/05/2014 12h	amplified drought	S1	761.491	22.7978	295.948	0.0711692
14/05/2014 13h	amplified drought	S1	608.01	24.3081	297.458	0.11143
14/05/2014 14h	amplified drought	S1	1797.09	23.7574	296.907	0.0881097
14/05/2014 15h	amplified drought	S1	1722.97	24.7065	297.857	0.109172
14/05/2014 16h	amplified drought	S1	1548.15	24.8995	298.05	0.127207
14/05/2014 17h	amplified drought	S1	1284.7	24.0153	297.165	0.148549
14/05/2014 18h	amplified drought	S1	510.905	24.6209	297.771	0.122596
11/05/2014 17h	amplified drought	S3	124.95	26.5358	299.686	0.173759
11/05/2014 18h	amplified drought	S3	101.984	26.473	299.623	0.178065
11/05/2014 19h	amplified drought	S3	88.2173	26.1391	299.289	0.131062
11/05/2014 20h	amplified drought	S3	55.6785	25.6542	298.804	0.104292
11/05/2014 21h	amplified drought	S3	3.10915	23.4911	296.641	0.0257682
11/05/2014 22h	amplified drought	S3	0.00161957	22.6847	295.835	0.00362461
11/05/2014 23h	amplified drought	S3	0.00207152	22.1328	295.283	0.012964
12/05/2014 00h	amplified drought	S3	0.000551394	21.8081	294.958	0.00729789
12/05/2014 01h	amplified drought	S3	0.000930884	21.2631	294.413	0.0123559
12/05/2014 02h	amplified drought	S3	0.00110387	21.2249	294.375	0.0136879
12/05/2014 03h	amplified drought	S3	0.00103576	21.078	294.228	0.0218941
12/05/2014 04h	amplified drought	S3	0.00150283	20.8415	293.992	0.0122171
12/05/2014 05h	amplified drought	S3	0.00280133	20.8328	293.983	0.0193921
12/05/2014 06h	amplified drought	S3	0.0632907	20.6879	293.838	0.015275
12/05/2014 07h	amplified drought	S3	26.991	20.3964	293.546	0.0166838
12/05/2014 08h	amplified drought	S3	460.247	22.2979	295.448	0.079249
12/05/2014 09h	amplified drought	S3	472.853	23.4673	296.617	0.108186
12/05/2014 10h	amplified drought	S3	545.86	24.767	297.917	0.18666
12/05/2014 11h	amplified drought	S3	692.863	23.7073	296.857	0.131974
12/05/2014 12h	amplified drought	S3	652.154	24.3942	297.544	0.137201
12/05/2014 13h	amplified drought	S3	615.436	25.305	298.455	0.159382
12/05/2014 14h	amplified drought	S3	427.454	25.2411	298.391	0.134336
12/05/2014 15h	amplified drought	S3	244.06	25.1271	298.277	0.138194
12/05/2014 16h	amplified drought	S3	170.881	25.4654	298.615	0.138382
12/05/2014 19h	amplified drought	S4	152.85	22.7832	295.933	0.0317141
12/05/2014 20h	amplified drought	S4	40.9111	21.4062	294.556	0.0136847
12/05/2014 21h	amplified drought	S4	0.25507	20.7736	293.924	0.00594611
12/05/2014 22h	amplified drought	S4	0.00398301	20.432	293.582	0.00336877
12/05/2014 23h	amplified drought	S4	0.0055345	20.0109	293.161	-0.0117642
13/05/2014 00h	amplified drought	S4	0.00439394	19.4626	292.613	-0.0133071
13/05/2014 01h	amplified drought	S4	0.00360568	19.0605	292.211	0.00251455
13/05/2014 02h	amplified drought	S4	0.00510304	18.837	291.987	0.0218941
13/05/2014 03h	amplified drought	S4	0.00549773	18.4489	291.599	0.00251146
13/05/2014 04h	amplified drought	S4	0.00472477	18.2017	291.352	0.00142831
13/05/2014 05h	amplified drought	S4	0.00415921	18.1889	291.339	-0.000840402
13/05/2014 06h	amplified drought	S4	9.81637	18.1669	291.317	0.00130085
13/05/2014 07h	amplified drought	S4	108.032	19.4352	292.585	0.0177271
13/05/2014 08h	amplified drought	S4	423.736	20.5493	293.699	0.0381197
13/05/2014 09h	amplified drought	S4	159.735	21.2283	294.378	0.0404138
13/05/2014 10h	amplified drought	S4	1146.08	23.6127	296.763	0.11173
13/05/2014 11h	amplified drought	S4	1446.25	24.7065	297.857	0.123625
13/05/2014 12h	amplified drought	S4	1669.47	24.3297	297.48	0.137326
13/05/2014 13h	amplified drought	S4	1671.75	25.0129	298.163	0.121251
13/05/2014 14h	amplified drought	S4	1697.52	24.4363	297.586	0.105653
13/05/2014 15h	amplified drought	S4	1914.67	25.2437	298.394	0.120717
13/05/2014 16h	amplified drought	S4	1793.33	25.1401	298.29	0.111486
13/05/2014 17h	amplified drought	S4	800.739	22.5477	295.698	0.0456571
18/05/2014 20h	amplified drought	S5	70.3115	22.3515	295.501	0.00935889
18/05/2014 21h	amplified drought	S5	7.09532	21.5733	294.723	0.00317685
18/05/2014 22h	amplified drought	S5	0.00377574	20.5392	293.689	0.000399332
18/05/2014 23h	amplified drought	S5	0.00259264	19.8281	292.978	0.00296374
19/05/2014 00h	amplified drought	S5	0.00145015	19.585	292.735	0.00319061
19/05/2014 01h	amplified drought	S5	0.00291052	19.506	292.656	0.00113806
19/05/2014 02h	amplified drought	S5	0.00298535	19.6059	292.756	0.0031266
19/05/2014 03h	amplified drought	S5	0.00357931	19.45	292.6	0.00276439
19/05/2014 04h	amplified drought	S5	0.00480833	19.357	292.507	0.00318022
19/05/2014 05h	amplified drought	S5	0.00359662	19.1309	292.281	0.00211467
19/05/2014 06h	amplified drought	S5	1.6014	18.9743	292.124	0.00454334
19/05/2014 07h	amplified drought	S5	65.9189	19.3562	292.506	0.00650487
19/05/2014 08h	amplified drought	S5	301.48	20.8394	293.989	0.0333967
19/05/2014 09h	amplified drought	S5	531.383	22.322	295.472	0.0969283
19/05/2014 10h	amplified drought	S5	690.282	23.2402	296.39	0.115345
19/05/2014 11h	amplified drought	S5	1365.07	24.7016	297.852	0.168131
19/05/2014 12h	amplified drought	S5	1587.99	25.1126	298.263	0.181446
19/05/2014 13h	amplified drought	S5	1724.13	26.0299	299.18	0.109395
19/05/2014 14h	amplified drought	S5	1769.37	26.8106	299.961	0.148121
19/05/2014 15h	amplified drought	S5	1289.7	26.0123	299.162	0.0971791
19/05/2014 16h	amplified drought	S5	609.884	25.0377	298.188	0.0652941
19/05/2014 17h	amplified drought	S5	690.4	24.9172	298.067	0.0226814
19/05/2014 18h	amplified drought	S5	506.313	23.9888	297.139	0.00990688
19/05/2014 19h	amplified drought	S5	87.3436	22.883	296.033	0.0242645
15/05/2014 21h	amplified drought	S6	6.6394	20.4114	293.561	0.0169368
15/05/2014 22h	amplified drought	S6	0.0134141	19.6535	292.803	0.00863009
15/05/2014 23h	amplified drought	S6	0.00739899	19.3196	292.47	0.0074197
16/05/2014 00h	amplified drought	S6	0.00436252	19.1599	292.31	0.00604382
16/05/2014 01h	amplified drought	S6	0.004549	18.7845	291.934	0.00471323
16/05/2014 02h	amplified drought	S6	0.00595505	18.5441	291.694	0.00366556
16/05/2014 03h	amplified drought	S6	0.0075882	18.3295	291.479	0.00372757
16/05/2014 04h	amplified drought	S6	0.00764175	18.1799	291.33	0.00348145
16/05/2014 05h	amplified drought	S6	0.00661244	17.9877	291.138	0.00500437
16/05/2014 06h	amplified drought	S6	1.00029	17.8937	291.044	0.00400539
16/05/2014 07h	amplified drought	S6	82.9825	18.5675	291.717	0.0114105
16/05/2014 08h	amplified drought	S6	89.7516	19.8807	293.031	0.0216945
16/05/2014 09h	amplified drought	S6	213.843	21.656	294.806	0.0583369
16/05/2014 10h	amplified drought	S6	171.394	22.941	296.091	0.075428
16/05/2014 11h	amplified drought	S6	1761.76	24.2106	297.361	0.0819785
16/05/2014 12h	amplified drought	S6	1853.71	24.8318	297.982	0.106387
16/05/2014 14h	amplified drought	S6	1444.83	24.9565	298.107	0.0964051
16/05/2014 15h	amplified drought	S6	1141.95	24.5388	297.689	0.0776848
16/05/2014 16h	amplified drought	S6	659.31	24.2176	297.368	0.0712064
16/05/2014 17h	amplified drought	S6	319.925	23.7399	296.89	0.0486048
16/05/2014 18h	amplified drought	S6	112.302	22.9481	296.098	0.0476248
16/05/2014 19h	amplified drought	S6	121.505	21.9461	295.096	0.0221821
16/05/2014 20h	amplified drought	S6	116.751	21.2036	294.354	0.00787472

[truncated: 8 more sheets: formaldehyde summer, formaldehyde autumn, acetone spring, acetone summer, acetone autumn, acetaldehyde spring, acetaldehyde summer, acetaldehyde autumn]
