# Supplementary material for: Effect of mid-term drought on Quercus pubescens BVOCs' emission seasonality and their dependency on light and/or temperature
Source: Copernicus journal article supplement (doi:10.5194/acp-17-7555-2017), 2017-06-22
Supplement: Supplementary file 2 [file acp-17-7555-2017-supplement.zip › Supplement.pdf]

**Table S1:**  $R^2$  and  $P$ -value for correlations between measured emissions of isoprene and  $C_l^*C_t$  performed tree by tree according to the season and treatment, with ND = natural drought and AD = amplified drought and \*\*\* :  $P < 0.001$ . Data were obtained without forcing data to pass through the origin.

| Tree | Treatment | Spring |            | Summer |            | Autumn |            |
|------|-----------|--------|------------|--------|------------|--------|------------|
|      |           | $R^2$  | $P$ -value | $R^2$  | $P$ -value | $R^2$  | $P$ -value |
| 1    | ND        | /      | /          | 0.81   | ***        | 0.69   | ***        |
| 2    | ND        | 0.81   | ***        | 0.97   | ***        | 0.88   | ***        |
| 3    | ND        | 0.88   | ***        | 0.73   | ***        | 0.83   | ***        |
| 4    | ND        | 0.77   | ***        | 0.73   | ***        | 0.79   | ***        |
| 5    | ND        | 0.84   | ***        | 0.77   | ***        | 0.94   | ***        |
| 6    | AD        | 0.76   | ***        | 0.86   | ***        | 0.88   | ***        |
| 7    | AD        | 0.36   | ***        | 0.73   | ***        | 0.81   | ***        |
| 8    | AD        | 0.89   | ***        | 0.75   | ***        | 0.78   | ***        |
| 9    | AD        | 0.67   | ***        | 0.82   | ***        | 0.70   | ***        |
| 10   | AD        | 0.93   | ***        | 0.76   | ***        | 0.73   | ***        |

**Table S2:**  $R^2$  and  $P$ -value for correlations between measured emissions of MACR+MVK+ISOPOOH and  $C_t \cdot C_t$  or  $C_T$  performed tree by tree according to the season and treatment, with ND = natural drought and AD = amplified drought and \*\*\* :  $P < 0.001$ . Data were obtained without forcing data to pass through the origin.

|      |           | Spring |            |       |            | Summer |            |       |            | Autumn |            |       |            |
|------|-----------|--------|------------|-------|------------|--------|------------|-------|------------|--------|------------|-------|------------|
|      |           | L+T    |            | T     |            | L+T    |            | T     |            | L+T    |            | T     |            |
| Tree | Treatment | $R^2$  | $P$ -value | $R^2$ | $P$ -value | $R^2$  | $P$ -value | $R^2$ | $P$ -value | $R^2$  | $P$ -value | $R^2$ | $P$ -value |
| 1    | ND        | /      | /          | /     | /          | 0.70   | ***        | 0.89  | ***        | 0.78   | ***        | 0.52  | ***        |
| 2    | ND        | 0.88   | ***        | 0.72  | ***        | 0.80   | ***        | 0.69  | ***        | 0.91   | ***        | 0.81  | ***        |
| 3    | ND        | 0.87   | ***        | 0.84  | ***        | 0.70   | ***        | 0.48  | ***        | 0.85   | ***        | 0.77  | ***        |
| 4    | ND        | 0.88   | ***        | 0.93  | ***        | 0.64   | ***        | 0.73  | ***        | 0.83   | ***        | 0.79  | ***        |
| 5    | ND        | 0.89   | ***        | 0.84  | ***        | 0.78   | ***        | 0.61  | ***        | 0.88   | ***        | 0.67  | ***        |
| 6    | AD        | 0.89   | ***        | 0.91  | ***        | 0.82   | ***        | 0.87  | ***        | 0.89   | ***        | 0.86  | ***        |
| 7    | AD        | 0.42   | ***        | 0.89  | ***        | 0.60   | ***        | 0.69  | ***        | 0.88   | ***        | 0.37  | ***        |
| 8    | AD        | 0.92   | ***        | 0.87  | ***        | 0.76   | ***        | 0.57  | ***        | 0.80   | ***        | 0.84  | ***        |
| 9    | AD        | 0.76   | ***        | 0.67  | ***        | 0.59   | ***        | 0.71  | ***        | 0.76   | ***        | 0.93  | ***        |
| 10   | AD        | 0.93   | ***        | 0.94  | ***        | 0.82   | ***        | 0.82  | ***        | 0.76   | ***        | 0.83  | ***        |

**Table S3:**  $R^2$  and  $P$ -value for correlations between measured emissions of methanol and  $C_l \cdot C_l$  or  $C_T$  performed tree by tree according to the season and treatment, with ND = natural drought and AD = amplified drought and \* :  $P < 0.05$ ; \*\* :  $P < 0.01$ ; \*\*\* :  $P < 0.001$ . Data were obtained without forcing data to pass through the origin.

|      |           | Spring |            |       |            | Summer |            |       |            | Autumn |            |       |            |
|------|-----------|--------|------------|-------|------------|--------|------------|-------|------------|--------|------------|-------|------------|
|      |           | L+T    |            | T     |            | L+T    |            | T     |            | L+T    |            | T     |            |
| Tree | Treatment | $R^2$  | $P$ -value | $R^2$ | $P$ -value | $R^2$  | $P$ -value | $R^2$ | $P$ -value | $R^2$  | $P$ -value | $R^2$ | $P$ -value |
| 1    | ND        | /      | /          | /     | /          | 0.91   | ***        | 0.77  | ***        | 0.67   | ***        | 0.57  | ***        |
| 2    | ND        | 0.66   | ***        | 0.52  | ***        | 0.50   | ***        | 0.42  | ***        | 0.76   | ***        | 0.72  | ***        |
| 3    | ND        | 0.40   | ***        | 0.29  | **         | 0.58   | ***        | 0.41  | ***        | /      | ns         | /     | ns         |
| 4    | ND        | 0.87   | ***        | 0.74  | ***        | 0.84   | ***        | 0.82  | ***        | 0.93   | ***        | 0.74  | ***        |
| 5    | ND        | 0.80   | ***        | 0.63  | ***        | 0.85   | ***        | 0.80  | ***        | /      | ns         | /     | ns         |
| 6    | AD        | 0.63   | ***        | 0.71  | ***        | 0.91   | ***        | 0.87  | ***        | 0.95   | ***        | 0.90  | ***        |
| 7    | AD        | 0.34   | **         | 0.52  | ***        | 0.34   | **         | 0.26  | *          | 0.86   | ***        | 0.57  | ***        |
| 8    | AD        | 0.66   | ***        | 0.53  | ***        | 0.87   | ***        | 0.96  | ***        | 0.85   | ***        | 0.74  | ***        |
| 9    | AD        | 0.82   | ***        | 0.65  | ***        | 0.83   | ***        | 0.71  | ***        | 0.81   | ***        | 0.91  | ***        |
| 10   | AD        | 0.83   | ***        | 0.83  | ***        | 0.78   | ***        | 0.79  | ***        | 0.55   | ***        | 0.35  | **         |

**Table S4:** R<sup>2</sup> and *P*-value for correlations between measured emissions of acetone and  $C_l \cdot C_t$  or  $C_T$  performed tree by tree according to the season and treatment, with ND = natural drought and AD = amplified drought and \*\* :  $P < 0.01$ ; \*\*\* :  $P < 0.001$ . Data were obtained without forcing data to pass through the origin.

|      |           | Spring         |                 |                |                 | Summer         |                 |                |                 | Autumn         |                 |                |                 |
|------|-----------|----------------|-----------------|----------------|-----------------|----------------|-----------------|----------------|-----------------|----------------|-----------------|----------------|-----------------|
|      |           | L+T            |                 | T              |                 | L+T            |                 | T              |                 | L+T            |                 | T              |                 |
| Tree | Treatment | R <sup>2</sup> | <i>P</i> -value |
| 1    | ND        | /              | /               | /              | /               | 0.85           | ***             | 0.70           | ***             | 0.73           | ***             | 0.61           | ***             |
| 2    | ND        | 0.94           | ***             | 0.82           | ***             | 0.66           | ***             | 0.57           | ***             | 0.89           | ***             | 0.83           | ***             |
| 3    | ND        | 0.91           | ***             | 0.81           | ***             | 0.75           | ***             | 0.55           | ***             | 0.75           | ***             | 0.67           | ***             |
| 4    | ND        | 0.92           | ***             | 0.90           | ***             | 0.84           | ***             | 0.84           | ***             | 0.61           | ***             | 0.51           | ***             |
| 5    | ND        | 0.92           | ***             | 0.84           | ***             | 0.91           | ***             | 0.77           | ***             | /              | ns              | /              | ns              |
| 6    | AD        | 0.90           | ***             | 0.91           | ***             | 0.75           | ***             | 0.73           | ***             | 0.97           | ***             | 0.88           | ***             |
| 7    | AD        | 0.62           | ***             | 0.68           | ***             | 0.48           | ***             | /              | ns              | 0.90           | ***             | 0.58           | ***             |
| 8    | AD        | 0.96           | ***             | 0.83           | ***             | 0.60           | **              | 0.72           | ***             | 0.86           | ***             | 0.89           | ***             |
| 9    | AD        | 0.89           | ***             | 0.83           | ***             | 0.40           | **              | 0.49           | ***             | 0.67           | ***             | 0.71           | ***             |
| 10   | AD        | 0.89           | ***             | 0.88           | ***             | 0.74           | ***             | 0.61           | ***             | 0.45           | ***             | 0.32           | **              |

**Table S5:**  $R^2$  and  $P$ -value for correlations between measured emissions of formaldehyde and  $C_l \cdot C_t$  or  $C_T$  performed tree by tree according to the season and treatment, with ND = natural drought and AD = amplified drought and \*\* :  $P < 0.01$ ; \*\*\* :  $P < 0.001$ . Data were obtained without forcing data to pass through the origin.

|      |           | Spring |            |       |            | Summer |            |       |            | Autumn |            |       |            |
|------|-----------|--------|------------|-------|------------|--------|------------|-------|------------|--------|------------|-------|------------|
|      |           | L+T    |            | T     |            | L+T    |            | T     |            | L+T    |            | T     |            |
| Tree | Treatment | $R^2$  | $P$ -value | $R^2$ | $P$ -value | $R^2$  | $P$ -value | $R^2$ | $P$ -value | $R^2$  | $P$ -value | $R^2$ | $P$ -value |
| 1    | ND        | /      | /          | /     | /          | 0.90   | ***        | 0.86  | ***        | 0.90   | ***        | 0.79  | ***        |
| 2    | ND        | 0.88   | ***        | 0.74  | ***        | 0.85   | ***        | 0.82  | ***        | 0.95   | ***        | 0.90  | ***        |
| 3    | ND        | 0.88   | ***        | 0.78  | ***        | 0.87   | ***        | 0.62  | ***        | 0.42   | ***        | 0.46  | ***        |
| 4    | ND        | 0.92   | ***        | 0.90  | ***        | 0.80   | ***        | 0.77  | ***        | 0.86   | ***        | 0.78  | ***        |
| 5    | ND        | 0.93   | ***        | 0.82  | ***        | 0.83   | ***        | 0.77  | ***        | 0.54   | ***        | 0.53  | ***        |
| 6    | AD        | 0.88   | ***        | 0.90  | ***        | 0.87   | ***        | 0.81  | ***        | 0.91   | ***        | 0.83  | ***        |
| 7    | AD        | 0.70   | ***        | 0.68  | ***        | 0.44   | ***        | 0.55  | ***        | 0.67   | ***        | 0.45  | ***        |
| 8    | AD        | 0.94   | ***        | 0.84  | ***        | 0.81   | ***        | 0.70  | **         | 0.86   | ***        | 0.82  | ***        |
| 9    | AD        | 0.71   | ***        | 0.50  | ***        | 0.73   | ***        | /     | ns         | 0.84   | ***        | 0.93  | ***        |
| 10   | AD        | 0.88   | ***        | 0.89  | ***        | 0.63   | ***        | /     | ns         | 0.72   | ***        | 0.74  | ***        |

**Table S6:** R<sup>2</sup> and *P*-value for correlations between measured emissions of acetaldehyde and  $C_l \cdot C_t$  or  $C_T$  performed tree by tree according to the season and treatment, with ND = natural drought and AD = amplified drought and \* :  $P < 0.05$ ; \*\* :  $P < 0.01$ ; \*\*\* :  $P < 0.001$ . Data were obtained without forcing data to pass through the origin.

|      |           | Spring         |                 |                |                 | Summer         |                 |                |                 | Autumn         |                 |                |                 |
|------|-----------|----------------|-----------------|----------------|-----------------|----------------|-----------------|----------------|-----------------|----------------|-----------------|----------------|-----------------|
|      |           | L+T            |                 | T              |                 | L+T            |                 | T              |                 | L+T            |                 | T              |                 |
| Tree | Treatment | R <sup>2</sup> | <i>P</i> -value |
| 1    | ND        | /              | /               | /              | /               | 0.90           | ***             | 0.69           | ***             | 0.72           | ***             | 0.42           | ***             |
| 2    | ND        | 0.92           | ***             | 0.77           | ***             | 0.34           | **              | /              | ns              | 0.89           | ***             | 0.65           | ***             |
| 3    | ND        | 0.67           | ***             | 0.50           | ***             | 0.66           | ***             | 0.37           | **              | 0.89           | ***             | 0.79           | ***             |
| 4    | ND        | 0.82           | ***             | 0.54           | ***             | 0.54           | ***             | 0.45           | ***             | 0.84           | ***             | 0.54           | ***             |
| 5    | ND        | 0.84           | ***             | 0.61           | ***             | 0.80           | ***             | 0.50           | ***             | 0.74           | ***             | 0.35           | **              |
| 6    | AD        | 0.82           | ***             | 0.77           | ***             | 0.70           | ***             | 0.37           | ***             | 0.99           | ***             | 0.68           | ***             |
| 7    | AD        | 0.76           | ***             | 0.16           | *               | 0.22           | *               | /              | ns              | 0.85           | ***             | 0.26           | *               |
| 8    | AD        | 0.73           | ***             | 0.45           | ***             | 0.37           | *               | /              | ns              | 0.97           | ***             | 0.60           | ***             |
| 9    | AD        | 0.84           | ***             | 0.75           | ***             | 0.81           | ***             | 0.52           | ***             | 0.93           | ***             | 0.73           | ***             |
| 10   | AD        | 0.82           | ***             | 0.79           | ***             | 0.83           | ***             | 0.60           | ***             | 0.88           | ***             | 0.46           | ***             |

**Table S7:** Values of paramaters used to calculate the modelled emissions with  $L+T$  algorithm including the emissions factors for  $L+T$  algorithm ( $EF_{L+T}$ ) which corresponds to the mean of slopes of correlations between  $ER$  (experimental emissions rates) and  $C_l^*C_l$  algorithm values and  $B$  which corresponds to the mean of intercepts of correlations between  $ER$  and  $C_l^*C_l$  algorithm values with ND = natural drought and AD = amplified drought. Asterisks represent if  $B$  is different from 0 ( $P < 0.05$ ). Values are mean  $\pm$  SE,  $n = 5$ .

| Compounds        | Treatment | Spring                |                    | Summer          |                    | Autumn         |                     |
|------------------|-----------|-----------------------|--------------------|-----------------|--------------------|----------------|---------------------|
|                  |           | $EF_{L+T}$<br>(slope) | $B$<br>(intercept) | $EF_{L+T}$      | $B$<br>(intercept) | $EF_{L+T}$     | $B$<br>(intercept)  |
| Isoprene         | ND        | $28.5 \pm 4.6$        | $-0.8 \pm 0.25^*$  | $118.0 \pm 8.4$ | $-2.5 \pm 1.5$     | $6.4 \pm 1.1$  | $-0.02 \pm 0.04$    |
|                  | AD        | $17.8 \pm 2.4$        | $0.1 \pm 0.40$     | $84.8 \pm 9.0$  | $-6.4 \pm 5.3$     | $12.0 \pm 2.8$ | $-0.12 \pm 0.03^*$  |
| MACR+MVK+ISOPOOH | ND        | $0.2 \pm 0.03$        | $0.001 \pm 0.002$  | $0.3 \pm 0.02$  | $0.01 \pm 0.01$    | $0.1 \pm 0.01$ | $0.002 \pm 0.001^*$ |
|                  | AD        | $0.1 \pm 0.01$        | $0.004 \pm 0.002$  | $0.2 \pm 0.03$  | $-0.02 \pm 0.03$   | $0.1 \pm 0.02$ | $-0.0 \pm 0.0$      |
| Methanol         | ND        | $1.0 \pm 0.2$         | $0.13 \pm 0.05^*$  | $0.7 \pm 0.04$  | $0.18 \pm 0.07$    | $0.3 \pm 0.1$  | $0.04 \pm 0.01$     |
|                  | AD        | $0.8 \pm 0.1$         | $0.12 \pm 0.05$    | $0.5 \pm 0.1$   | $0.1 \pm 0.05$     | $0.4 \pm 0.1$  | $0.05 \pm 0.01^*$   |
| Acetone          | ND        | $0.6 \pm 0.2$         | $0.14 \pm 0.11$    | $0.9 \pm 0.1$   | $0.1 \pm 0.1$      | $0.6 \pm 0.2$  | $0.15 \pm 0.04^*$   |
|                  | AD        | $0.5 \pm 0.1$         | $0.02 \pm 0.01^*$  | $0.4 \pm 0.03$  | $0.1 \pm 0.01^*$   | $0.8 \pm 0.3$  | $0.06 \pm 0.01^*$   |
| Formaldehyde     | ND        | $0.3 \pm 0.1$         | $0.01 \pm 0.01^*$  | $0.3 \pm 0.03$  | $0.03 \pm 0.01$    | $0.4 \pm 0.1$  | $0.05 \pm 0.01$     |
|                  | AD        | $0.2 \pm 0.02$        | $0.01 \pm 0.01$    | $0.2 \pm 0.03$  | $-0.1 \pm 0.01^*$  | $0.6 \pm 0.1$  | $0.02 \pm 0.03$     |
| Acetaldehyde     | ND        | $2.4 \pm 0.7$         | $0.06 \pm 0.02^*$  | $1.7 \pm 0.4$   | $0.32 \pm 0.19$    | $2.5 \pm 0.6$  | $0.1 \pm 0.02^*$    |
|                  | AD        | $2.1 \pm 0.9$         | $0.07 \pm 0.02^*$  | $0.9 \pm 0.1$   | $0.18 \pm 0.06^*$  | $2.5 \pm 0.7$  | $0.1 \pm 0.02^*$    |

**Table S8** : Values of paramaters used to calculate the modelled emissions with *T* algorithm including the experimental coefficient  $\beta$  which correspond to the mean of slopes of correlations between *lnER* and experimental temperatures, emissions factors for *T* algorithm ( $EF_T$ ) which corresponds to the mean of slopes of correlations between *ER* and  $C_T$  algorithm values and *B* which corresponds to the mean of intercepts of correlations between *ER* and  $C_T$  algorithm values with ND = natural drought and AD = amplified drought. Asterisks represent if *B* is different from 0 at  $P < 0.05$ . Values are mean  $\pm$  SE, n = 5.

| Compounds        | Treatment | $\beta$        | Spring            |                         | $\beta$        | Summer            |                         | $\beta$        | Autumn            |                         |
|------------------|-----------|----------------|-------------------|-------------------------|----------------|-------------------|-------------------------|----------------|-------------------|-------------------------|
|                  |           |                | $EF_T$<br>(slope) | <i>B</i><br>(intercept) |                | $EF_T$<br>(slope) | <i>B</i><br>(intercept) |                | $EF_T$<br>(slope) | <i>B</i><br>(intercept) |
| MACR+MVK+ISOPOOH | ND        | 0.5 $\pm$ 0.01 | 0.7 $\pm$ 0.15    | 0.01 $\pm$ 0.001*       | 0.5 $\pm$ 0.1  | 0.4 $\pm$ 0.1     | 0.04 $\pm$ 0.02         | 0.7 $\pm$ 0.1  | 1.6 $\pm$ 0.3     | 0.002 $\pm$ 0.001       |
|                  | AD        | 0.6 $\pm$ 0.04 | 0.9 $\pm$ 0.28    | 0.003 $\pm$ 0.001*      | 0.6 $\pm$ 0.1  | 0.2 $\pm$ 0.04    | 0.02 $\pm$ 0.01         | 0.9 $\pm$ 0.03 | 5.0 $\pm$ 1.6     | 0.01 $\pm$ 0.002*       |
| Methanol         | ND        | 0.3 $\pm$ 0.1  | 2.6 $\pm$ 0.8     | 0.1 $\pm$ 0.01*         | 0.3 $\pm$ 0.04 | 0.9 $\pm$ 0.04    | 0.1 $\pm$ 0.04          | 0.4 $\pm$ 0.1  | 1.1 $\pm$ 0.3     | 0.01 $\pm$ 0.001*       |
|                  | AD        | 0.3 $\pm$ 0.04 | 2.2 $\pm$ 0.2     | 0.03 $\pm$ 0.01*        | 0.3 $\pm$ 0.1  | 0.6 $\pm$ 0.04    | 0.03 $\pm$ 0.02         | 0.4 $\pm$ 0.04 | 1.4 $\pm$ 0.4     | 0.02 $\pm$ 0.01*        |
| Acetone          | ND        | 0.4 $\pm$ 0.01 | 1.8 $\pm$ 0.5     | 0.02 $\pm$ 0.01*        | 0.4 $\pm$ 0.1  | 1.1 $\pm$ 0.2     | 0.12 $\pm$ 0.04*        | 0.4 $\pm$ 0.03 | 2.4 $\pm$ 0.6     | 0.14 $\pm$ 0.01         |
|                  | AD        | 0.5 $\pm$ 0.02 | 2.1 $\pm$ 0.4     | 0.01 $\pm$ 0.002*       | 0.3 $\pm$ 0.1  | 0.5 $\pm$ 0.1     | 0.02 $\pm$ 0.02         | 0.5 $\pm$ 0.1  | 4.3 $\pm$ 1.8     | 0.03 $\pm$ 0.01         |
| Formaldehyde     | ND        | 0.4 $\pm$ 0.02 | 0.8 $\pm$ 0.2     | 0.01 $\pm$ 0.002*       | 0.4 $\pm$ 0.1  | 0.4 $\pm$ 0.1     | 0.03 $\pm$ 0.01*        | 0.4 $\pm$ 0.04 | 1.6 $\pm$ 0.4     | -0.02 $\pm$ 0.02        |
|                  | AD        | 0.5 $\pm$ 0.03 | 1.3 $\pm$ 0.2     | 0.01 $\pm$ 0.003*       | 0.4 $\pm$ 0.2  | 0.2 $\pm$ 0.1     | -0.04 $\pm$ 0.03        | 0.5 $\pm$ 0.02 | 2.7 $\pm$ 0.7     | -0.002 $\pm$ 0.03       |
| Acetaldehyde     | ND        | 0.5 $\pm$ 0.03 | 9.4 $\pm$ 2.7     | 0.21 $\pm$ 0.1*         | 0.4 $\pm$ 0.1  | 1.6 $\pm$ 0.3     | 0.26 $\pm$ 0.07*        | 0.7 $\pm$ 0.02 | 34.0 $\pm$ 3.1    | 0.1 $\pm$ 0.03*         |
|                  | AD        | 0.5 $\pm$ 0.1  | 7.9 $\pm$ 4.2     | 0.21 $\pm$ 0.13         | 0.5 $\pm$ 0.1  | 0.9 $\pm$ 0.1     | 0.23 $\pm$ 0.05*        | 0.7 $\pm$ 0.1  | 37.8 $\pm$ 4.3    | 0.18 $\pm$ 0.07         |

**Figure S1:** Diurnal pattern of photosynthetic active radiations (PAR) and temperatures in spring, summer and autumn. Values are mean  $\pm$  SE, n=5.

**Figure S2:** Diurnal pattern of MACR+MVK+ISOPOOH emissions rates, where points represent measured emissions, the yellow line corresponds to modelled emissions rates according to the  $L+T$  algorithm ( $ER_{L+T}$ ) and the dotted line corresponds to modelled emissions rates according to the  $T$  algorithm ( $ER_T$ ).  $R^2$  and slope (sl) of correlations between measured (x axis) and modelled emissions (y axis) are presented in the yellow frame for  $L+T$  and in the white frame for  $T$ . Correlations were obtained without forcing data to pass through the origin. Values are mean  $\pm$  SE, n=5.

**Figure S3:** Diurnal pattern of acetone emissions rates where points represent measured emissions, the yellow line corresponds to modelled emissions rates according to the  $L+T$  algorithm ( $ER_{L+T}$ ) and the dotted line corresponds to modelled emissions rates according to the  $T$  algorithm ( $ER_T$ ).  $R^2$  and slope (sl) of correlations between measured (x axis) and modelled (y axis) emissions are presented in the yellow frame for  $L+T$  and in the white frame for  $T$ . Correlations were obtained without forcing data to pass through the origin. Values are mean  $\pm$  SE, n=5.

**Figure S4:** Diurnal pattern of formaldehyde emissions rates where points represent measured emissions, the yellow line corresponds to modelled emissions rates according to the  $L+T$  algorithm ( $ER_{L+T}$ ) and the dotted line corresponds to modelled emissions rates according to the  $T$  algorithm ( $ER_T$ ).  $R^2$  and slope (sl) of correlations between measured (x axis) and modelled emissions (y axis) are presented in yellow frame for  $L+T$  and in white frame for  $T$ . Correlations were obtained without forcing data to pass through the origin. Values are mean  $\pm$  SE, n=5.

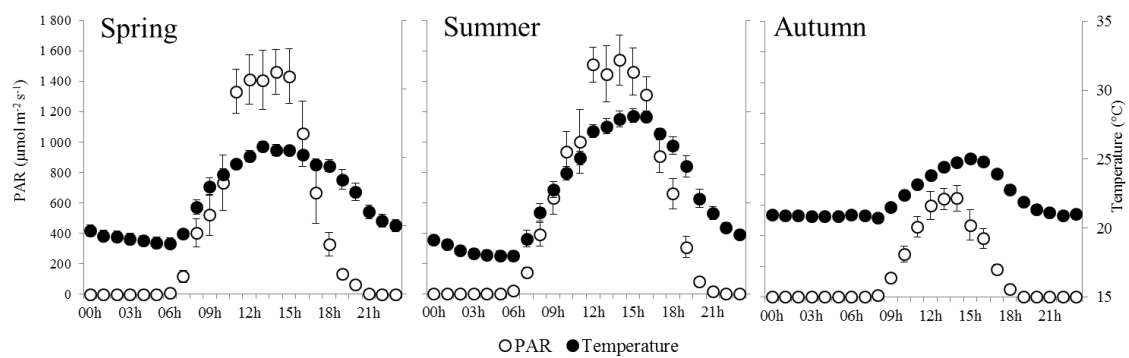

**Figure S1:**

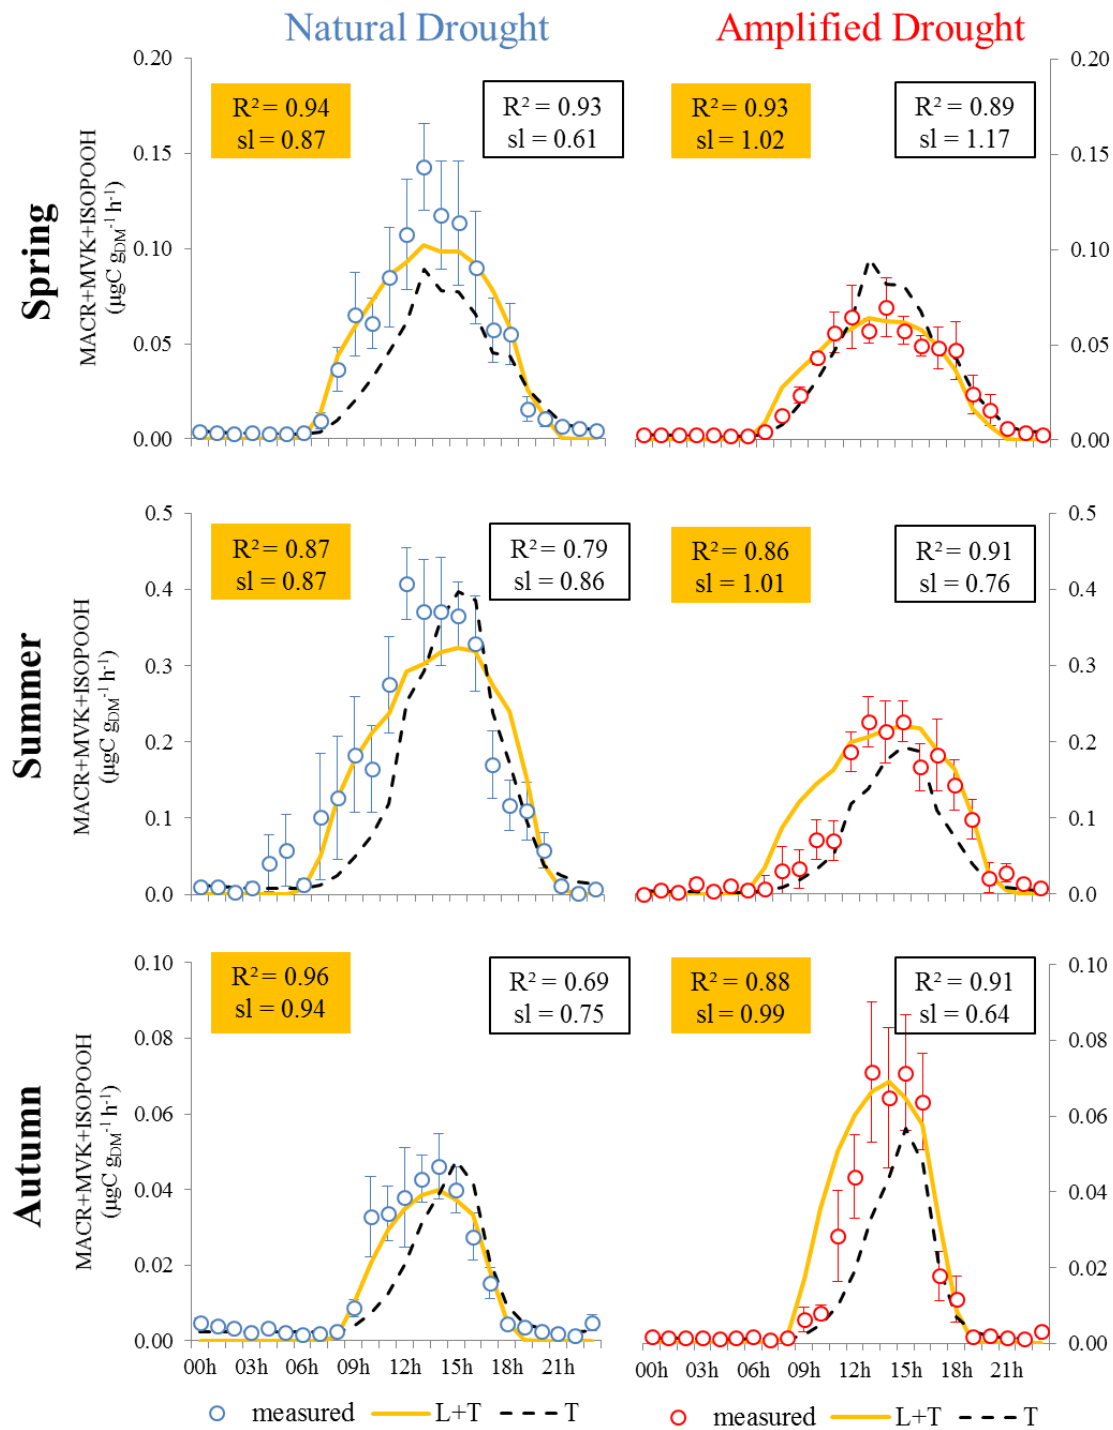

**Figure S2:**

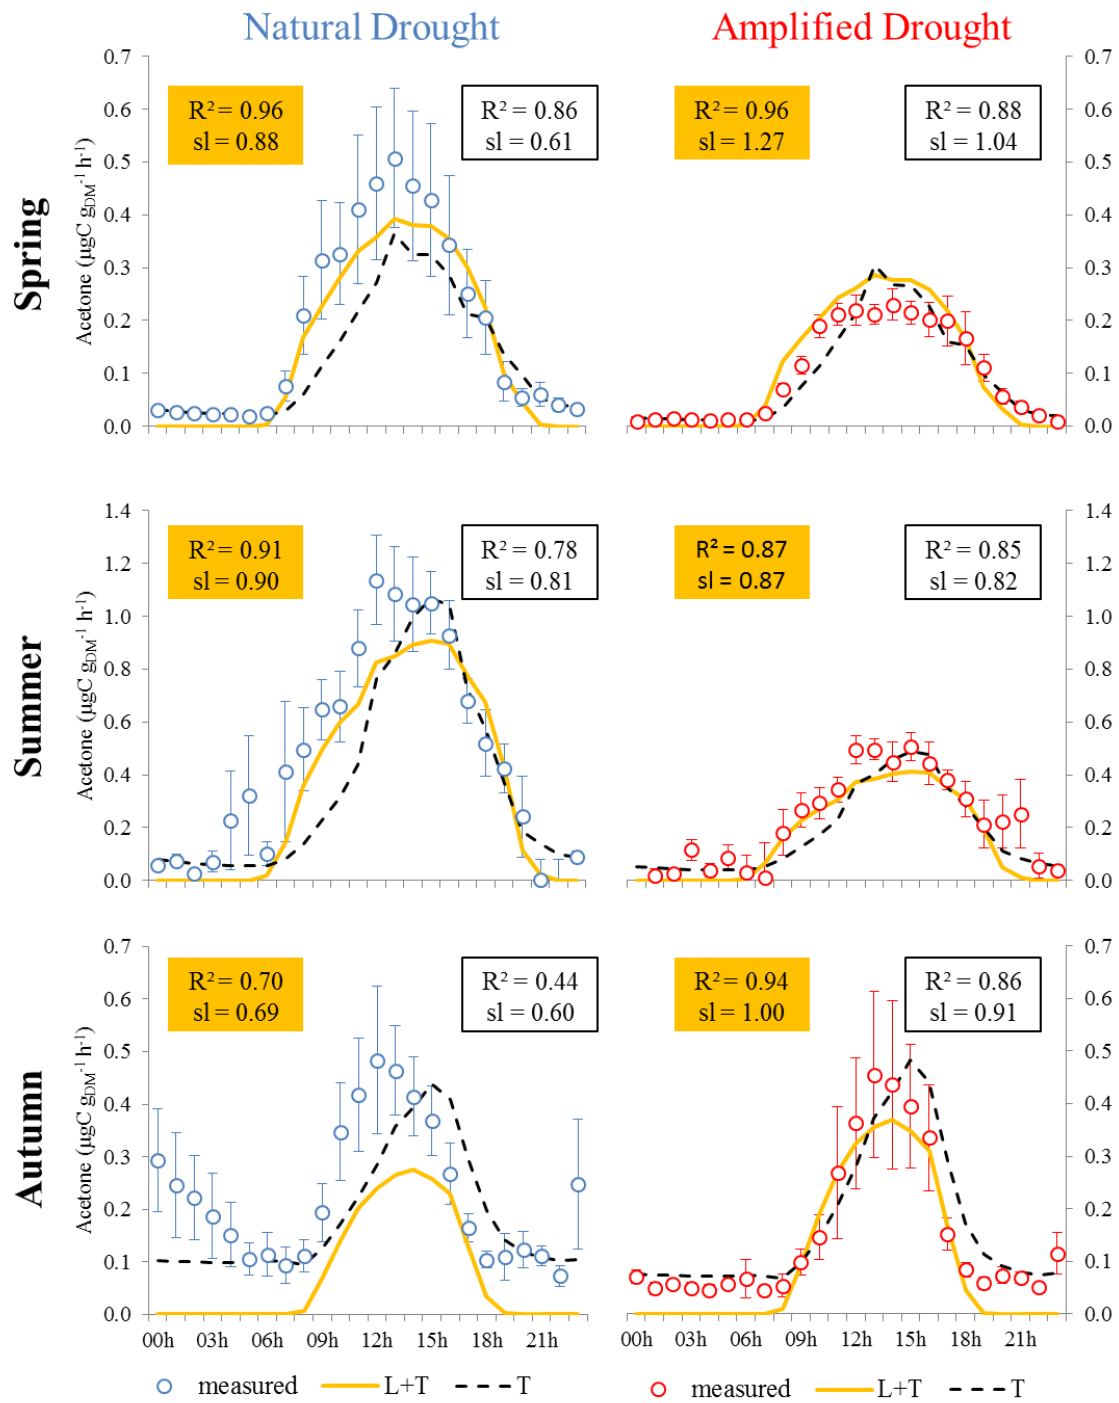

**Figure S3:**

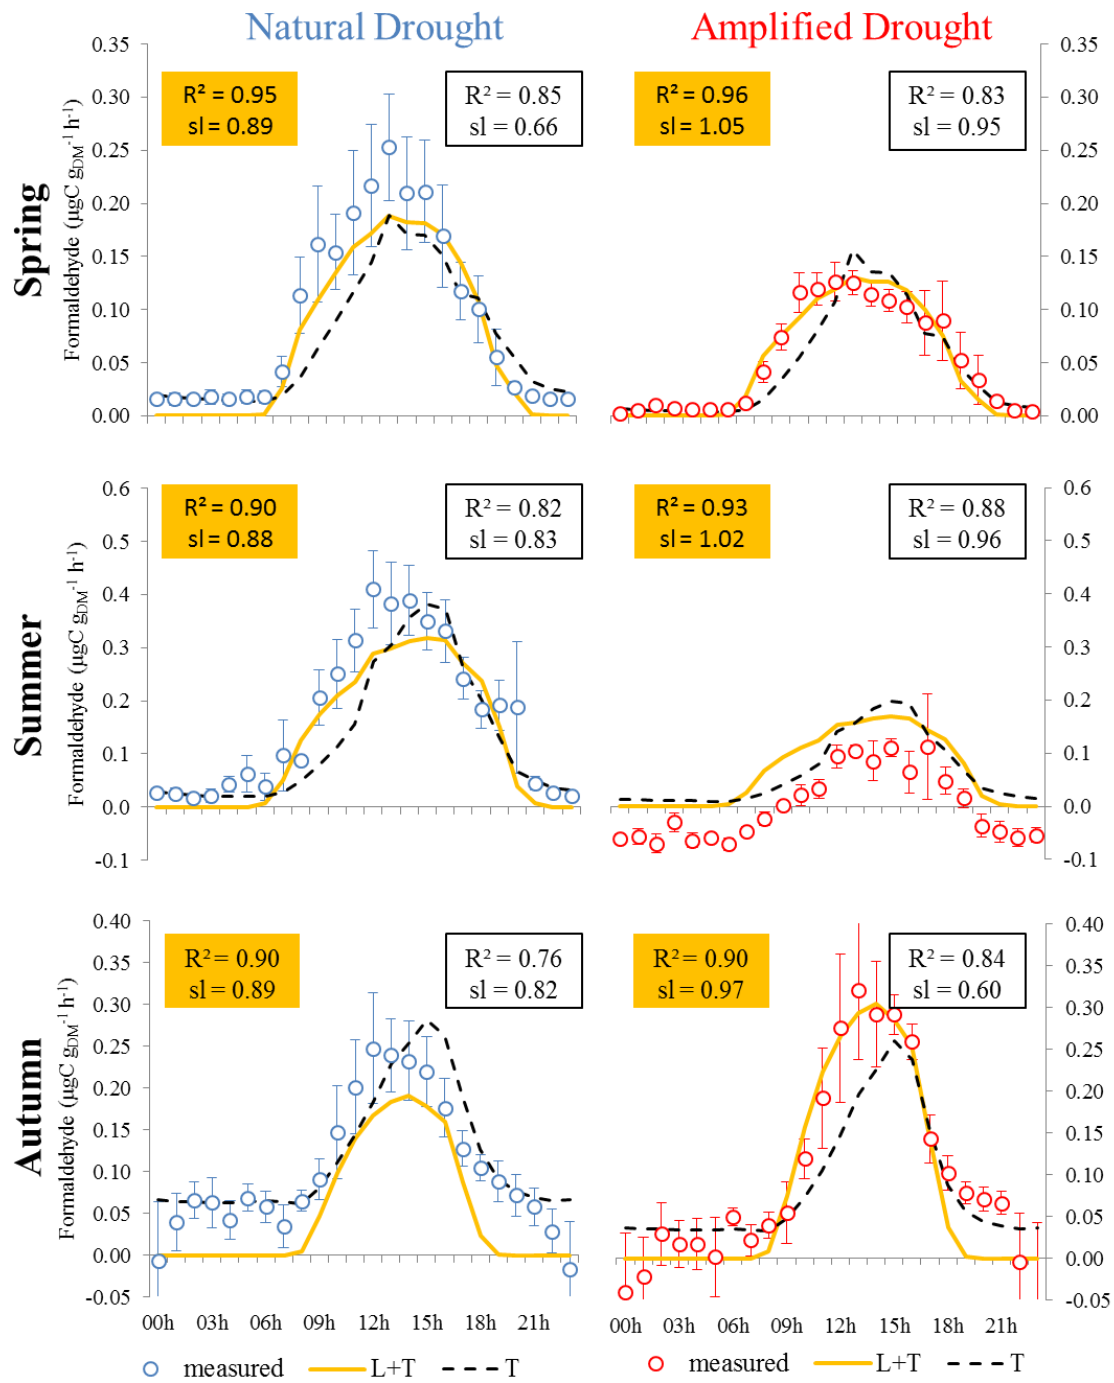

**Figure S4:**
